# Supplementary material for: A Longitudinal Approach to Biological Psychiatric Research: The PsyCourse Study
Source: Preprints.org preprint supplement (doi:10.20944/preprints201710.0169.v1), 2017-10-27
Supplement: Supplementary file 1 [file S3_R_Code_Ancestry_PCA_Plot.docx]

**#Set working directory**

setwd("~/")

**#Load libraries**

library("ggplot2", lib.loc="~/R/win-library/3.2")

**#Read in data**

PCA_data2 <- read.table("PCA_psycourse_1KG_v4.evec", quote="\"")

KG_psycourse_pops <- read.delim("KG_psycourse_pops.txt")

**#Merge PsyCourse and population data**

KG_psycourse_merged <- merge(KG_psycourse_pops, PCA_data2, by.x="sample", by.y="V1")

psycourses <- KG_psycourse_merged[KG_psycourse_merged$PsyCourse=="PsyCourse",c(1:7)]

**#Create plot**

ggplot(KG_psycourse_merged, aes(x=V2, y=V3)) + geom_point(data=(KG_psycourse_merged[KG_psycourse_merged$super_pop!="PsyCourse",]),pch=21, colour="Black", size=5,position = 'jitter',alpha=0.4, aes(fill=super_pop)) + scale_fill_discrete(name="1000 Genomes\nSuper Populations") + theme(legend.text = element_text(face = "bold")) + geom_point(data=psycourses, aes(x=V2, y=V3, color=psycourses$PsyCourse), pch=23, size=4, fill="orange",position = 'jitter', stroke=0.2) + scale_color_manual(values="black") + guides(color=guide_legend(title=NULL))+ theme_light() + xlab("First Principal Component") + ylab("Second Principal Component") + theme(axis.title.y = element_text(margin=margin(r = 20), size=15, face="bold")) + theme(axis.title.x = element_text(margin=margin(t = 20), size=16, face="bold"))

ggsave("PsyCourse_1KG.png", width=8, height=7)
