# Supplementary material for: A Longitudinal Approach to Biological Psychiatric Research: The PsyCourse Study
Source: Preprints.org preprint supplement (doi:10.20944/preprints201710.0169.v1), 2017-10-27
Supplement: Supplementary file 1 [file supplementary]

**Data Preparation and Analyses with SPSS Version 24 for the Manuscript**  
***“A Longitudinal Approach to Biological Psychiatric Research: The PsyCourse***  
***Study”***

*Monika Budde; October 2017*

|                                                     |    |
|-----------------------------------------------------|----|
| Preparation Phenotypic Data                         | 2  |
| Preparation Phenotypic Data SPSS                    | 3  |
| Preparation PRS and Ancestry Principal Components 1 | 5  |
| Standardization and Distribution PRS SPSS           | 6  |
| Logistic Regression PRS Diagnostic Group SPSS       | 11 |
| Preparation Phenotypic Data Follow_up               | 67 |
| Preparation Phenotypic Data Follow_up SPSS          | 68 |
| Logistic Regression Phenotypic Follow_up SPSS       | 70 |
| Preparation PRS and Ancestry Principal Components 2 | 79 |
| Logistic Regression PRS Follow_up SPSS              | 80 |

## **1. Polygenic risk score analyses of diagnostic group**

### **1.1 Preparation phenotype data**

- Load data from version v1.1.2 into SPSS and save datafile "phenodata\_v1.1.2\_raw.sav"
- Open "phenodata\_v1.1.2\_raw.sav" (N=891)
- Save as "phenodata\_v1.1.2\_prep.sav" (N=891)
- Recode diagnosis (*v1\_scid\_dsm\_dx\_cat*) into dichotomous variable *v1\_diagn\_group*  
[frequencies: N (AFF) = 367; N(PSYCH) = 524]
- Recode current treatment at baseline (*v1\_cur\_psy\_trm*) into dichotomous variable  
*v1\_cur\_psy\_trm\_dich*
- Recode *v1\_gaf*: -999 = missing
- Compute new variable *v1\_age<sup>2</sup>*

```

GET
FILE='phenodata_v1.1.2raw.sav'.
DATASET NAME DataSet1 WINDOW=FRONT.

SAVE OUTFILE='phenodata_v1.1.2prep.sav'
/COMPRESSED
STRING v1_diagn_group (A8).
RECODE v1_scid_dsm_dx_cat ('Depression'='AFF') ('Bipolar-I Disorder'='AFF')
('Bipolar-II '+'
'Disorder'='AFF') (ELSE='PSYCH') INTO v1_diagn_group
VARIABLE LABELS v1_diagn_group 'v1_diagn_group'.
EXECUTE.
FREQUENCIES VARIABLES=v1_scid_dsm_dx_catv1_diagn_group
/ORDER=ANALYSIS.

```

## Häufigkeiten

[DataSet1] phenodata\_v1.1.2prep.sav

### Statistiken

|   |         | v1_scid_dsm_dx_cat | v1_diagn_group |
|---|---------|--------------------|----------------|
| N | Gültig  | 891                | 891            |
|   | Fehlend | 0                  | 0              |

## Häufigkeitstabelle

### v1\_scid\_dsm\_dx\_cat

|        |                           | Häufigkeit | Prozent | Gültige Prozente | Kumulierte Prozente |
|--------|---------------------------|------------|---------|------------------|---------------------|
| Gültig | Bipolar-I Disorder        | 294        | 33,0    | 33,0             | 33,0                |
|        | Bipolar-II Disorder       | 68         | 7,6     | 7,6              | 40,6                |
|        | Brief Psychotic Disorder  | 6          | ,7      | ,7               | 41,3                |
|        | Depression                | 5          | ,6      | ,6               | 41,9                |
|        | Schizoaffective Disorder  | 83         | 9,3     | 9,3              | 51,2                |
|        | Schizophrenia             | 424        | 47,6    | 47,6             | 98,8                |
|        | Schizophreniform Disorder | 11         | 1,2     | 1,2              | 100,0               |
|        | Gesamt                    | 891        | 100,0   | 100,0            |                     |

### v1\_diagn\_group

|        |        | Häufigkeit | Prozent | Gültige<br>Prozente | Kumulierte<br>Prozente |
|--------|--------|------------|---------|---------------------|------------------------|
| Gültig | AFF    | 367        | 41,2    | 41,2                | 41,2                   |
|        | PSYCH  | 524        | 58,8    | 58,8                | 100,0                  |
|        | Gesamt | 891        | 100,0   | 100,0               |                        |

```

STRING v1_cur_psy_trm_dich(A8).
RECODE v1_cur_psy_trm (1='OUT') (2='OUT') (3='HOSP') (4='HOSP') INTO v1_cur
_psy_trm_dich
VARIABLE LABELS v1_cur_psy_trm_dich'v1_cur_psy_trm_dich'.
EXECUTE.
RECODE v1_gaf (-999=SYSMIS).
EXECUTE.
DATASET ACTIVATE DataSet1.

SAVE OUTFILE='phenodata_v1.1.2prep.sav'
/COMPRESSED
COMPUTE V1_age2=v1_ageBL * v1_ageBL.
EXECUTE.
DATASET ACTIVATE DataSet1.

SAVE OUTFILE='phenodata_v1.1.2prep.sav'
/COMPRESSED

```

### 1.2 Preparation schizophrenia polygenic risk scores

- Load data from PRS\_full\_10042017\_corrected\_id.xlsx and save datafile "SZ\_PRS\_full.sav"
- Open "SZ\_PRS\_full.sav"
- Save as "SZ\_PRS\_eleven.sav"
- Only keep PRS at eleven thresholds

### 1.3 Preparation ancestry principal components (Outcome: diagnostic group)

- Load data from PCA\_diagnosis\_corrected\_id.xlsx and save datafile "PCA\_diagnosis.sav"
- ➔ merge data from "phenodata\_v1.1.2\_prep.sav", "SZ\_PRS\_eleven.sav" and "PCA\_diagnosis.sav" by ID and select only subjects with SZ-PRS for new dataset "v1.1.2\_PRS\_diagnosis.sav" (N=771)
- z standardization of PRS and test for normal distribution (Kolmogorov-Smirnov-Test)

```

GET
  FILE='v1.1.2_PRS_diagnosis.sav'
DATASET NAME DataSet1 WINDOW=FRONT.
DESCRIPTIVES VARIABLES=PRS_0.00000005 PRS_0.0001 PRS_0.001 PRS_0.01 PRS_0.0
5 PRS_0.1 PRS_0.2
  PRS_0.3 PRS_0.4 PRS_0.5 PRS_1
  /SAVE
  /STATISTICS=MEAN STDDEV MIN MAX.

```

## Deskriptive Statistik

v1.1.2\_PRS\_diagnosis.sav

### Deskriptive Statistik

|                             | N   | Minimum     | Maximum     | Mittelwert  |
|-----------------------------|-----|-------------|-------------|-------------|
| PRS_0.00000005              | 771 | -,495331000 | ,2734380000 | -,056086510 |
| PRS_0.0001                  | 771 | -1,12710000 | ,9516210000 | -,075368518 |
| PRS_0.001                   | 771 | -2,13727000 | 1,023010000 | -,573469982 |
| PRS_0.01                    | 771 | -4,33932000 | ,9645150000 | -2,17874576 |
| PRS_0.05                    | 771 | -6,59940000 | ,8692340000 | -3,36151863 |
| PRS_0.1                     | 771 | -8,22458000 | ,1052410000 | -4,41306376 |
| PRS_0.2                     | 771 | -9,82038000 | -,659261000 | -5,56061418 |
| PRS_0.3                     | 771 | -10,3739000 | -,862606000 | -6,04116773 |
| PRS_0.4                     | 771 | -11,0241000 | -1,18485000 | -6,52026438 |
| PRS_0.5                     | 771 | -11,0369000 | -1,31570000 | -6,64839291 |
| PRS_1                       | 771 | -11,9026000 | -2,02100000 | -7,44459607 |
| Gültige Werte (Listenweise) | 771 |             |             |             |

## Deskriptive Statistik

|                             | Standardabweichung |
|-----------------------------|--------------------|
| PRS_0.00000005              | ,1157531824        |
| PRS_0.0001                  | ,3198601935        |
| PRS_0.001                   | ,4805996153        |
| PRS_0.01                    | ,7552558326        |
| PRS_0.05                    | 1,042266530        |
| PRS_0.1                     | 1,170141833        |
| PRS_0.2                     | 1,292957858        |
| PRS_0.3                     | 1,341492425        |
| PRS_0.4                     | 1,363782932        |
| PRS_0.5                     | 1,384164255        |
| PRS_1                       | 1,398380061        |
| Gültige Werte (Listenweise) |                    |

\*Nonparametric Tests: One Sample.

NPTESTS

```
/ONESAMPLE TEST (PRS_0.00000005 PRS_0.0001 PRS_0.001 PRS_0.01 PRS_0.05 PRS_0.1 PRS_0.2 PRS_0.3 PRS_0.4 PRS_0.5 PRS_1 ZPRS_0.00000005 ZPRS_0.0001 ZPRS_0.001 ZPRS_0.01 ZPRS_0.05 ZPRS_0.1 ZPRS_0.2 ZPRS_0.3 ZPRS_0.4 ZPRS_0.5 ZPRS_1)
```

```
/MISSING SCOPE=ANALYSIS USERMISSING=EXCLUDE
```

```
/CRITERIA ALPHA=0.05 CILEVEL=95.
```

## Nicht parametrische Tests



### Hypothesentestübersicht

|    | Nullhypothese                                                                                                | Test                                         | Sig.                | Entscheidung              |
|----|--------------------------------------------------------------------------------------------------------------|----------------------------------------------|---------------------|---------------------------|
| 1  | Die Verteilung von PRS_0.00000005 ist normal mit Mittelwert -0,056086510359274 und Standardabweichung 0,116. | Kolmogorov-Smirnov-Test bei einer Stichprobe | ,200 <sup>1,2</sup> | Nullhypothese beibehalten |
| 2  | Die Verteilung von PRS_0.0001 ist normal mit Mittelwert -0,075368518287938 und Standardabweichung 0,320.     | Kolmogorov-Smirnov-Test bei einer Stichprobe | ,200 <sup>1,2</sup> | Nullhypothese beibehalten |
| 3  | Die Verteilung von PRS_0.001 ist normal mit Mittelwert -0,573469982054474 und Standardabweichung 0,481.      | Kolmogorov-Smirnov-Test bei einer Stichprobe | ,200 <sup>1,2</sup> | Nullhypothese beibehalten |
| 4  | Die Verteilung von PRS_0.01 ist normal mit Mittelwert -2,178745758754860 und Standardabweichung 0,755.       | Kolmogorov-Smirnov-Test bei einer Stichprobe | ,200 <sup>1,2</sup> | Nullhypothese beibehalten |
| 5  | Die Verteilung von PRS_0.05 ist normal mit Mittelwert -3,361518626459140 und Standardabweichung 1,042.       | Kolmogorov-Smirnov-Test bei einer Stichprobe | ,200 <sup>1,2</sup> | Nullhypothese beibehalten |
| 6  | Die Verteilung von PRS_0.1 ist normal mit Mittelwert -4,413063756160830 und Standardabweichung 1,170.        | Kolmogorov-Smirnov-Test bei einer Stichprobe | ,200 <sup>1,2</sup> | Nullhypothese beibehalten |
| 7  | Die Verteilung von PRS_0.2 ist normal mit Mittelwert -5,560614177691310 und Standardabweichung 1,293.        | Kolmogorov-Smirnov-Test bei einer Stichprobe | ,200 <sup>1,2</sup> | Nullhypothese beibehalten |
| 8  | Die Verteilung von PRS_0.3 ist normal mit Mittelwert -6,041167725032420 und Standardabweichung 1,341.        | Kolmogorov-Smirnov-Test bei einer Stichprobe | ,200 <sup>1,2</sup> | Nullhypothese beibehalten |
| 9  | Die Verteilung von PRS_0.4 ist normal mit Mittelwert -6,520264383916990 und Standardabweichung 1,364.        | Kolmogorov-Smirnov-Test bei einer Stichprobe | ,200 <sup>1,2</sup> | Nullhypothese beibehalten |
| 10 | Die Verteilung von PRS_0.5 ist normal mit Mittelwert -6,648392905317770 und Standardabweichung 1,384.        | Kolmogorov-Smirnov-Test bei einer Stichprobe | ,200 <sup>1,2</sup> | Nullhypothese beibehalten |
| 11 | Die Verteilung von PRS_1 ist normal mit Mittelwert -7,444596070038920 und Standardabweichung 1,398.          | Kolmogorov-Smirnov-Test bei einer Stichprobe | ,200 <sup>1,2</sup> | Nullhypothese beibehalten |

Asymptotische Signifikanz werden angezeigt. Das Signifikanzniveau ist ,05.

### Hypothesentestübersicht

|    | Nullhypothese                                                                                                    | Test                                         | Sig.                | Entscheidung              |
|----|------------------------------------------------------------------------------------------------------------------|----------------------------------------------|---------------------|---------------------------|
| 12 | Die Verteilung von z-Faktorwert (PRS_0.00000005) ist normal mit Mittelwert 0,00000 und Standardabweichung 1,000. | Kolmogorov-Smirnov-Test bei einer Stichprobe | ,200 <sup>1,2</sup> | Nullhypothese beibehalten |
| 13 | Die Verteilung von z-Faktorwert (PRS_0.0001) ist normal mit Mittelwert 0,00000 und Standardabweichung 1,000.     | Kolmogorov-Smirnov-Test bei einer Stichprobe | ,200 <sup>1,2</sup> | Nullhypothese beibehalten |
| 14 | Die Verteilung von z-Faktorwert (PRS_0.001) ist normal mit Mittelwert 0,00000 und Standardabweichung 1,000.      | Kolmogorov-Smirnov-Test bei einer Stichprobe | ,200 <sup>1,2</sup> | Nullhypothese beibehalten |
| 15 | Die Verteilung von z-Faktorwert (PRS_0.01) ist normal mit Mittelwert -0,00000 und Standardabweichung 1,000.      | Kolmogorov-Smirnov-Test bei einer Stichprobe | ,200 <sup>1,2</sup> | Nullhypothese beibehalten |
| 16 | Die Verteilung von z-Faktorwert (PRS_0.05) ist normal mit Mittelwert -0,00000 und Standardabweichung 1,000.      | Kolmogorov-Smirnov-Test bei einer Stichprobe | ,200 <sup>1,2</sup> | Nullhypothese beibehalten |
| 17 | Die Verteilung von z-Faktorwert (PRS_0.1) ist normal mit Mittelwert -0,00000 und Standardabweichung 1,000.       | Kolmogorov-Smirnov-Test bei einer Stichprobe | ,200 <sup>1,2</sup> | Nullhypothese beibehalten |
| 18 | Die Verteilung von z-Faktorwert (PRS_0.2) ist normal mit Mittelwert 0,00000 und Standardabweichung 1,000.        | Kolmogorov-Smirnov-Test bei einer Stichprobe | ,200 <sup>1,2</sup> | Nullhypothese beibehalten |
| 19 | Die Verteilung von z-Faktorwert (PRS_0.3) ist normal mit Mittelwert 0,00000 und Standardabweichung 1,000.        | Kolmogorov-Smirnov-Test bei einer Stichprobe | ,200 <sup>1,2</sup> | Nullhypothese beibehalten |
| 20 | Die Verteilung von z-Faktorwert (PRS_0.4) ist normal mit Mittelwert 0,00000 und Standardabweichung 1,000.        | Kolmogorov-Smirnov-Test bei einer Stichprobe | ,200 <sup>1,2</sup> | Nullhypothese beibehalten |

Asymptotische Signifikanzniveaus werden angezeigt. Das Signifikanzniveau ist ,05.

<sup>1</sup> Lilliefors korrigiert

<sup>2</sup> Dies ist eine Untergrenze der tatsächlichen Signifikanz.

(continued)

### Hypothesentestübersicht

|           | Nullhypothese                                                                                             | Test                                         | Sig.                | Entscheidung              |
|-----------|-----------------------------------------------------------------------------------------------------------|----------------------------------------------|---------------------|---------------------------|
| <b>21</b> | Die Verteilung von z-Faktorwert (PRS_0.5) ist normal mit Mittelwert 0,00000 und Standardabweichung 1,000. | Kolmogorov-Smirnov-Test bei einer Stichprobe | ,200 <sup>1,2</sup> | Nullhypothese beibehalten |
| <b>22</b> | Die Verteilung von z-Faktorwert (PRS_1) ist normal mit Mittelwert 0,00000 und Standardabweichung 1,000.   | Kolmogorov-Smirnov-Test bei einer Stichprobe | ,200 <sup>1,2</sup> | Nullhypothese beibehalten |

Asymptotische Signifikanzen werden angezeigt. Das Signifikanzniveau ist ,05.

<sup>1</sup> Lilliefors korrigiert

<sup>2</sup> Dies ist eine Untergrenze der tatsächlichen Signifikanz.

```

GET
  FILE='v1.1.2_PRS_diagnosis.sav'.
DATASET NAME DataSet2 WINDOW=FRONT.
DATASET ACTIVATE DataSet2.

SAVE OUTFILE='v1.1.2_PRS_diagnosis.sav'
  /COMPRESSED
DATASET CLOSE DataSet1.
LOGISTIC REGRESSION VARIABLES v1_diagn_group
  /METHOD=ENTER v1_sex v1_ageBL V1_age^2 v1_ageBL*v1_sex PC1 PC2 PC3 PC4 PC5
  /METHOD=ENTER ZPRS_0.00000005
  /CONTRAST (v1_sex)=Indicator
  /CONTRAST (v1_sex)=Indicator
  /PRINT=CI(95)
  /CRITERIA=PIN(0.05) POUT(0.10) ITERATE(20) CUT(0.5).

```

## Logistische Regression

### Warnungen

Kontrast für diese kategoriale Variable bereits angegeben. Der letzte Kontrast wird verwendet.

### Zusammenfassung der Fallverarbeitung

| Ungewichtete Fälle <sup>a</sup> |                       | N   | Prozent |
|---------------------------------|-----------------------|-----|---------|
| Ausgewählte Fälle               | Einbezogen in Analyse | 771 | 100,0   |
|                                 | Fehlende Fälle        | 0   | ,0      |
|                                 | Gesamt                | 771 | 100,0   |
| Nicht ausgewählte Fälle         |                       | 0   | ,0      |
| Gesamt                          |                       | 771 | 100,0   |

a. Wenn die Gewichtung wirksam ist, finden Sie die Gesamtzahl der Fälle in der Klassifizierungstabelle.

### Codierung abhängiger Variablen

| Ursprünglicher Wert | Interner Wert |
|---------------------|---------------|
| AFF                 | 0             |
| PSYCH               | 1             |

## Codierungen kategorialer Variablen

|        |   | Häufigkeit | Parametercodierung<br>(1) |
|--------|---|------------|---------------------------|
| v1_sex | F | 330        | 1,000                     |
|        | M | 441        | ,000                      |

## Block 0: Anfangsblock

### Klassifizierungstabelle<sup>a,b</sup>

|            |                   |       | Vorhergesagt          |       | Prozentsatz der<br>Richtigen |
|------------|-------------------|-------|-----------------------|-------|------------------------------|
| Beobachtet |                   |       | v1_diagn_group<br>AFF | PSYCH |                              |
| Schritt 0  | v1_diagn_group    | AFF   | 0                     | 329   | ,0                           |
|            |                   | PSYCH | 0                     | 442   | 100,0                        |
|            | Gesamtprozentsatz |       |                       |       | 57,3                         |

a. Konstante in das Modell einbezogen.

b. Der Trennwert lautet ,500

### Variablen in der Gleichung

|           |           | Regressionsko<br>effizientB | Standardfehler | Wald   | df | Sig. | Exp(B) |
|-----------|-----------|-----------------------------|----------------|--------|----|------|--------|
| Schritt 0 | Konstante | ,295                        | ,073           | 16,442 | 1  | ,000 | 1,343  |

### Variablen nicht in der Gleichung<sup>a</sup>

|           |           |                       | Wert   | df | Sig. |
|-----------|-----------|-----------------------|--------|----|------|
| Schritt 0 | Variablen | v1_sex(1)             | 5,672  | 1  | ,017 |
|           |           | v1_ageBL              | 24,553 | 1  | ,000 |
|           |           | V1_age <sup>2</sup>   | 26,804 | 1  | ,000 |
|           |           | v1_ageBL by v1_sex(1) | 7,161  | 1  | ,007 |
|           |           | PC1                   | 2,760  | 1  | ,097 |
|           |           | PC2                   | 3,051  | 1  | ,081 |
|           |           | PC3                   | ,485   | 1  | ,486 |
|           |           | PC4                   | 3,426  | 1  | ,064 |
|           |           | PC5                   | 2,437  | 1  | ,118 |

a. Chi-Quadrate der Residuen werden wegen Redundanzen nicht berechnet.

## Block 1: Methode = Einschluß

### Omnibus-Tests der Modellkoeffizienten

|           |         | Chi-Quadrat | df | Sig. |
|-----------|---------|-------------|----|------|
| Schritt 1 | Schritt | 53,870      | 9  | ,000 |
|           | Block   | 53,870      | 9  | ,000 |
|           | Modell  | 53,870      | 9  | ,000 |

### Modellzusammenfassung

| Schritt | -2 Log-Likelihood    | Cox & Snell R-Quadrat | Nagelkerkes R-Quadrat |
|---------|----------------------|-----------------------|-----------------------|
| 1       | 998,341 <sup>a</sup> | ,067                  | ,091                  |

a. Schätzung beendet bei Iteration Nummer 6, weil die Parameterschätzer sich um weniger als ,001 änderten.

### Klassifizierungstabelle<sup>a</sup>

|           |                   |       | Vorhergesagt          |       | Prozentsatz der Richtigen |
|-----------|-------------------|-------|-----------------------|-------|---------------------------|
|           |                   |       | v1_diagn_group<br>AFF | PSYCH |                           |
| Schritt 1 | v1_diagn_group    | AFF   | 109                   | 220   | 33,1                      |
|           |                   | PSYCH | 76                    | 366   | 82,8                      |
|           | Gesamtprozentsatz |       |                       |       | 61,6                      |

a. Der Trennwert lautet ,500

### Variablen in der Gleichung

|                        |                       | Regressionsko<br>effizientB | Standardfehler | Wald  | df |
|------------------------|-----------------------|-----------------------------|----------------|-------|----|
| Schritt 1 <sup>a</sup> | v1_sex(1)             | -1,370                      | ,565           | 5,885 | 1  |
|                        | v1_ageBL              | ,026                        | ,037           | ,504  | 1  |
|                        | V1_age <sup>2</sup>   | -,001                       | ,000           | 3,123 | 1  |
|                        | v1_ageBL by v1_sex(1) | ,024                        | ,012           | 3,748 | 1  |
|                        | PC1                   | 3,160                       | 4,592          | ,474  | 1  |
|                        | PC2                   | 4,755                       | 2,431          | 3,828 | 1  |
|                        | PC3                   | -4,365                      | 3,213          | 1,845 | 1  |
|                        | PC4                   | 12,056                      | 4,446          | 7,353 | 1  |
|                        | PC5                   | 8,462                       | 3,484          | 5,898 | 1  |
|                        | Konstante             | ,789                        | ,783           | 1,014 | 1  |

### Variablen in der Gleichung

|                        |                       |      |            | 95% Konfidenzintervall für EXP (B) |             |
|------------------------|-----------------------|------|------------|------------------------------------|-------------|
|                        |                       | Sig. | Exp(B)     | Unterer Wert                       | Oberer Wert |
| Schritt 1 <sup>a</sup> | v1_sex(1)             | ,015 | ,254       | ,084                               | ,769        |
|                        | v1_ageBL              | ,478 | 1,026      | ,955                               | 1,103       |
|                        | V1_age <sup>2</sup>   | ,077 | ,999       | ,998                               | 1,000       |
|                        | v1_ageBL by v1_sex(1) | ,053 | 1,024      | 1,000                              | 1,049       |
|                        | PC1                   | ,491 | 23,572     | ,003                               | 191107,252  |
|                        | PC2                   | ,050 | 116,217    | ,992                               | 13621,106   |
|                        | PC3                   | ,174 | ,013       | ,000                               | 6,907       |
|                        | PC4                   | ,007 | 172069,732 | 28,274                             | 1047189713  |
|                        | PC5                   | ,015 | 4730,085   | 5,117                              | 4372272,224 |
|                        | Konstante             | ,314 | 2,200      |                                    |             |

a. In Schritt 1 eingegebene Variablen: v1\_sex, v1\_ageBL, V1\_age<sup>2</sup>, v1\_ageBL \* v1\_sex, PC1, PC2, PC3, PC4, PC5.

## Block 2: Methode = Einschluß

### Omnibus-Tests der Modellkoeffizienten

|           |         | Chi-Quadrat | df | Sig. |
|-----------|---------|-------------|----|------|
| Schritt 1 | Schritt | 4,623       | 1  | ,032 |
|           | Block   | 4,623       | 1  | ,032 |
|           | Modell  | 58,493      | 10 | ,000 |

### Modellzusammenfassung

| Schritt | -2 Log-Likelihood    | Cox & Snell R-Quadrat | Nagelkerkes R-Quadrat |
|---------|----------------------|-----------------------|-----------------------|
| 1       | 993,719 <sup>a</sup> | ,073                  | ,098                  |

a. Schätzung beendet bei Iteration Nummer 6, weil die Parameterschätzer sich um weniger als ,001 änderten.

## Klassifizierungstabelle<sup>a</sup>

| Beobachtet |                   |       | Vorhergesagt          |       | Prozentsatz der<br>Richtigen |
|------------|-------------------|-------|-----------------------|-------|------------------------------|
|            |                   |       | v1_diagn_group<br>AFF | PSYCH |                              |
| Schritt 1  | v1_diagn_group    | AFF   | 118                   | 211   | 35,9                         |
|            |                   | PSYCH | 83                    | 359   | 81,2                         |
|            | Gesamtprozentsatz |       |                       |       | 61,9                         |

a. Der Trennwert lautet ,500

## Variablen in der Gleichung

|                        |                                  | Regressionsko<br>effizientB | Standardfehler | Wald  | df |
|------------------------|----------------------------------|-----------------------------|----------------|-------|----|
| Schritt 1 <sup>a</sup> | v1_sex(1)                        | -1,357                      | ,566           | 5,742 | 1  |
|                        | v1_ageBL                         | ,028                        | ,037           | ,591  | 1  |
|                        | V1_age <sup>2</sup>              | -,001                       | ,000           | 3,299 | 1  |
|                        | v1_ageBL by v1_sex(1)            | ,024                        | ,012           | 3,595 | 1  |
|                        | PC1                              | 3,386                       | 5,027          | ,454  | 1  |
|                        | PC2                              | 5,018                       | 2,464          | 4,149 | 1  |
|                        | PC3                              | -4,511                      | 3,253          | 1,923 | 1  |
|                        | PC4                              | 11,847                      | 4,460          | 7,057 | 1  |
|                        | PC5                              | 8,249                       | 3,493          | 5,576 | 1  |
|                        | z-Faktorwert(PRS_0.<br>00000005) | ,164                        | ,077           | 4,576 | 1  |
|                        | Konstante                        | ,742                        | ,787           | ,889  | 1  |



### Variablen in der Gleichung

|                        |                              |      |            | 95% Konfidenzintervall für EXP (B) |             |
|------------------------|------------------------------|------|------------|------------------------------------|-------------|
|                        |                              | Sig. | Exp(B)     | Unterer Wert                       | Oberer Wert |
| Schritt 1 <sup>a</sup> | v1_sex(1)                    | ,017 | ,257       | ,085                               | ,781        |
|                        | v1_ageBL                     | ,442 | 1,029      | ,957                               | 1,106       |
|                        | V1_age <sup>2</sup>          | ,069 | ,999       | ,998                               | 1,000       |
|                        | v1_ageBL by v1_sex(1)        | ,058 | 1,024      | ,999                               | 1,049       |
|                        | PC1                          | ,501 | 29,547     | ,002                               | 561672,419  |
|                        | PC2                          | ,042 | 151,091    | 1,208                              | 18891,986   |
|                        | PC3                          | ,166 | ,011       | ,000                               | 6,459       |
|                        | PC4                          | ,008 | 139646,935 | 22,332                             | 873254546,8 |
|                        | PC5                          | ,018 | 3823,901   | 4,064                              | 3597661,802 |
|                        | z-Faktorwert(PRS_0.00000005) | ,032 | 1,178      | 1,014                              | 1,369       |
|                        | Konstante                    | ,346 | 2,100      |                                    |             |

a. In Schritt 1 eingegebene Variablen: z-Faktorwert(PRS\_0.00000005).

```
LOGISTIC REGRESSION VARIABLES v1_diagn_group
/METHOD=ENTER v1_sex v1_ageBL V1_age2 v1_ageBL*v1_sex PC1 PC2 PC3 PC4 PC5
/METHOD=ENTER ZPRS_0.0001
/CONTRAST (v1_sex)=Indicator
/CONTRAST (v1_sex)=Indicator
/PRINT=CI(95)
/CRITERIA=PIN(0.05) POUT(0.10) ITERATE(20) CUT(0.5).
```

## Logistische Regression

### Warnungen

Kontrast für diese kategoriale Variable bereits angegeben. Der letzte Kontrast wird verwendet.

### Zusammenfassung der Fallverarbeitung

| Ungewichtete Fälle <sup>a</sup> |                       | N   | Prozent |
|---------------------------------|-----------------------|-----|---------|
| Ausgewählte Fälle               | Einbezogen in Analyse | 771 | 100,0   |
|                                 | Fehlende Fälle        | 0   | ,0      |
|                                 | Gesamt                | 771 | 100,0   |
| Nicht ausgewählte Fälle         |                       | 0   | ,0      |
| Gesamt                          |                       | 771 | 100,0   |

a. Wenn die Gewichtung wirksam ist, finden Sie die Gesamtzahl der Fälle in der Klassifizierungstabelle.

### Codierung abhängiger Variablen

| Ursprünglicher Wert | Interner Wert |
|---------------------|---------------|
| AFF                 | 0             |
| PSYCH               | 1             |

### Codierungen kategorialer Variablen

|        |   | Häufigkeit | Parametercodierung<br>(1) |
|--------|---|------------|---------------------------|
| v1_sex | F | 330        | 1,000                     |
|        | M | 441        | ,000                      |

## Block 0: Anfangsblock

### Klassifizierungstabelle<sup>a,b</sup>

| Beobachtet |                   |       | Vorhergesagt          |       | Prozentsatz der<br>Richtigen |
|------------|-------------------|-------|-----------------------|-------|------------------------------|
|            |                   |       | v1_diagn_group<br>AFF | PSYCH |                              |
| Schritt 0  | v1_diagn_group    | AFF   | 0                     | 329   | ,0                           |
|            |                   | PSYCH | 0                     | 442   | 100,0                        |
|            | Gesamtprozentsatz |       |                       |       | 57,3                         |

a. Konstante in das Modell einbezogen.

b. Der Trennwert lautet ,500

### Variablen in der Gleichung

|           |           | Regressionsko-<br>effizientB | Standardfehler | Wald   | df | Sig. | Exp(B) |
|-----------|-----------|------------------------------|----------------|--------|----|------|--------|
| Schritt 0 | Konstante | ,295                         | ,073           | 16,442 | 1  | ,000 | 1,343  |

### Variablen nicht in der Gleichung<sup>a</sup>

|           |           |                       | Wert   | df | Sig. |
|-----------|-----------|-----------------------|--------|----|------|
| Schritt 0 | Variablen | v1_sex(1)             | 5,672  | 1  | ,017 |
|           |           | v1_ageBL              | 24,553 | 1  | ,000 |
|           |           | V1_age <sup>2</sup>   | 26,804 | 1  | ,000 |
|           |           | v1_ageBL by v1_sex(1) | 7,161  | 1  | ,007 |
|           |           | PC1                   | 2,760  | 1  | ,097 |
|           |           | PC2                   | 3,051  | 1  | ,081 |
|           |           | PC3                   | ,485   | 1  | ,486 |
|           |           | PC4                   | 3,426  | 1  | ,064 |
|           |           | PC5                   | 2,437  | 1  | ,118 |

a. Chi-Quadrate der Residuen werden wegen Redundanzen nicht berechnet.

## Block 1: Methode = Einschluß

### Omnibus-Tests der Modellkoeffizienten

|           |         | Chi-Quadrat | df | Sig. |
|-----------|---------|-------------|----|------|
| Schritt 1 | Schritt | 53,870      | 9  | ,000 |
|           | Block   | 53,870      | 9  | ,000 |
|           | Modell  | 53,870      | 9  | ,000 |

### Modellzusammenfassung

| Schritt | -2 Log-Likelihood    | Cox & Snell R-Quadrat | Nagelkerkes R-Quadrat |
|---------|----------------------|-----------------------|-----------------------|
| 1       | 998,341 <sup>a</sup> | ,067                  | ,091                  |

a. Schätzung beendet bei Iteration Nummer 6, weil die Parameterschätzer sich um weniger als ,001 änderten.

### Klassifizierungstabelle<sup>a</sup>

|            |                   |       | Vorhergesagt   |       |                           |
|------------|-------------------|-------|----------------|-------|---------------------------|
| Beobachtet |                   |       | v1_diagn_group |       | Prozentsatz der Richtigen |
|            |                   |       | AFF            | PSYCH |                           |
| Schritt 1  | v1_diagn_group    | AFF   | 109            | 220   | 33,1                      |
|            |                   | PSYCH | 76             | 366   | 82,8                      |
|            | Gesamtprozentsatz |       |                |       | 61,6                      |

a. Der Trennwert lautet ,500

### Variablen in der Gleichung

|                        |                       | Regressionsko<br>effizientB | Standardfehler | Wald  | df |
|------------------------|-----------------------|-----------------------------|----------------|-------|----|
| Schritt 1 <sup>a</sup> | v1_sex(1)             | -1,370                      | ,565           | 5,885 | 1  |
|                        | v1_ageBL              | ,026                        | ,037           | ,504  | 1  |
|                        | V1_age <sup>2</sup>   | -,001                       | ,000           | 3,123 | 1  |
|                        | v1_ageBL by v1_sex(1) | ,024                        | ,012           | 3,748 | 1  |
|                        | PC1                   | 3,160                       | 4,592          | ,474  | 1  |
|                        | PC2                   | 4,755                       | 2,431          | 3,828 | 1  |
|                        | PC3                   | -4,365                      | 3,213          | 1,845 | 1  |
|                        | PC4                   | 12,056                      | 4,446          | 7,353 | 1  |
|                        | PC5                   | 8,462                       | 3,484          | 5,898 | 1  |
|                        | Konstante             | ,789                        | ,783           | 1,014 | 1  |

### Variablen in der Gleichung

|                        |                       | Sig. | Exp(B)     | 95% Konfidenzintervall für EXP<br>(B) |             |
|------------------------|-----------------------|------|------------|---------------------------------------|-------------|
|                        |                       |      |            | Unterer Wert                          | Oberer Wert |
| Schritt 1 <sup>a</sup> | v1_sex(1)             | ,015 | ,254       | ,084                                  | ,769        |
|                        | v1_ageBL              | ,478 | 1,026      | ,955                                  | 1,103       |
|                        | V1_age <sup>2</sup>   | ,077 | ,999       | ,998                                  | 1,000       |
|                        | v1_ageBL by v1_sex(1) | ,053 | 1,024      | 1,000                                 | 1,049       |
|                        | PC1                   | ,491 | 23,572     | ,003                                  | 191107,252  |
|                        | PC2                   | ,050 | 116,217    | ,992                                  | 13621,106   |
|                        | PC3                   | ,174 | ,013       | ,000                                  | 6,907       |
|                        | PC4                   | ,007 | 172069,732 | 28,274                                | 1047189713  |
|                        | PC5                   | ,015 | 4730,085   | 5,117                                 | 4372272,224 |
|                        | Konstante             | ,314 | 2,200      |                                       |             |

a. In Schritt 1 eingegebene Variablen: v1\_sex, v1\_ageBL, V1\_age<sup>2</sup>, v1\_ageBL \* v1\_sex, PC1, PC2, PC3, PC4, PC5.

## Block 2: Methode = Einschluß

### Omnibus-Tests der Modellkoeffizienten

|           |         | Chi-Quadrat | df | Sig. |
|-----------|---------|-------------|----|------|
| Schritt 1 | Schritt | 1,185       | 1  | ,276 |
|           | Block   | 1,185       | 1  | ,276 |
|           | Modell  | 55,055      | 10 | ,000 |

## Modellzusammenfassung

| Schritt | -2 Log-Likelihood    | Cox & Snell R-Quadrat | Nagelkerkes R-Quadrat |
|---------|----------------------|-----------------------|-----------------------|
| 1       | 997,156 <sup>a</sup> | ,069                  | ,093                  |

a. Schätzung beendet bei Iteration Nummer 6, weil die Parameterschätzer sich um weniger als ,001 änderten.

## Klassifizierungstabelle<sup>a</sup>

|                   |                |       | Vorhergesagt          |       | Prozentsatz der Richtigen |
|-------------------|----------------|-------|-----------------------|-------|---------------------------|
|                   |                |       | v1_diagn_group<br>AFF | PSYCH |                           |
| Schritt 1         | Beobachtet     |       |                       |       |                           |
|                   | v1_diagn_group | AFF   | 104                   | 225   | 31,6                      |
|                   |                | PSYCH | 76                    | 366   | 82,8                      |
| Gesamtprozentsatz |                |       |                       |       | 61,0                      |

a. Der Trennwert lautet ,500

## Variablen in der Gleichung

|                        |                          | Regressionsko<br>effizientB | Standardfehler | Wald  | df |
|------------------------|--------------------------|-----------------------------|----------------|-------|----|
| Schritt 1 <sup>a</sup> | v1_sex(1)                | -1,362                      | ,565           | 5,805 | 1  |
|                        | v1_ageBL                 | ,028                        | ,037           | ,596  | 1  |
|                        | V1_age <sup>2</sup>      | -,001                       | ,000           | 3,311 | 1  |
|                        | v1_ageBL by v1_sex(1)    | ,024                        | ,012           | 3,711 | 1  |
|                        | PC1                      | 3,122                       | 4,826          | ,418  | 1  |
|                        | PC2                      | 4,914                       | 2,450          | 4,023 | 1  |
|                        | PC3                      | -4,487                      | 3,233          | 1,926 | 1  |
|                        | PC4                      | 12,265                      | 4,462          | 7,555 | 1  |
|                        | PC5                      | 8,415                       | 3,485          | 5,831 | 1  |
|                        | z-Faktorwert(PRS_0.0001) | ,083                        | ,076           | 1,182 | 1  |
|                        | Konstante                | ,733                        | ,784           | ,874  | 1  |

### Variablen in der Gleichung

|                        |                          |      |            | 95% Konfidenzintervall für EXP (B) |             |
|------------------------|--------------------------|------|------------|------------------------------------|-------------|
|                        |                          | Sig. | Exp(B)     | Unterer Wert                       | Oberer Wert |
| Schritt 1 <sup>a</sup> | v1_sex(1)                | ,016 | ,256       | ,085                               | ,776        |
|                        | v1_ageBL                 | ,440 | 1,029      | ,957                               | 1,106       |
|                        | V1_age <sup>2</sup>      | ,069 | ,999       | ,998                               | 1,000       |
|                        | v1_ageBL by v1_sex(1)    | ,054 | 1,024      | 1,000                              | 1,049       |
|                        | PC1                      | ,518 | 22,689     | ,002                               | 291037,297  |
|                        | PC2                      | ,045 | 136,221    | 1,118                              | 16591,554   |
|                        | PC3                      | ,165 | ,011       | ,000                               | 6,354       |
|                        | PC4                      | ,006 | 212044,866 | 33,749                             | 1332289580  |
|                        | PC5                      | ,016 | 4513,317   | 4,878                              | 4175617,044 |
|                        | z-Faktorwert(PRS_0.0001) | ,277 | 1,086      | ,936                               | 1,261       |
|                        | Konstante                | ,350 | 2,082      |                                    |             |

a. In Schritt 1 eingegebene Variablen: z-Faktorwert(PRS\_0.0001).

```
LOGISTIC REGRESSION VARIABLES v1_diagn_group
/METHOD=ENTER v1_sex v1_ageBL V1_age2 v1_ageBL*v1_sex PC1 PC2 PC3 PC4 PC5
/METHOD=ENTER ZPRS_0.001
/CONTRAST (v1_sex)=Indicator
/CONTRAST (v1_sex)=Indicator
/PRINT=CI(95)
/CRITERIA=PIN(0.05) POUT(0.10) ITERATE(20) CUT(0.5).
```

## Logistische Regression

### Warnungen

Kontrast für diese kategoriale Variable bereits angegeben. Der letzte Kontrast wird verwendet.

### Zusammenfassung der Fallverarbeitung

| Ungewichtete Fälle <sup>a</sup> |                       | N   | Prozent |
|---------------------------------|-----------------------|-----|---------|
| Ausgewählte Fälle               | Einbezogen in Analyse | 771 | 100,0   |
|                                 | Fehlende Fälle        | 0   | ,0      |
|                                 | Gesamt                | 771 | 100,0   |
| Nicht ausgewählte Fälle         |                       | 0   | ,0      |
| Gesamt                          |                       | 771 | 100,0   |

a. Wenn die Gewichtung wirksam ist, finden Sie die Gesamtzahl der Fälle in der Klassifizierungstabelle.

### Codierung abhängiger Variablen

| Ursprünglicher Wert | Interner Wert |
|---------------------|---------------|
| AFF                 | 0             |
| PSYCH               | 1             |

### Codierungen kategorialer Variablen

|        |   | Häufigkeit | Parametercodierung<br>(1) |
|--------|---|------------|---------------------------|
| v1_sex | F | 330        | 1,000                     |
|        | M | 441        | ,000                      |

## Block 0: Anfangsblock

### Klassifizierungstabelle<sup>a,b</sup>

| Beobachtet |                   |       | Vorhergesagt          |       | Prozentsatz der<br>Richtigen |
|------------|-------------------|-------|-----------------------|-------|------------------------------|
|            |                   |       | v1_diagn_group<br>AFF | PSYCH |                              |
| Schritt 0  | v1_diagn_group    | AFF   | 0                     | 329   | ,0                           |
|            |                   | PSYCH | 0                     | 442   | 100,0                        |
|            | Gesamtprozentsatz |       |                       |       | 57,3                         |

a. Konstante in das Modell einbezogen.

b. Der Trennwert lautet ,500

### Variablen in der Gleichung

|           |           | Regressionsko<br>effizientB | Standardfehler | Wald   | df | Sig. | Exp(B) |
|-----------|-----------|-----------------------------|----------------|--------|----|------|--------|
| Schritt 0 | Konstante | ,295                        | ,073           | 16,442 | 1  | ,000 | 1,343  |

### Variablen nicht in der Gleichung<sup>a</sup>

|           |           |                       | Wert   | df | Sig. |
|-----------|-----------|-----------------------|--------|----|------|
| Schritt 0 | Variablen | v1_sex(1)             | 5,672  | 1  | ,017 |
|           |           | v1_ageBL              | 24,553 | 1  | ,000 |
|           |           | V1_age <sup>2</sup>   | 26,804 | 1  | ,000 |
|           |           | v1_ageBL by v1_sex(1) | 7,161  | 1  | ,007 |
|           |           | PC1                   | 2,760  | 1  | ,097 |
|           |           | PC2                   | 3,051  | 1  | ,081 |
|           |           | PC3                   | ,485   | 1  | ,486 |
|           |           | PC4                   | 3,426  | 1  | ,064 |
|           |           | PC5                   | 2,437  | 1  | ,118 |

a. Chi-Quadrate der Residuen werden wegen Redundanzen nicht berechnet.

## Block 1: Methode = Einschluß

### Omnibus-Tests der Modellkoeffizienten

|           |         | Chi-Quadrat | df | Sig. |
|-----------|---------|-------------|----|------|
| Schritt 1 | Schritt | 53,870      | 9  | ,000 |
|           | Block   | 53,870      | 9  | ,000 |
|           | Modell  | 53,870      | 9  | ,000 |

### Modellzusammenfassung

| Schritt | -2 Log-Likelihood    | Cox & Snell R-Quadrat | Nagelkerkes R-Quadrat |
|---------|----------------------|-----------------------|-----------------------|
| 1       | 998,341 <sup>a</sup> | ,067                  | ,091                  |

a. Schätzung beendet bei Iteration Nummer 6, weil die Parameterschätzer sich um weniger als ,001 änderten.

### Klassifizierungstabelle<sup>a</sup>

|           |                   |       | Vorhergesagt          |       | Prozentsatz der Richtigen |
|-----------|-------------------|-------|-----------------------|-------|---------------------------|
|           |                   |       | v1_diagn_group<br>AFF | PSYCH |                           |
| Schritt 1 | v1_diagn_group    | AFF   | 109                   | 220   | 33,1                      |
|           |                   | PSYCH | 76                    | 366   | 82,8                      |
|           | Gesamtprozentsatz |       |                       |       | 61,6                      |

a. Der Trennwert lautet ,500



### Variablen in der Gleichung

|                        |                       | Regressionsko<br>effizientB | Standardfehler | Wald  | df |
|------------------------|-----------------------|-----------------------------|----------------|-------|----|
| Schritt 1 <sup>a</sup> | v1_sex(1)             | -1,370                      | ,565           | 5,885 | 1  |
|                        | v1_ageBL              | ,026                        | ,037           | ,504  | 1  |
|                        | V1_age <sup>2</sup>   | -,001                       | ,000           | 3,123 | 1  |
|                        | v1_ageBL by v1_sex(1) | ,024                        | ,012           | 3,748 | 1  |
|                        | PC1                   | 3,160                       | 4,592          | ,474  | 1  |
|                        | PC2                   | 4,755                       | 2,431          | 3,828 | 1  |
|                        | PC3                   | -4,365                      | 3,213          | 1,845 | 1  |
|                        | PC4                   | 12,056                      | 4,446          | 7,353 | 1  |
|                        | PC5                   | 8,462                       | 3,484          | 5,898 | 1  |
|                        | Konstante             | ,789                        | ,783           | 1,014 | 1  |

### Variablen in der Gleichung

|                        |                       | Sig. | Exp(B)     | 95% Konfidenzintervall für EXP<br>(B) |             |
|------------------------|-----------------------|------|------------|---------------------------------------|-------------|
|                        |                       |      |            | Unterer Wert                          | Oberer Wert |
| Schritt 1 <sup>a</sup> | v1_sex(1)             | ,015 | ,254       | ,084                                  | ,769        |
|                        | v1_ageBL              | ,478 | 1,026      | ,955                                  | 1,103       |
|                        | V1_age <sup>2</sup>   | ,077 | ,999       | ,998                                  | 1,000       |
|                        | v1_ageBL by v1_sex(1) | ,053 | 1,024      | 1,000                                 | 1,049       |
|                        | PC1                   | ,491 | 23,572     | ,003                                  | 191107,252  |
|                        | PC2                   | ,050 | 116,217    | ,992                                  | 13621,106   |
|                        | PC3                   | ,174 | ,013       | ,000                                  | 6,907       |
|                        | PC4                   | ,007 | 172069,732 | 28,274                                | 1047189713  |
|                        | PC5                   | ,015 | 4730,085   | 5,117                                 | 4372272,224 |
|                        | Konstante             | ,314 | 2,200      |                                       |             |

a. In Schritt 1 eingegebene Variablen: v1\_sex, v1\_ageBL, V1\_age<sup>2</sup>, v1\_ageBL \* v1\_sex, PC1, PC2, PC3, PC4, PC5.

## Block 2: Methode = Einschluß

### Omnibus-Tests der Modellkoeffizienten

|           |         | Chi-Quadrat | df | Sig. |
|-----------|---------|-------------|----|------|
| Schritt 1 | Schritt | 9,026       | 1  | ,003 |
|           | Block   | 9,026       | 1  | ,003 |
|           | Modell  | 62,897      | 10 | ,000 |

## Modellzusammenfassung

| Schritt | -2 Log-Likelihood    | Cox & Snell R-Quadrat | Nagelkerkes R-Quadrat |
|---------|----------------------|-----------------------|-----------------------|
| 1       | 989,315 <sup>a</sup> | ,078                  | ,105                  |

a. Schätzung beendet bei Iteration Nummer 6, weil die Parameterschätzer sich um weniger als ,001 änderten.

## Klassifizierungstabelle<sup>a</sup>

|           |                   |                       | Vorhergesagt          |       | Prozentsatz der Richtigen |
|-----------|-------------------|-----------------------|-----------------------|-------|---------------------------|
|           |                   |                       | v1_diagn_group<br>AFF | PSYCH |                           |
| Schritt 1 | Beobachtet        | v1_diagn_group<br>AFF | 126                   | 203   | 38,3                      |
|           |                   | PSYCH                 | 78                    | 364   | 82,4                      |
|           | Gesamtprozentsatz |                       |                       |       | 63,6                      |

a. Der Trennwert lautet ,500

## Variablen in der Gleichung

|                        |                         | Regressionsko<br>effizientB | Standardfehler | Wald  | df |
|------------------------|-------------------------|-----------------------------|----------------|-------|----|
| Schritt 1 <sup>a</sup> | v1_sex(1)               | -1,402                      | ,568           | 6,101 | 1  |
|                        | v1_ageBL                | ,029                        | ,037           | ,634  | 1  |
|                        | V1_age <sup>2</sup>     | -,001                       | ,000           | 3,371 | 1  |
|                        | v1_ageBL by v1_sex(1)   | ,025                        | ,012           | 4,115 | 1  |
|                        | PC1                     | 3,127                       | 5,103          | ,375  | 1  |
|                        | PC2                     | 5,778                       | 2,515          | 5,277 | 1  |
|                        | PC3                     | -5,105                      | 3,302          | 2,390 | 1  |
|                        | PC4                     | 12,870                      | 4,494          | 8,199 | 1  |
|                        | PC5                     | 8,805                       | 3,487          | 6,375 | 1  |
|                        | z-Faktorwert(PRS_0.001) | ,233                        | ,078           | 8,867 | 1  |
|                        | Konstante               | ,703                        | ,785           | ,801  | 1  |

### Variablen in der Gleichung

|                        |                         |      |            | 95% Konfidenzintervall für EXP (B) |             |
|------------------------|-------------------------|------|------------|------------------------------------|-------------|
|                        |                         | Sig. | Exp(B)     | Unterer Wert                       | Oberer Wert |
| Schritt 1 <sup>a</sup> | v1_sex(1)               | ,014 | ,246       | ,081                               | ,749        |
|                        | v1_ageBL                | ,426 | 1,030      | ,958                               | 1,107       |
|                        | V1_age <sup>2</sup>     | ,066 | ,999       | ,998                               | 1,000       |
|                        | v1_ageBL by v1_sex(1)   | ,042 | 1,026      | 1,001                              | 1,051       |
|                        | PC1                     | ,540 | 22,794     | ,001                               | 503110,776  |
|                        | PC2                     | ,022 | 323,094    | 2,335                              | 44704,665   |
|                        | PC3                     | ,122 | ,006       | ,000                               | 3,924       |
|                        | PC4                     | ,004 | 388350,549 | 58,011                             | 2599772723  |
|                        | PC5                     | ,012 | 6670,549   | 7,173                              | 6203170,476 |
|                        | z-Faktorwert(PRS_0.001) | ,003 | 1,262      | 1,083                              | 1,471       |
|                        | Konstante               | ,371 | 2,019      |                                    |             |

a. In Schritt 1 eingegebene Variablen: z-Faktorwert(PRS\_0.001).

```
LOGISTIC REGRESSION VARIABLES v1_diagn_group
/METHOD=ENTER v1_sex v1_ageBL V1_age2 v1_ageBL*v1_sex PC1 PC2 PC3 PC4 PC5
/METHOD=ENTER ZPRS_0.01
/CONTRAST (v1_sex)=Indicator
/CONTRAST (v1_sex)=Indicator
/PRINT=CI(95)
/CRITERIA=PIN(0.05) POUT(0.10) ITERATE(20) CUT(0.5).
```

## Logistische Regression

### Warnungen

Kontrast für diese kategoriale Variable bereits angegeben. Der letzte Kontrast wird verwendet.

### Zusammenfassung der Fallverarbeitung

| Ungewichtete Fälle <sup>a</sup> |                       | N   | Prozent |
|---------------------------------|-----------------------|-----|---------|
| Ausgewählte Fälle               | Einbezogen in Analyse | 771 | 100,0   |
|                                 | Fehlende Fälle        | 0   | ,0      |
|                                 | Gesamt                | 771 | 100,0   |
| Nicht ausgewählte Fälle         |                       | 0   | ,0      |
| Gesamt                          |                       | 771 | 100,0   |

a. Wenn die Gewichtung wirksam ist, finden Sie die Gesamtzahl der Fälle in der Klassifizierungstabelle.

### Codierung abhängiger Variablen

| Ursprünglicher Wert | Interner Wert |
|---------------------|---------------|
| AFF                 | 0             |
| PSYCH               | 1             |

### Codierungen kategorialer Variablen

|        |   | Häufigkeit | Parametercodierung<br>(1) |
|--------|---|------------|---------------------------|
| v1_sex | F | 330        | 1,000                     |
|        | M | 441        | ,000                      |

## Block 0: Anfangsblock

### Klassifizierungstabelle<sup>a,b</sup>

| Beobachtet |                   |       | Vorhergesagt          |       | Prozentsatz der<br>Richtigen |
|------------|-------------------|-------|-----------------------|-------|------------------------------|
|            |                   |       | v1_diagn_group<br>AFF | PSYCH |                              |
| Schritt 0  | v1_diagn_group    | AFF   | 0                     | 329   | ,0                           |
|            |                   | PSYCH | 0                     | 442   | 100,0                        |
|            | Gesamtprozentsatz |       |                       |       | 57,3                         |

a. Konstante in das Modell einbezogen.

b. Der Trennwert lautet ,500

### Variablen in der Gleichung

|           |           | Regressionsko-<br>effizientB | Standardfehler | Wald   | df | Sig. | Exp(B) |
|-----------|-----------|------------------------------|----------------|--------|----|------|--------|
| Schritt 0 | Konstante | ,295                         | ,073           | 16,442 | 1  | ,000 | 1,343  |

### Variablen nicht in der Gleichung<sup>a</sup>

|           |           |                       | Wert   | df | Sig. |
|-----------|-----------|-----------------------|--------|----|------|
| Schritt 0 | Variablen | v1_sex(1)             | 5,672  | 1  | ,017 |
|           |           | v1_ageBL              | 24,553 | 1  | ,000 |
|           |           | V1_age <sup>2</sup>   | 26,804 | 1  | ,000 |
|           |           | v1_ageBL by v1_sex(1) | 7,161  | 1  | ,007 |
|           |           | PC1                   | 2,760  | 1  | ,097 |
|           |           | PC2                   | 3,051  | 1  | ,081 |
|           |           | PC3                   | ,485   | 1  | ,486 |
|           |           | PC4                   | 3,426  | 1  | ,064 |
|           |           | PC5                   | 2,437  | 1  | ,118 |

a. Chi-Quadrate der Residuen werden wegen Redundanzen nicht berechnet.

## Block 1: Methode = Einschluß

### Omnibus-Tests der Modellkoeffizienten

|           |         | Chi-Quadrat | df | Sig. |
|-----------|---------|-------------|----|------|
| Schritt 1 | Schritt | 53,870      | 9  | ,000 |
|           | Block   | 53,870      | 9  | ,000 |
|           | Modell  | 53,870      | 9  | ,000 |

### Modellzusammenfassung

| Schritt | -2 Log-Likelihood    | Cox & Snell R-Quadrat | Nagelkerkes R-Quadrat |
|---------|----------------------|-----------------------|-----------------------|
| 1       | 998,341 <sup>a</sup> | ,067                  | ,091                  |

a. Schätzung beendet bei Iteration Nummer 6, weil die Parameterschätzer sich um weniger als ,001 änderten.

### Klassifizierungstabelle<sup>a</sup>

|            |                   |       | Vorhergesagt   |       |                           |
|------------|-------------------|-------|----------------|-------|---------------------------|
|            |                   |       | v1_diagn_group |       | Prozentsatz der Richtigen |
| Beobachtet |                   |       | AFF            | PSYCH |                           |
| Schritt 1  | v1_diagn_group    | AFF   | 109            | 220   | 33,1                      |
|            |                   | PSYCH | 76             | 366   | 82,8                      |
|            | Gesamtprozentsatz |       |                |       | 61,6                      |

a. Der Trennwert lautet ,500

### Variablen in der Gleichung

|                        |                       | Regressionsko-<br>effizientB | Standardfehler | Wald  | df |
|------------------------|-----------------------|------------------------------|----------------|-------|----|
| Schritt 1 <sup>a</sup> | v1_sex(1)             | -1,370                       | ,565           | 5,885 | 1  |
|                        | v1_ageBL              | ,026                         | ,037           | ,504  | 1  |
|                        | V1_age <sup>2</sup>   | -,001                        | ,000           | 3,123 | 1  |
|                        | v1_ageBL by v1_sex(1) | ,024                         | ,012           | 3,748 | 1  |
|                        | PC1                   | 3,160                        | 4,592          | ,474  | 1  |
|                        | PC2                   | 4,755                        | 2,431          | 3,828 | 1  |
|                        | PC3                   | -4,365                       | 3,213          | 1,845 | 1  |
|                        | PC4                   | 12,056                       | 4,446          | 7,353 | 1  |
|                        | PC5                   | 8,462                        | 3,484          | 5,898 | 1  |
|                        | Konstante             | ,789                         | ,783           | 1,014 | 1  |

### Variablen in der Gleichung

|                        |                       | Sig. | Exp(B)     | 95% Konfidenzintervall für EXP<br>(B) |             |
|------------------------|-----------------------|------|------------|---------------------------------------|-------------|
|                        |                       |      |            | Unterer Wert                          | Oberer Wert |
| Schritt 1 <sup>a</sup> | v1_sex(1)             | ,015 | ,254       | ,084                                  | ,769        |
|                        | v1_ageBL              | ,478 | 1,026      | ,955                                  | 1,103       |
|                        | V1_age <sup>2</sup>   | ,077 | ,999       | ,998                                  | 1,000       |
|                        | v1_ageBL by v1_sex(1) | ,053 | 1,024      | 1,000                                 | 1,049       |
|                        | PC1                   | ,491 | 23,572     | ,003                                  | 191107,252  |
|                        | PC2                   | ,050 | 116,217    | ,992                                  | 13621,106   |
|                        | PC3                   | ,174 | ,013       | ,000                                  | 6,907       |
|                        | PC4                   | ,007 | 172069,732 | 28,274                                | 1047189713  |
|                        | PC5                   | ,015 | 4730,085   | 5,117                                 | 4372272,224 |
|                        | Konstante             | ,314 | 2,200      |                                       |             |

a. In Schritt 1 eingegebene Variablen: v1\_sex, v1\_ageBL, V1\_age<sup>2</sup>, v1\_ageBL \* v1\_sex, PC1, PC2, PC3, PC4, PC5.

## Block 2: Methode = Einschluß

### Omnibus-Tests der Modellkoeffizienten

|           |         | Chi-Quadrat | df | Sig. |
|-----------|---------|-------------|----|------|
| Schritt 1 | Schritt | 8,611       | 1  | ,003 |
|           | Block   | 8,611       | 1  | ,003 |
|           | Modell  | 62,481      | 10 | ,000 |

## Modellzusammenfassung

| Schritt | -2 Log-Likelihood    | Cox & Snell R-Quadrat | Nagelkerkes R-Quadrat |
|---------|----------------------|-----------------------|-----------------------|
| 1       | 989,731 <sup>a</sup> | ,078                  | ,105                  |

a. Schätzung beendet bei Iteration Nummer 6, weil die Parameterschätzer sich um weniger als ,001 änderten.

## Klassifizierungstabelle<sup>a</sup>

|           |                   |                       | Vorhergesagt          |       | Prozentsatz der Richtigen |
|-----------|-------------------|-----------------------|-----------------------|-------|---------------------------|
|           |                   |                       | v1_diagn_group<br>AFF | PSYCH |                           |
| Schritt 1 | Beobachtet        | v1_diagn_group<br>AFF | 125                   | 204   | 38,0                      |
|           |                   | PSYCH                 | 80                    | 362   | 81,9                      |
|           | Gesamtprozentsatz |                       |                       |       | 63,2                      |

a. Der Trennwert lautet ,500

## Variablen in der Gleichung

|                        |                        | Regressionsko<br>effizientB | Standardfehler | Wald  | df |
|------------------------|------------------------|-----------------------------|----------------|-------|----|
| Schritt 1 <sup>a</sup> | v1_sex(1)              | -1,407                      | ,568           | 6,133 | 1  |
|                        | v1_ageBL               | ,028                        | ,037           | ,596  | 1  |
|                        | V1_age <sup>2</sup>    | -,001                       | ,000           | 3,355 | 1  |
|                        | v1_ageBL by v1_sex(1)  | ,025                        | ,012           | 4,085 | 1  |
|                        | PC1                    | 2,959                       | 4,835          | ,375  | 1  |
|                        | PC2                    | 5,914                       | 2,551          | 5,375 | 1  |
|                        | PC3                    | -5,216                      | 3,337          | 2,444 | 1  |
|                        | PC4                    | 13,443                      | 4,522          | 8,839 | 1  |
|                        | PC5                    | 9,069                       | 3,498          | 6,722 | 1  |
|                        | z-Faktorwert(PRS_0.01) | ,228                        | ,078           | 8,468 | 1  |
|                        | Konstante              | ,741                        | ,786           | ,888  | 1  |

### Variablen in der Gleichung

|                        |                        |      |            | 95% Konfidenzintervall für EXP (B) |             |
|------------------------|------------------------|------|------------|------------------------------------|-------------|
|                        |                        | Sig. | Exp(B)     | Unterer Wert                       | Oberer Wert |
| Schritt 1 <sup>a</sup> | v1_sex(1)              | ,013 | ,245       | ,080                               | ,746        |
|                        | v1_ageBL               | ,440 | 1,029      | ,957                               | 1,106       |
|                        | V1_age <sup>2</sup>    | ,067 | ,999       | ,998                               | 1,000       |
|                        | v1_ageBL by v1_sex(1)  | ,043 | 1,025      | 1,001                              | 1,051       |
|                        | PC1                    | ,541 | 19,282     | ,001                               | 251788,209  |
|                        | PC2                    | ,020 | 370,268    | 2,495                              | 54941,749   |
|                        | PC3                    | ,118 | ,005       | ,000                               | 3,757       |
|                        | PC4                    | ,003 | 688786,028 | 97,557                             | 4863081632  |
|                        | PC5                    | ,010 | 8679,065   | 9,142                              | 8239492,106 |
|                        | z-Faktorwert(PRS_0.01) | ,004 | 1,256      | 1,077                              | 1,465       |
|                        | Konstante              | ,346 | 2,098      |                                    |             |

a. In Schritt 1 eingegebene Variablen: z-Faktorwert(PRS\_0.01).

```
LOGISTIC REGRESSION VARIABLES v1_diagn_group
/METHOD=ENTER v1_sex v1_ageBL V1_age2 v1_ageBL*v1_sex PC1 PC2 PC3 PC4 PC5
/METHOD=ENTER ZPRS_0.05
/CONTRAST (v1_sex)=Indicator
/CONTRAST (v1_sex)=Indicator
/PRINT=CI(95)
/CRITERIA=PIN(0.05) POUT(0.10) ITERATE(20) CUT(0.5).
```

## Logistische Regression

### Warnungen

Kontrast für diese kategoriale Variable bereits angegeben. Der letzte Kontrast wird verwendet.

### Zusammenfassung der Fallverarbeitung

| Ungewichtete Fälle <sup>a</sup> |                       | N   | Prozent |
|---------------------------------|-----------------------|-----|---------|
| Ausgewählte Fälle               | Einbezogen in Analyse | 771 | 100,0   |
|                                 | Fehlende Fälle        | 0   | ,0      |
|                                 | Gesamt                | 771 | 100,0   |
| Nicht ausgewählte Fälle         |                       | 0   | ,0      |
| Gesamt                          |                       | 771 | 100,0   |

a. Wenn die Gewichtung wirksam ist, finden Sie die Gesamtzahl der Fälle in der Klassifizierungstabelle.



### Codierung abhängiger Variablen

| Ursprünglicher Wert | Interner Wert |
|---------------------|---------------|
| AFF                 | 0             |
| PSYCH               | 1             |

### Codierungen kategorialer Variablen

|        |   | Häufigkeit | Parametercodierung<br>(1) |
|--------|---|------------|---------------------------|
| v1_sex | F | 330        | 1,000                     |
|        | M | 441        | ,000                      |

## Block 0: Anfangsblock

### Klassifizierungstabelle<sup>a,b</sup>

| Beobachtet |                   |       | Vorhergesagt          |       | Prozentsatz der<br>Richtigen |
|------------|-------------------|-------|-----------------------|-------|------------------------------|
|            |                   |       | v1_diagn_group<br>AFF | PSYCH |                              |
| Schritt 0  | v1_diagn_group    | AFF   | 0                     | 329   | ,0                           |
|            |                   | PSYCH | 0                     | 442   | 100,0                        |
|            | Gesamtprozentsatz |       |                       |       | 57,3                         |

a. Konstante in das Modell einbezogen.

b. Der Trennwert lautet ,500

### Variablen in der Gleichung

|           |           | Regressionsko-<br>effizientB | Standardfehler | Wald   | df | Sig. | Exp(B) |
|-----------|-----------|------------------------------|----------------|--------|----|------|--------|
| Schritt 0 | Konstante | ,295                         | ,073           | 16,442 | 1  | ,000 | 1,343  |

### Variablen nicht in der Gleichung<sup>a</sup>

|           |           |                       | Wert   | df | Sig. |
|-----------|-----------|-----------------------|--------|----|------|
| Schritt 0 | Variablen | v1_sex(1)             | 5,672  | 1  | ,017 |
|           |           | v1_ageBL              | 24,553 | 1  | ,000 |
|           |           | V1_age <sup>2</sup>   | 26,804 | 1  | ,000 |
|           |           | v1_ageBL by v1_sex(1) | 7,161  | 1  | ,007 |
|           |           | PC1                   | 2,760  | 1  | ,097 |
|           |           | PC2                   | 3,051  | 1  | ,081 |
|           |           | PC3                   | ,485   | 1  | ,486 |
|           |           | PC4                   | 3,426  | 1  | ,064 |
|           |           | PC5                   | 2,437  | 1  | ,118 |

a. Chi-Quadrate der Residuen werden wegen Redundanzen nicht berechnet.

## Block 1: Methode = Einschluß

### Omnibus-Tests der Modellkoeffizienten

|           |         | Chi-Quadrat | df | Sig. |
|-----------|---------|-------------|----|------|
| Schritt 1 | Schritt | 53,870      | 9  | ,000 |
|           | Block   | 53,870      | 9  | ,000 |
|           | Modell  | 53,870      | 9  | ,000 |

### Modellzusammenfassung

| Schritt | -2 Log-Likelihood    | Cox & Snell R-Quadrat | Nagelkerkes R-Quadrat |
|---------|----------------------|-----------------------|-----------------------|
| 1       | 998,341 <sup>a</sup> | ,067                  | ,091                  |

a. Schätzung beendet bei Iteration Nummer 6, weil die Parameterschätzer sich um weniger als ,001 änderten.

### Klassifizierungstabelle<sup>a</sup>

|           |                   | Vorhergesagt          |       | Prozentsatz der Richtigen |
|-----------|-------------------|-----------------------|-------|---------------------------|
|           |                   | v1_diagn_group<br>AFF | PSYCH |                           |
| Schritt 1 | Beobachtet        |                       |       |                           |
|           | v1_diagn_group    | AFF                   | PSYCH |                           |
|           |                   |                       |       |                           |
|           | AFF               | 109                   | 220   | 33,1                      |
|           | PSYCH             | 76                    | 366   | 82,8                      |
|           | Gesamtprozentsatz |                       |       | 61,6                      |

a. Der Trennwert lautet ,500

### Variablen in der Gleichung

|                        |                       | Regressionsko-<br>effizientB | Standardfehler | Wald  | df |
|------------------------|-----------------------|------------------------------|----------------|-------|----|
| Schritt 1 <sup>a</sup> | v1_sex(1)             | -1,370                       | ,565           | 5,885 | 1  |
|                        | v1_ageBL              | ,026                         | ,037           | ,504  | 1  |
|                        | V1_age <sup>2</sup>   | -,001                        | ,000           | 3,123 | 1  |
|                        | v1_ageBL by v1_sex(1) | ,024                         | ,012           | 3,748 | 1  |
|                        | PC1                   | 3,160                        | 4,592          | ,474  | 1  |
|                        | PC2                   | 4,755                        | 2,431          | 3,828 | 1  |
|                        | PC3                   | -4,365                       | 3,213          | 1,845 | 1  |
|                        | PC4                   | 12,056                       | 4,446          | 7,353 | 1  |
|                        | PC5                   | 8,462                        | 3,484          | 5,898 | 1  |
|                        | Konstante             | ,789                         | ,783           | 1,014 | 1  |

### Variablen in der Gleichung

|                        |                       | Sig. | Exp(B)     | 95% Konfidenzintervall für EXP<br>(B) |             |
|------------------------|-----------------------|------|------------|---------------------------------------|-------------|
|                        |                       |      |            | Unterer Wert                          | Oberer Wert |
| Schritt 1 <sup>a</sup> | v1_sex(1)             | ,015 | ,254       | ,084                                  | ,769        |
|                        | v1_ageBL              | ,478 | 1,026      | ,955                                  | 1,103       |
|                        | V1_age <sup>2</sup>   | ,077 | ,999       | ,998                                  | 1,000       |
|                        | v1_ageBL by v1_sex(1) | ,053 | 1,024      | 1,000                                 | 1,049       |
|                        | PC1                   | ,491 | 23,572     | ,003                                  | 191107,252  |
|                        | PC2                   | ,050 | 116,217    | ,992                                  | 13621,106   |
|                        | PC3                   | ,174 | ,013       | ,000                                  | 6,907       |
|                        | PC4                   | ,007 | 172069,732 | 28,274                                | 1047189713  |
|                        | PC5                   | ,015 | 4730,085   | 5,117                                 | 4372272,224 |
|                        | Konstante             | ,314 | 2,200      |                                       |             |

a. In Schritt 1 eingegebene Variablen: v1\_sex, v1\_ageBL, V1\_age<sup>2</sup>, v1\_ageBL \* v1\_sex, PC1, PC2, PC3, PC4, PC5.

## Block 2: Methode = Einschluß

### Omnibus-Tests der Modellkoeffizienten

|           |         | Chi-Quadrat | df | Sig. |
|-----------|---------|-------------|----|------|
| Schritt 1 | Schritt | 10,077      | 1  | ,002 |
|           | Block   | 10,077      | 1  | ,002 |
|           | Modell  | 63,947      | 10 | ,000 |

## Modellzusammenfassung

| Schritt | -2 Log-Likelihood    | Cox & Snell R-Quadrat | Nagelkerkes R-Quadrat |
|---------|----------------------|-----------------------|-----------------------|
| 1       | 988,264 <sup>a</sup> | ,080                  | ,107                  |

a. Schätzung beendet bei Iteration Nummer 6, weil die Parameterschätzer sich um weniger als ,001 änderten.

## Klassifizierungstabelle<sup>a</sup>

|           |                   |                       | Vorhergesagt          |       | Prozentsatz der Richtigen |
|-----------|-------------------|-----------------------|-----------------------|-------|---------------------------|
|           |                   |                       | v1_diagn_group<br>AFF | PSYCH |                           |
| Schritt 1 | Beobachtet        | v1_diagn_group<br>AFF | 128                   | 201   | 38,9                      |
|           |                   | PSYCH                 | 88                    | 354   | 80,1                      |
|           | Gesamtprozentsatz |                       |                       |       | 62,5                      |

a. Der Trennwert lautet ,500

## Variablen in der Gleichung

|                        |                        | Regressionsko<br>effizientB | Standardfehler | Wald  | df |
|------------------------|------------------------|-----------------------------|----------------|-------|----|
| Schritt 1 <sup>a</sup> | v1_sex(1)              | -1,372                      | ,568           | 5,829 | 1  |
|                        | v1_ageBL               | ,030                        | ,037           | ,666  | 1  |
|                        | V1_age <sup>2</sup>    | -,001                       | ,000           | 3,439 | 1  |
|                        | v1_ageBL by v1_sex(1)  | ,024                        | ,012           | 3,753 | 1  |
|                        | PC1                    | 2,849                       | 4,892          | ,339  | 1  |
|                        | PC2                    | 6,058                       | 2,591          | 5,464 | 1  |
|                        | PC3                    | -5,317                      | 3,386          | 2,465 | 1  |
|                        | PC4                    | 13,958                      | 4,544          | 9,435 | 1  |
|                        | PC5                    | 9,410                       | 3,497          | 7,240 | 1  |
|                        | z-Faktorwert(PRS_0.05) | ,248                        | ,079           | 9,908 | 1  |
|                        | Konstante              | ,696                        | ,788           | ,781  | 1  |

### Variablen in der Gleichung

|                        |                        |      |             | 95% Konfidenzintervall für EXP (B) |             |
|------------------------|------------------------|------|-------------|------------------------------------|-------------|
|                        |                        | Sig. | Exp(B)      | Unterer Wert                       | Oberer Wert |
| Schritt 1 <sup>a</sup> | v1_sex(1)              | ,016 | ,254        | ,083                               | ,772        |
|                        | v1_ageBL               | ,414 | 1,031       | ,959                               | 1,108       |
|                        | V1_age <sup>2</sup>    | ,064 | ,999        | ,998                               | 1,000       |
|                        | v1_ageBL by v1_sex(1)  | ,053 | 1,024       | 1,000                              | 1,050       |
|                        | PC1                    | ,560 | 17,264      | ,001                               | 251994,933  |
|                        | PC2                    | ,019 | 427,407     | 2,661                              | 68659,837   |
|                        | PC3                    | ,116 | ,005        | ,000                               | 3,744       |
|                        | PC4                    | ,002 | 1153691,169 | 156,335                            | 8513813611  |
|                        | PC5                    | ,007 | 12210,523   | 12,882                             | 11574282,75 |
|                        | z-Faktorwert(PRS_0.05) | ,002 | 1,281       | 1,098                              | 1,495       |
|                        | Konstante              | ,377 | 2,006       |                                    |             |

a. In Schritt 1 eingegebene Variablen: z-Faktorwert(PRS\_0.05).

```
LOGISTIC REGRESSION VARIABLES v1_diagn_group
/METHOD=ENTER v1_sex v1_ageBL V1_age2 v1_ageBL*v1_sex PC1 PC2 PC3 PC4 PC5
/METHOD=ENTER ZPRS_0.1
/CONTRAST (v1_sex)=Indicator
/CONTRAST (v1_sex)=Indicator
/PRINT=CI(95)
/CRITERIA=PIN(0.05) POUT(0.10) ITERATE(20) CUT(0.5).
```

## Logistische Regression

### Warnungen

Kontrast für diese kategoriale Variable bereits angegeben. Der letzte Kontrast wird verwendet.

### Zusammenfassung der Fallverarbeitung

| Ungewichtete Fälle <sup>a</sup> |                       | N   | Prozent |
|---------------------------------|-----------------------|-----|---------|
| Ausgewählte Fälle               | Einbezogen in Analyse | 771 | 100,0   |
|                                 | Fehlende Fälle        | 0   | ,0      |
|                                 | Gesamt                | 771 | 100,0   |
| Nicht ausgewählte Fälle         |                       | 0   | ,0      |
| Gesamt                          |                       | 771 | 100,0   |

a. Wenn die Gewichtung wirksam ist, finden Sie die Gesamtzahl der Fälle in der Klassifizierungstabelle.

### Codierung abhängiger Variablen

| Ursprünglicher Wert | Interner Wert |
|---------------------|---------------|
| AFF                 | 0             |
| PSYCH               | 1             |

### Codierungen kategorialer Variablen

|        |   | Häufigkeit | Parametercodierung<br>(1) |
|--------|---|------------|---------------------------|
| v1_sex | F | 330        | 1,000                     |
|        | M | 441        | ,000                      |

## Block 0: Anfangsblock

### Klassifizierungstabelle<sup>a,b</sup>

| Beobachtet |                   |       | Vorhergesagt          |       | Prozentsatz der<br>Richtigen |
|------------|-------------------|-------|-----------------------|-------|------------------------------|
|            |                   |       | v1_diagn_group<br>AFF | PSYCH |                              |
| Schritt 0  | v1_diagn_group    | AFF   | 0                     | 329   | ,0                           |
|            |                   | PSYCH | 0                     | 442   | 100,0                        |
|            | Gesamtprozentsatz |       |                       |       | 57,3                         |

a. Konstante in das Modell einbezogen.

b. Der Trennwert lautet ,500

### Variablen in der Gleichung

|           |           | Regressionsko-<br>effizientB | Standardfehler | Wald   | df | Sig. | Exp(B) |
|-----------|-----------|------------------------------|----------------|--------|----|------|--------|
| Schritt 0 | Konstante | ,295                         | ,073           | 16,442 | 1  | ,000 | 1,343  |

### Variablen nicht in der Gleichung<sup>a</sup>

|           |           |                       | Wert   | df | Sig. |
|-----------|-----------|-----------------------|--------|----|------|
| Schritt 0 | Variablen | v1_sex(1)             | 5,672  | 1  | ,017 |
|           |           | v1_ageBL              | 24,553 | 1  | ,000 |
|           |           | V1_age <sup>2</sup>   | 26,804 | 1  | ,000 |
|           |           | v1_ageBL by v1_sex(1) | 7,161  | 1  | ,007 |
|           |           | PC1                   | 2,760  | 1  | ,097 |
|           |           | PC2                   | 3,051  | 1  | ,081 |
|           |           | PC3                   | ,485   | 1  | ,486 |
|           |           | PC4                   | 3,426  | 1  | ,064 |
|           |           | PC5                   | 2,437  | 1  | ,118 |

a. Chi-Quadrate der Residuen werden wegen Redundanzen nicht berechnet.

## Block 1: Methode = Einschluß

### Omnibus-Tests der Modellkoeffizienten

|           |         | Chi-Quadrat | df | Sig. |
|-----------|---------|-------------|----|------|
| Schritt 1 | Schritt | 53,870      | 9  | ,000 |
|           | Block   | 53,870      | 9  | ,000 |
|           | Modell  | 53,870      | 9  | ,000 |

### Modellzusammenfassung

| Schritt | -2 Log-Likelihood    | Cox & Snell R-Quadrat | Nagelkerkes R-Quadrat |
|---------|----------------------|-----------------------|-----------------------|
| 1       | 998,341 <sup>a</sup> | ,067                  | ,091                  |

a. Schätzung beendet bei Iteration Nummer 6, weil die Parameterschätzer sich um weniger als ,001 änderten.

### Klassifizierungstabelle<sup>a</sup>

|            |                   |       | Vorhergesagt   |       |                           |
|------------|-------------------|-------|----------------|-------|---------------------------|
|            |                   |       | v1_diagn_group |       | Prozentsatz der Richtigen |
| Beobachtet |                   |       | AFF            | PSYCH |                           |
| Schritt 1  | v1_diagn_group    | AFF   | 109            | 220   | 33,1                      |
|            |                   | PSYCH | 76             | 366   | 82,8                      |
|            | Gesamtprozentsatz |       |                |       | 61,6                      |

a. Der Trennwert lautet ,500

### Variablen in der Gleichung

|                        |                       | Regressionsko<br>effizientB | Standardfehler | Wald  | df |
|------------------------|-----------------------|-----------------------------|----------------|-------|----|
| Schritt 1 <sup>a</sup> | v1_sex(1)             | -1,370                      | ,565           | 5,885 | 1  |
|                        | v1_ageBL              | ,026                        | ,037           | ,504  | 1  |
|                        | V1_age <sup>2</sup>   | -,001                       | ,000           | 3,123 | 1  |
|                        | v1_ageBL by v1_sex(1) | ,024                        | ,012           | 3,748 | 1  |
|                        | PC1                   | 3,160                       | 4,592          | ,474  | 1  |
|                        | PC2                   | 4,755                       | 2,431          | 3,828 | 1  |
|                        | PC3                   | -4,365                      | 3,213          | 1,845 | 1  |
|                        | PC4                   | 12,056                      | 4,446          | 7,353 | 1  |
|                        | PC5                   | 8,462                       | 3,484          | 5,898 | 1  |
|                        | Konstante             | ,789                        | ,783           | 1,014 | 1  |

### Variablen in der Gleichung

|                        |                       | Sig. | Exp(B)     | 95% Konfidenzintervall für EXP<br>(B) |             |
|------------------------|-----------------------|------|------------|---------------------------------------|-------------|
|                        |                       |      |            | Unterer Wert                          | Oberer Wert |
| Schritt 1 <sup>a</sup> | v1_sex(1)             | ,015 | ,254       | ,084                                  | ,769        |
|                        | v1_ageBL              | ,478 | 1,026      | ,955                                  | 1,103       |
|                        | V1_age <sup>2</sup>   | ,077 | ,999       | ,998                                  | 1,000       |
|                        | v1_ageBL by v1_sex(1) | ,053 | 1,024      | 1,000                                 | 1,049       |
|                        | PC1                   | ,491 | 23,572     | ,003                                  | 191107,252  |
|                        | PC2                   | ,050 | 116,217    | ,992                                  | 13621,106   |
|                        | PC3                   | ,174 | ,013       | ,000                                  | 6,907       |
|                        | PC4                   | ,007 | 172069,732 | 28,274                                | 1047189713  |
|                        | PC5                   | ,015 | 4730,085   | 5,117                                 | 4372272,224 |
|                        | Konstante             | ,314 | 2,200      |                                       |             |

a. In Schritt 1 eingegebene Variablen: v1\_sex, v1\_ageBL, V1\_age<sup>2</sup>, v1\_ageBL \* v1\_sex, PC1, PC2, PC3, PC4, PC5.

## Block 2: Methode = Einschluß

### Omnibus-Tests der Modellkoeffizienten

|           |         | Chi-Quadrat | df | Sig. |
|-----------|---------|-------------|----|------|
| Schritt 1 | Schritt | 7,955       | 1  | ,005 |
|           | Block   | 7,955       | 1  | ,005 |
|           | Modell  | 61,826      | 10 | ,000 |



## Modellzusammenfassung

| Schritt | -2 Log-Likelihood    | Cox & Snell R-Quadrat | Nagelkerkes R-Quadrat |
|---------|----------------------|-----------------------|-----------------------|
| 1       | 990,386 <sup>a</sup> | ,077                  | ,103                  |

a. Schätzung beendet bei Iteration Nummer 6, weil die Parameterschätzer sich um weniger als ,001 änderten.

## Klassifizierungstabelle<sup>a</sup>

| Beobachtet |                   |       | Vorhergesagt          |       | Prozentsatz der Richtigen |
|------------|-------------------|-------|-----------------------|-------|---------------------------|
|            |                   |       | v1_diagn_group<br>AFF | PSYCH |                           |
| Schritt 1  | v1_diagn_group    | AFF   | 119                   | 210   | 36,2                      |
|            |                   | PSYCH | 84                    | 358   | 81,0                      |
|            | Gesamtprozentsatz |       |                       |       | 61,9                      |

a. Der Trennwert lautet ,500

## Variablen in der Gleichung

|                        |                       | Regressionsko-<br>effizientB | Standardfehler | Wald  | df |
|------------------------|-----------------------|------------------------------|----------------|-------|----|
| Schritt 1 <sup>a</sup> | v1_sex(1)             | -1,375                       | ,568           | 5,864 | 1  |
|                        | v1_ageBL              | ,031                         | ,037           | ,708  | 1  |
|                        | V1_age <sup>2</sup>   | -,001                        | ,000           | 3,547 | 1  |
|                        | v1_ageBL by v1_sex(1) | ,024                         | ,012           | 3,751 | 1  |
|                        | PC1                   | 3,040                        | 4,836          | ,395  | 1  |
|                        | PC2                   | 5,898                        | 2,586          | 5,199 | 1  |
|                        | PC3                   | -5,434                       | 3,391          | 2,569 | 1  |
|                        | PC4                   | 13,919                       | 4,541          | 9,396 | 1  |
|                        | PC5                   | 9,556                        | 3,503          | 7,441 | 1  |
|                        | z-Faktorwert(PRS_0.1) | ,220                         | ,079           | 7,851 | 1  |
|                        | Konstante             | ,681                         | ,788           | ,748  | 1  |

### Variablen in der Gleichung

|                        |                       |      |             | 95% Konfidenzintervall für EXP (B) |             |
|------------------------|-----------------------|------|-------------|------------------------------------|-------------|
|                        |                       | Sig. | Exp(B)      | Unterer Wert                       | Oberer Wert |
| Schritt 1 <sup>a</sup> | v1_sex(1)             | ,015 | ,253        | ,083                               | ,769        |
|                        | v1_ageBL              | ,400 | 1,032       | ,959                               | 1,109       |
|                        | V1_age <sup>2</sup>   | ,060 | ,999        | ,998                               | 1,000       |
|                        | v1_ageBL by v1_sex(1) | ,053 | 1,024       | 1,000                              | 1,050       |
|                        | PC1                   | ,530 | 20,895      | ,002                               | 273136,717  |
|                        | PC2                   | ,023 | 364,157     | 2,289                              | 57929,065   |
|                        | PC3                   | ,109 | ,004        | ,000                               | 3,359       |
|                        | PC4                   | ,002 | 1109542,698 | 151,284                            | 8137566976  |
|                        | PC5                   | ,006 | 14132,483   | 14,729                             | 13560583,39 |
|                        | z-Faktorwert(PRS_0.1) | ,005 | 1,246       | 1,068                              | 1,454       |
|                        | Konstante             | ,387 | 1,976       |                                    |             |

a. In Schritt 1 eingegebene Variablen: z-Faktorwert(PRS\_0.1).

```
LOGISTIC REGRESSION VARIABLES v1_diagn_group
/METHOD=ENTER v1_sex v1_ageBL V1_age2 v1_ageBL*v1_sex PC1 PC2 PC3 PC4 PC5
/METHOD=ENTER ZPRS_0.2
/CONTRAST (v1_sex)=Indicator
/CONTRAST (v1_sex)=Indicator
/PRINT=CI(95)
/CRITERIA=PIN(0.05) POUT(0.10) ITERATE(20) CUT(0.5).
```

## Logistische Regression

### Warnungen

Kontrast für diese kategoriale Variable bereits angegeben. Der letzte Kontrast wird verwendet.

### Zusammenfassung der Fallverarbeitung

| Ungewichtete Fälle <sup>a</sup> |                       | N   | Prozent |
|---------------------------------|-----------------------|-----|---------|
| Ausgewählte Fälle               | Einbezogen in Analyse | 771 | 100,0   |
|                                 | Fehlende Fälle        | 0   | ,0      |
|                                 | Gesamt                | 771 | 100,0   |
| Nicht ausgewählte Fälle         |                       | 0   | ,0      |
| Gesamt                          |                       | 771 | 100,0   |

a. Wenn die Gewichtung wirksam ist, finden Sie die Gesamtzahl der Fälle in der Klassifizierungstabelle.

### Codierung abhängiger Variablen

| Ursprünglicher Wert | Interner Wert |
|---------------------|---------------|
| AFF                 | 0             |
| PSYCH               | 1             |

### Codierungen kategorialer Variablen

|        |   | Häufigkeit | Parametercodierung<br>(1) |
|--------|---|------------|---------------------------|
| v1_sex | F | 330        | 1,000                     |
|        | M | 441        | ,000                      |

## Block 0: Anfangsblock

### Klassifizierungstabelle<sup>a,b</sup>

| Beobachtet |                   |       | Vorhergesagt          |       | Prozentsatz der<br>Richtigen |
|------------|-------------------|-------|-----------------------|-------|------------------------------|
|            |                   |       | v1_diagn_group<br>AFF | PSYCH |                              |
| Schritt 0  | v1_diagn_group    | AFF   | 0                     | 329   | ,0                           |
|            |                   | PSYCH | 0                     | 442   | 100,0                        |
|            | Gesamtprozentsatz |       |                       |       | 57,3                         |

a. Konstante in das Modell einbezogen.

b. Der Trennwert lautet ,500

### Variablen in der Gleichung

|           |           | Regressionsko<br>effizientB | Standardfehler | Wald   | df | Sig. | Exp(B) |
|-----------|-----------|-----------------------------|----------------|--------|----|------|--------|
| Schritt 0 | Konstante | ,295                        | ,073           | 16,442 | 1  | ,000 | 1,343  |

### Variablen nicht in der Gleichung<sup>a</sup>

|           |           |                       | Wert   | df | Sig. |
|-----------|-----------|-----------------------|--------|----|------|
| Schritt 0 | Variablen | v1_sex(1)             | 5,672  | 1  | ,017 |
|           |           | v1_ageBL              | 24,553 | 1  | ,000 |
|           |           | V1_age <sup>2</sup>   | 26,804 | 1  | ,000 |
|           |           | v1_ageBL by v1_sex(1) | 7,161  | 1  | ,007 |
|           |           | PC1                   | 2,760  | 1  | ,097 |
|           |           | PC2                   | 3,051  | 1  | ,081 |
|           |           | PC3                   | ,485   | 1  | ,486 |
|           |           | PC4                   | 3,426  | 1  | ,064 |
|           |           | PC5                   | 2,437  | 1  | ,118 |

a. Chi-Quadrate der Residuen werden wegen Redundanzen nicht berechnet.

## Block 1: Methode = Einschluß

### Omnibus-Tests der Modellkoeffizienten

|           |         | Chi-Quadrat | df | Sig. |
|-----------|---------|-------------|----|------|
| Schritt 1 | Schritt | 53,870      | 9  | ,000 |
|           | Block   | 53,870      | 9  | ,000 |
|           | Modell  | 53,870      | 9  | ,000 |

### Modellzusammenfassung

| Schritt | -2 Log-Likelihood    | Cox & Snell R-Quadrat | Nagelkerkes R-Quadrat |
|---------|----------------------|-----------------------|-----------------------|
| 1       | 998,341 <sup>a</sup> | ,067                  | ,091                  |

a. Schätzung beendet bei Iteration Nummer 6, weil die Parameterschätzer sich um weniger als ,001 änderten.

### Klassifizierungstabelle<sup>a</sup>

|            |                   |       | Vorhergesagt   |       |                           |
|------------|-------------------|-------|----------------|-------|---------------------------|
|            |                   |       | v1_diagn_group |       | Prozentsatz der Richtigen |
| Beobachtet |                   |       | AFF            | PSYCH |                           |
| Schritt 1  | v1_diagn_group    | AFF   | 109            | 220   | 33,1                      |
|            |                   | PSYCH | 76             | 366   | 82,8                      |
|            | Gesamtprozentsatz |       |                |       | 61,6                      |

a. Der Trennwert lautet ,500

### Variablen in der Gleichung

|                        |                       | Regressionsko-<br>effizientB | Standardfehler | Wald  | df |
|------------------------|-----------------------|------------------------------|----------------|-------|----|
| Schritt 1 <sup>a</sup> | v1_sex(1)             | -1,370                       | ,565           | 5,885 | 1  |
|                        | v1_ageBL              | ,026                         | ,037           | ,504  | 1  |
|                        | V1_age <sup>2</sup>   | -,001                        | ,000           | 3,123 | 1  |
|                        | v1_ageBL by v1_sex(1) | ,024                         | ,012           | 3,748 | 1  |
|                        | PC1                   | 3,160                        | 4,592          | ,474  | 1  |
|                        | PC2                   | 4,755                        | 2,431          | 3,828 | 1  |
|                        | PC3                   | -4,365                       | 3,213          | 1,845 | 1  |
|                        | PC4                   | 12,056                       | 4,446          | 7,353 | 1  |
|                        | PC5                   | 8,462                        | 3,484          | 5,898 | 1  |
|                        | Konstante             | ,789                         | ,783           | 1,014 | 1  |

### Variablen in der Gleichung

|                        |                       | Sig. | Exp(B)     | 95% Konfidenzintervall für EXP<br>(B) |             |
|------------------------|-----------------------|------|------------|---------------------------------------|-------------|
|                        |                       |      |            | Unterer Wert                          | Oberer Wert |
| Schritt 1 <sup>a</sup> | v1_sex(1)             | ,015 | ,254       | ,084                                  | ,769        |
|                        | v1_ageBL              | ,478 | 1,026      | ,955                                  | 1,103       |
|                        | V1_age <sup>2</sup>   | ,077 | ,999       | ,998                                  | 1,000       |
|                        | v1_ageBL by v1_sex(1) | ,053 | 1,024      | 1,000                                 | 1,049       |
|                        | PC1                   | ,491 | 23,572     | ,003                                  | 191107,252  |
|                        | PC2                   | ,050 | 116,217    | ,992                                  | 13621,106   |
|                        | PC3                   | ,174 | ,013       | ,000                                  | 6,907       |
|                        | PC4                   | ,007 | 172069,732 | 28,274                                | 1047189713  |
|                        | PC5                   | ,015 | 4730,085   | 5,117                                 | 4372272,224 |
|                        | Konstante             | ,314 | 2,200      |                                       |             |

a. In Schritt 1 eingegebene Variablen: v1\_sex, v1\_ageBL, V1\_age<sup>2</sup>, v1\_ageBL \* v1\_sex, PC1, PC2, PC3, PC4, PC5.

## Block 2: Methode = Einschluß

### Omnibus-Tests der Modellkoeffizienten

|           |         | Chi-Quadrat | df | Sig. |
|-----------|---------|-------------|----|------|
| Schritt 1 | Schritt | 7,348       | 1  | ,007 |
|           | Block   | 7,348       | 1  | ,007 |
|           | Modell  | 61,218      | 10 | ,000 |

## Modellzusammenfassung

| Schritt | -2 Log-Likelihood    | Cox & Snell R-Quadrat | Nagelkerkes R-Quadrat |
|---------|----------------------|-----------------------|-----------------------|
| 1       | 990,993 <sup>a</sup> | ,076                  | ,103                  |

a. Schätzung beendet bei Iteration Nummer 6, weil die Parameterschätzer sich um weniger als ,001 änderten.

## Klassifizierungstabelle<sup>a</sup>

| Beobachtet |                   |       | Vorhergesagt          |       | Prozentsatz der Richtigen |
|------------|-------------------|-------|-----------------------|-------|---------------------------|
|            |                   |       | v1_diagn_group<br>AFF | PSYCH |                           |
| Schritt 1  | v1_diagn_group    | AFF   | 118                   | 211   | 35,9                      |
|            |                   | PSYCH | 84                    | 358   | 81,0                      |
|            | Gesamtprozentsatz |       |                       |       | 61,7                      |

a. Der Trennwert lautet ,500

## Variablen in der Gleichung

|                        |                       | Regressionsko-<br>effizientB | Standardfehler | Wald  | df |
|------------------------|-----------------------|------------------------------|----------------|-------|----|
| Schritt 1 <sup>a</sup> | v1_sex(1)             | -1,373                       | ,568           | 5,846 | 1  |
|                        | v1_ageBL              | ,030                         | ,037           | ,672  | 1  |
|                        | V1_age <sup>2</sup>   | -,001                        | ,000           | 3,468 | 1  |
|                        | v1_ageBL by v1_sex(1) | ,024                         | ,012           | 3,714 | 1  |
|                        | PC1                   | 3,110                        | 4,813          | ,417  | 1  |
|                        | PC2                   | 5,848                        | 2,607          | 5,032 | 1  |
|                        | PC3                   | -5,539                       | 3,422          | 2,619 | 1  |
|                        | PC4                   | 14,079                       | 4,552          | 9,566 | 1  |
|                        | PC5                   | 9,668                        | 3,516          | 7,563 | 1  |
|                        | z-Faktorwert(PRS_0.2) | ,212                         | ,079           | 7,258 | 1  |
|                        | Konstante             | ,699                         | ,788           | ,787  | 1  |

### Variablen in der Gleichung

|                        |                       |      |             | 95% Konfidenzintervall für EXP (B) |             |
|------------------------|-----------------------|------|-------------|------------------------------------|-------------|
|                        |                       | Sig. | Exp(B)      | Unterer Wert                       | Oberer Wert |
| Schritt 1 <sup>a</sup> | v1_sex(1)             | ,016 | ,253        | ,083                               | ,771        |
|                        | v1_ageBL              | ,412 | 1,031       | ,959                               | 1,108       |
|                        | V1_age <sup>2</sup>   | ,063 | ,999        | ,998                               | 1,000       |
|                        | v1_ageBL by v1_sex(1) | ,054 | 1,024       | 1,000                              | 1,050       |
|                        | PC1                   | ,518 | 22,412      | ,002                               | 279930,035  |
|                        | PC2                   | ,025 | 346,475     | 2,092                              | 57373,885   |
|                        | PC3                   | ,106 | ,004        | ,000                               | 3,217       |
|                        | PC4                   | ,002 | 1301039,022 | 173,659                            | 9747281885  |
|                        | PC5                   | ,006 | 15805,326   | 16,082                             | 15533460,91 |
|                        | z-Faktorwert(PRS_0.2) | ,007 | 1,236       | 1,059                              | 1,442       |
|                        | Konstante             | ,375 | 2,011       |                                    |             |

a. In Schritt 1 eingegebene Variablen: z-Faktorwert(PRS\_0.2).

```
LOGISTIC REGRESSION VARIABLES v1_diagn_group
/METHOD=ENTER v1_sex v1_ageBL V1_age2 v1_ageBL*v1_sex PC1 PC2 PC3 PC4 PC5
/METHOD=ENTER ZPRS_0.3
/CONTRAST (v1_sex)=Indicator
/CONTRAST (v1_sex)=Indicator
/PRINT=CI(95)
/CRITERIA=PIN(0.05) POUT(0.10) ITERATE(20) CUT(0.5).
```

## Logistische Regression

### Warnungen

Kontrast für diese kategoriale Variable bereits angegeben. Der letzte Kontrast wird verwendet.

### Zusammenfassung der Fallverarbeitung

| Ungewichtete Fälle <sup>a</sup> |                       | N   | Prozent |
|---------------------------------|-----------------------|-----|---------|
| Ausgewählte Fälle               | Einbezogen in Analyse | 771 | 100,0   |
|                                 | Fehlende Fälle        | 0   | ,0      |
|                                 | Gesamt                | 771 | 100,0   |
| Nicht ausgewählte Fälle         |                       | 0   | ,0      |
| Gesamt                          |                       | 771 | 100,0   |

a. Wenn die Gewichtung wirksam ist, finden Sie die Gesamtzahl der Fälle in der Klassifizierungstabelle.

### Codierung abhängiger Variablen

| Ursprünglicher Wert | Interner Wert |
|---------------------|---------------|
| AFF                 | 0             |
| PSYCH               | 1             |

### Codierungen kategorialer Variablen

|        |   | Häufigkeit | Parametercodierung<br>(1) |
|--------|---|------------|---------------------------|
| v1_sex | F | 330        | 1,000                     |
|        | M | 441        | ,000                      |

## Block 0: Anfangsblock

### Klassifizierungstabelle<sup>a,b</sup>

| Beobachtet |                   |       | Vorhergesagt          |       | Prozentsatz der<br>Richtigen |
|------------|-------------------|-------|-----------------------|-------|------------------------------|
|            |                   |       | v1_diagn_group<br>AFF | PSYCH |                              |
| Schritt 0  | v1_diagn_group    | AFF   | 0                     | 329   | ,0                           |
|            |                   | PSYCH | 0                     | 442   | 100,0                        |
|            | Gesamtprozentsatz |       |                       |       | 57,3                         |

a. Konstante in das Modell einbezogen.

b. Der Trennwert lautet ,500

### Variablen in der Gleichung

|           |           | Regressionsko-<br>effizientB | Standardfehler | Wald   | df | Sig. | Exp(B) |
|-----------|-----------|------------------------------|----------------|--------|----|------|--------|
| Schritt 0 | Konstante | ,295                         | ,073           | 16,442 | 1  | ,000 | 1,343  |



### Variablen nicht in der Gleichung<sup>a</sup>

|           |           |                       | Wert   | df | Sig. |
|-----------|-----------|-----------------------|--------|----|------|
| Schritt 0 | Variablen | v1_sex(1)             | 5,672  | 1  | ,017 |
|           |           | v1_ageBL              | 24,553 | 1  | ,000 |
|           |           | V1_age <sup>2</sup>   | 26,804 | 1  | ,000 |
|           |           | v1_ageBL by v1_sex(1) | 7,161  | 1  | ,007 |
|           |           | PC1                   | 2,760  | 1  | ,097 |
|           |           | PC2                   | 3,051  | 1  | ,081 |
|           |           | PC3                   | ,485   | 1  | ,486 |
|           |           | PC4                   | 3,426  | 1  | ,064 |
|           |           | PC5                   | 2,437  | 1  | ,118 |

a. Chi-Quadrate der Residuen werden wegen Redundanzen nicht berechnet.

## Block 1: Methode = Einschluß

### Omnibus-Tests der Modellkoeffizienten

|           |         | Chi-Quadrat | df | Sig. |
|-----------|---------|-------------|----|------|
| Schritt 1 | Schritt | 53,870      | 9  | ,000 |
|           | Block   | 53,870      | 9  | ,000 |
|           | Modell  | 53,870      | 9  | ,000 |

### Modellzusammenfassung

| Schritt | -2 Log-Likelihood    | Cox & Snell R-Quadrat | Nagelkerkes R-Quadrat |
|---------|----------------------|-----------------------|-----------------------|
| 1       | 998,341 <sup>a</sup> | ,067                  | ,091                  |

a. Schätzung beendet bei Iteration Nummer 6, weil die Parameterschätzer sich um weniger als ,001 änderten.

### Klassifizierungstabelle<sup>a</sup>

|           |                   | Vorhergesagt          |       | Prozentsatz der Richtigen |
|-----------|-------------------|-----------------------|-------|---------------------------|
|           |                   | v1_diagn_group<br>AFF | PSYCH |                           |
| Schritt 1 | Beobachtet        |                       |       |                           |
|           | v1_diagn_group    | AFF                   | PSYCH |                           |
|           |                   |                       |       |                           |
|           | AFF               | 109                   | 220   | 33,1                      |
|           | PSYCH             | 76                    | 366   | 82,8                      |
|           | Gesamtprozentsatz |                       |       | 61,6                      |

a. Der Trennwert lautet ,500

### Variablen in der Gleichung

|                        |                       | Regressionsko-<br>effizientB | Standardfehler | Wald  | df |
|------------------------|-----------------------|------------------------------|----------------|-------|----|
| Schritt 1 <sup>a</sup> | v1_sex(1)             | -1,370                       | ,565           | 5,885 | 1  |
|                        | v1_ageBL              | ,026                         | ,037           | ,504  | 1  |
|                        | V1_age <sup>2</sup>   | -,001                        | ,000           | 3,123 | 1  |
|                        | v1_ageBL by v1_sex(1) | ,024                         | ,012           | 3,748 | 1  |
|                        | PC1                   | 3,160                        | 4,592          | ,474  | 1  |
|                        | PC2                   | 4,755                        | 2,431          | 3,828 | 1  |
|                        | PC3                   | -4,365                       | 3,213          | 1,845 | 1  |
|                        | PC4                   | 12,056                       | 4,446          | 7,353 | 1  |
|                        | PC5                   | 8,462                        | 3,484          | 5,898 | 1  |
|                        | Konstante             | ,789                         | ,783           | 1,014 | 1  |

### Variablen in der Gleichung

|                        |                       | Sig. | Exp(B)     | 95% Konfidenzintervall für EXP<br>(B) |             |
|------------------------|-----------------------|------|------------|---------------------------------------|-------------|
|                        |                       |      |            | Unterer Wert                          | Oberer Wert |
| Schritt 1 <sup>a</sup> | v1_sex(1)             | ,015 | ,254       | ,084                                  | ,769        |
|                        | v1_ageBL              | ,478 | 1,026      | ,955                                  | 1,103       |
|                        | V1_age <sup>2</sup>   | ,077 | ,999       | ,998                                  | 1,000       |
|                        | v1_ageBL by v1_sex(1) | ,053 | 1,024      | 1,000                                 | 1,049       |
|                        | PC1                   | ,491 | 23,572     | ,003                                  | 191107,252  |
|                        | PC2                   | ,050 | 116,217    | ,992                                  | 13621,106   |
|                        | PC3                   | ,174 | ,013       | ,000                                  | 6,907       |
|                        | PC4                   | ,007 | 172069,732 | 28,274                                | 1047189713  |
|                        | PC5                   | ,015 | 4730,085   | 5,117                                 | 4372272,224 |
|                        | Konstante             | ,314 | 2,200      |                                       |             |

a. In Schritt 1 eingegebene Variablen: v1\_sex, v1\_ageBL, V1\_age<sup>2</sup>, v1\_ageBL \* v1\_sex, PC1, PC2, PC3, PC4, PC5.

## Block 2: Methode = Einschluß

### Omnibus-Tests der Modellkoeffizienten

|           |         | Chi-Quadrat | df | Sig. |
|-----------|---------|-------------|----|------|
| Schritt 1 | Schritt | 6,800       | 1  | ,009 |
|           | Block   | 6,800       | 1  | ,009 |
|           | Modell  | 60,670      | 10 | ,000 |

## Modellzusammenfassung

| Schritt | -2 Log-Likelihood    | Cox & Snell R-Quadrat | Nagelkerkes R-Quadrat |
|---------|----------------------|-----------------------|-----------------------|
| 1       | 991,541 <sup>a</sup> | ,076                  | ,102                  |

a. Schätzung beendet bei Iteration Nummer 6, weil die Parameterschätzer sich um weniger als ,001 änderten.

## Klassifizierungstabelle<sup>a</sup>

| Beobachtet |                   |       | Vorhergesagt          |       | Prozentsatz der Richtigen |
|------------|-------------------|-------|-----------------------|-------|---------------------------|
|            |                   |       | v1_diagn_group<br>AFF | PSYCH |                           |
| Schritt 1  | v1_diagn_group    | AFF   | 113                   | 216   | 34,3                      |
|            |                   | PSYCH | 84                    | 358   | 81,0                      |
|            | Gesamtprozentsatz |       |                       |       | 61,1                      |

a. Der Trennwert lautet ,500

## Variablen in der Gleichung

|                        |                       | Regressionsko<br>effizientB | Standardfehler | Wald  | df |
|------------------------|-----------------------|-----------------------------|----------------|-------|----|
| Schritt 1 <sup>a</sup> | v1_sex(1)             | -1,371                      | ,568           | 5,833 | 1  |
|                        | v1_ageBL              | ,030                        | ,037           | ,654  | 1  |
|                        | V1_age <sup>2</sup>   | -,001                       | ,000           | 3,409 | 1  |
|                        | v1_ageBL by v1_sex(1) | ,024                        | ,012           | 3,675 | 1  |
|                        | PC1                   | 3,083                       | 4,776          | ,417  | 1  |
|                        | PC2                   | 5,791                       | 2,601          | 4,956 | 1  |
|                        | PC3                   | -5,564                      | 3,419          | 2,649 | 1  |
|                        | PC4                   | 14,162                      | 4,564          | 9,627 | 1  |
|                        | PC5                   | 9,689                       | 3,523          | 7,562 | 1  |
|                        | z-Faktorwert(PRS_0.3) | ,204                        | ,079           | 6,717 | 1  |
|                        | Konstante             | ,704                        | ,787           | ,800  | 1  |

### Variablen in der Gleichung

|                        |                       |      |             | 95% Konfidenzintervall für EXP (B) |             |
|------------------------|-----------------------|------|-------------|------------------------------------|-------------|
|                        |                       | Sig. | Exp(B)      | Unterer Wert                       | Oberer Wert |
| Schritt 1 <sup>a</sup> | v1_sex(1)             | ,016 | ,254        | ,083                               | ,772        |
|                        | v1_ageBL              | ,419 | 1,030       | ,958                               | 1,108       |
|                        | V1_age <sup>2</sup>   | ,065 | ,999        | ,998                               | 1,000       |
|                        | v1_ageBL by v1_sex(1) | ,055 | 1,024       | ,999                               | 1,049       |
|                        | PC1                   | ,519 | 21,823      | ,002                               | 253783,338  |
|                        | PC2                   | ,026 | 327,184     | 1,998                              | 53571,268   |
|                        | PC3                   | ,104 | ,004        | ,000                               | 3,117       |
|                        | PC4                   | ,002 | 1413449,617 | 184,169                            | 1,085E+10   |
|                        | PC5                   | ,006 | 16140,169   | 16,170                             | 16110461,00 |
|                        | z-Faktorwert(PRS_0.3) | ,010 | 1,227       | 1,051                              | 1,432       |
| Konstante              |                       | ,371 | 2,022       |                                    |             |

a. In Schritt 1 eingegebene Variablen: z-Faktorwert(PRS\_0.3).

```
LOGISTIC REGRESSION VARIABLES v1_diagn_group
/METHOD=ENTER v1_sex v1_ageBL V1_age2 v1_ageBL*v1_sex PC1 PC2 PC3 PC4 PC5
/METHOD=ENTER ZPRS_0.4
/CONTRAST (v1_sex)=Indicator
/CONTRAST (v1_sex)=Indicator
/PRINT=CI(95)
/CRITERIA=PIN(0.05) POUT(0.10) ITERATE(20) CUT(0.5).
```

## Logistische Regression

### Warnungen

Kontrast für diese kategoriale Variable bereits angegeben. Der letzte Kontrast wird verwendet.

### Zusammenfassung der Fallverarbeitung

| Ungewichtete Fälle <sup>a</sup> |                       | N   | Prozent |
|---------------------------------|-----------------------|-----|---------|
| Ausgewählte Fälle               | Einbezogen in Analyse | 771 | 100,0   |
|                                 | Fehlende Fälle        | 0   | ,0      |
|                                 | Gesamt                | 771 | 100,0   |
| Nicht ausgewählte Fälle         |                       | 0   | ,0      |
| Gesamt                          |                       | 771 | 100,0   |

a. Wenn die Gewichtung wirksam ist, finden Sie die Gesamtzahl der Fälle in der Klassifizierungstabelle.

### Codierung abhängiger Variablen

| Ursprünglicher Wert | Interner Wert |
|---------------------|---------------|
| AFF                 | 0             |
| PSYCH               | 1             |

### Codierungen kategorialer Variablen

|        |   | Häufigkeit | Parametercodierung<br>(1) |
|--------|---|------------|---------------------------|
| v1_sex | F | 330        | 1,000                     |
|        | M | 441        | ,000                      |

## Block 0: Anfangsblock

### Klassifizierungstabelle<sup>a,b</sup>

| Beobachtet |                   |       | Vorhergesagt          |       | Prozentsatz der<br>Richtigen |
|------------|-------------------|-------|-----------------------|-------|------------------------------|
|            |                   |       | v1_diagn_group<br>AFF | PSYCH |                              |
| Schritt 0  | v1_diagn_group    | AFF   | 0                     | 329   | ,0                           |
|            |                   | PSYCH | 0                     | 442   | 100,0                        |
|            | Gesamtprozentsatz |       |                       |       | 57,3                         |

a. Konstante in das Modell einbezogen.

b. Der Trennwert lautet ,500

### Variablen in der Gleichung

|           |           | Regressionsko-<br>effizientB | Standardfehler | Wald   | df | Sig. | Exp(B) |
|-----------|-----------|------------------------------|----------------|--------|----|------|--------|
| Schritt 0 | Konstante | ,295                         | ,073           | 16,442 | 1  | ,000 | 1,343  |

### Variablen nicht in der Gleichung<sup>a</sup>

|           |           |                       | Wert   | df | Sig. |
|-----------|-----------|-----------------------|--------|----|------|
| Schritt 0 | Variablen | v1_sex(1)             | 5,672  | 1  | ,017 |
|           |           | v1_ageBL              | 24,553 | 1  | ,000 |
|           |           | V1_age <sup>2</sup>   | 26,804 | 1  | ,000 |
|           |           | v1_ageBL by v1_sex(1) | 7,161  | 1  | ,007 |
|           |           | PC1                   | 2,760  | 1  | ,097 |
|           |           | PC2                   | 3,051  | 1  | ,081 |
|           |           | PC3                   | ,485   | 1  | ,486 |
|           |           | PC4                   | 3,426  | 1  | ,064 |
|           |           | PC5                   | 2,437  | 1  | ,118 |

a. Chi-Quadrate der Residuen werden wegen Redundanzen nicht berechnet.

## Block 1: Methode = Einschluß

### Omnibus-Tests der Modellkoeffizienten

|           |         | Chi-Quadrat | df | Sig. |
|-----------|---------|-------------|----|------|
| Schritt 1 | Schritt | 53,870      | 9  | ,000 |
|           | Block   | 53,870      | 9  | ,000 |
|           | Modell  | 53,870      | 9  | ,000 |

### Modellzusammenfassung

| Schritt | -2 Log-Likelihood    | Cox & Snell R-Quadrat | Nagelkerkes R-Quadrat |
|---------|----------------------|-----------------------|-----------------------|
| 1       | 998,341 <sup>a</sup> | ,067                  | ,091                  |

a. Schätzung beendet bei Iteration Nummer 6, weil die Parameterschätzer sich um weniger als ,001 änderten.

### Klassifizierungstabelle<sup>a</sup>

|           |                   | Vorhergesagt          |       | Prozentsatz der Richtigen |
|-----------|-------------------|-----------------------|-------|---------------------------|
|           |                   | v1_diagn_group<br>AFF | PSYCH |                           |
| Schritt 1 | Beobachtet        |                       |       |                           |
|           | v1_diagn_group    | AFF                   | PSYCH |                           |
|           |                   |                       |       |                           |
|           | AFF               | 109                   | 220   | 33,1                      |
|           | PSYCH             | 76                    | 366   | 82,8                      |
|           | Gesamtprozentsatz |                       |       | 61,6                      |

a. Der Trennwert lautet ,500

### Variablen in der Gleichung

|                        |                       | Regressionsko<br>effizientB | Standardfehler | Wald  | df |
|------------------------|-----------------------|-----------------------------|----------------|-------|----|
| Schritt 1 <sup>a</sup> | v1_sex(1)             | -1,370                      | ,565           | 5,885 | 1  |
|                        | v1_ageBL              | ,026                        | ,037           | ,504  | 1  |
|                        | V1_age <sup>2</sup>   | -,001                       | ,000           | 3,123 | 1  |
|                        | v1_ageBL by v1_sex(1) | ,024                        | ,012           | 3,748 | 1  |
|                        | PC1                   | 3,160                       | 4,592          | ,474  | 1  |
|                        | PC2                   | 4,755                       | 2,431          | 3,828 | 1  |
|                        | PC3                   | -4,365                      | 3,213          | 1,845 | 1  |
|                        | PC4                   | 12,056                      | 4,446          | 7,353 | 1  |
|                        | PC5                   | 8,462                       | 3,484          | 5,898 | 1  |
|                        | Konstante             | ,789                        | ,783           | 1,014 | 1  |

### Variablen in der Gleichung

|                        |                       | Sig. | Exp(B)     | 95% Konfidenzintervall für EXP<br>(B) |             |
|------------------------|-----------------------|------|------------|---------------------------------------|-------------|
|                        |                       |      |            | Unterer Wert                          | Oberer Wert |
| Schritt 1 <sup>a</sup> | v1_sex(1)             | ,015 | ,254       | ,084                                  | ,769        |
|                        | v1_ageBL              | ,478 | 1,026      | ,955                                  | 1,103       |
|                        | V1_age <sup>2</sup>   | ,077 | ,999       | ,998                                  | 1,000       |
|                        | v1_ageBL by v1_sex(1) | ,053 | 1,024      | 1,000                                 | 1,049       |
|                        | PC1                   | ,491 | 23,572     | ,003                                  | 191107,252  |
|                        | PC2                   | ,050 | 116,217    | ,992                                  | 13621,106   |
|                        | PC3                   | ,174 | ,013       | ,000                                  | 6,907       |
|                        | PC4                   | ,007 | 172069,732 | 28,274                                | 1047189713  |
|                        | PC5                   | ,015 | 4730,085   | 5,117                                 | 4372272,224 |
|                        | Konstante             | ,314 | 2,200      |                                       |             |

a. In Schritt 1 eingegebene Variablen: v1\_sex, v1\_ageBL, V1\_age<sup>2</sup>, v1\_ageBL \* v1\_sex, PC1, PC2, PC3, PC4, PC5.

## Block 2: Methode = Einschluß

### Omnibus-Tests der Modellkoeffizienten

|           |         | Chi-Quadrat | df | Sig. |
|-----------|---------|-------------|----|------|
| Schritt 1 | Schritt | 7,317       | 1  | ,007 |
|           | Block   | 7,317       | 1  | ,007 |
|           | Modell  | 61,187      | 10 | ,000 |

## Modellzusammenfassung

| Schritt | -2 Log-Likelihood    | Cox & Snell R-Quadrat | Nagelkerkes R-Quadrat |
|---------|----------------------|-----------------------|-----------------------|
| 1       | 991,024 <sup>a</sup> | ,076                  | ,102                  |

a. Schätzung beendet bei Iteration Nummer 6, weil die Parameterschätzer sich um weniger als ,001 änderten.

## Klassifizierungstabelle<sup>a</sup>

|           |                   |                       | Vorhergesagt          |       | Prozentsatz der Richtigen |
|-----------|-------------------|-----------------------|-----------------------|-------|---------------------------|
|           |                   |                       | v1_diagn_group<br>AFF | PSYCH |                           |
| Schritt 1 | Beobachtet        | v1_diagn_group<br>AFF | 115                   | 214   | 35,0                      |
|           |                   | PSYCH                 | 81                    | 361   | 81,7                      |
|           | Gesamtprozentsatz |                       |                       |       | 61,7                      |

a. Der Trennwert lautet ,500

## Variablen in der Gleichung

|                        |                       | Regressionsko-<br>effizientB | Standardfehler | Wald  | df |
|------------------------|-----------------------|------------------------------|----------------|-------|----|
| Schritt 1 <sup>a</sup> | v1_sex(1)             | -1,371                       | ,568           | 5,825 | 1  |
|                        | v1_ageBL              | ,029                         | ,037           | ,634  | 1  |
|                        | V1_age <sup>2</sup>   | -,001                        | ,000           | 3,357 | 1  |
|                        | v1_ageBL by v1_sex(1) | ,024                         | ,012           | 3,647 | 1  |
|                        | PC1                   | 3,025                        | 4,760          | ,404  | 1  |
|                        | PC2                   | 5,806                        | 2,605          | 4,970 | 1  |
|                        | PC3                   | -5,582                       | 3,423          | 2,659 | 1  |
|                        | PC4                   | 14,210                       | 4,564          | 9,693 | 1  |
|                        | PC5                   | 9,759                        | 3,527          | 7,655 | 1  |
|                        | z-Faktorwert(PRS_0.4) | ,212                         | ,079           | 7,222 | 1  |
|                        | Konstante             | ,713                         | ,787           | ,822  | 1  |



### Variablen in der Gleichung

|                        |                       |      |             | 95% Konfidenzintervall für EXP (B) |             |
|------------------------|-----------------------|------|-------------|------------------------------------|-------------|
|                        |                       | Sig. | Exp(B)      | Unterer Wert                       | Oberer Wert |
| Schritt 1 <sup>a</sup> | v1_sex(1)             | ,016 | ,254        | ,083                               | ,773        |
|                        | v1_ageBL              | ,426 | 1,030       | ,958                               | 1,107       |
|                        | V1_age <sup>2</sup>   | ,067 | ,999        | ,998                               | 1,000       |
|                        | v1_ageBL by v1_sex(1) | ,056 | 1,024       | ,999                               | 1,049       |
|                        | PC1                   | ,525 | 20,593      | ,002                               | 232091,824  |
|                        | PC2                   | ,026 | 332,388     | 2,017                              | 54777,684   |
|                        | PC3                   | ,103 | ,004        | ,000                               | 3,086       |
|                        | PC4                   | ,002 | 1483133,666 | 193,285                            | 1,138E+10   |
|                        | PC5                   | ,006 | 17309,762   | 17,215                             | 17404907,43 |
|                        | z-Faktorwert(PRS_0.4) | ,007 | 1,236       | 1,059                              | 1,443       |
|                        | Konstante             | ,365 | 2,041       |                                    |             |

a. In Schritt 1 eingegebene Variablen: z-Faktorwert(PRS\_0.4).

```
LOGISTIC REGRESSION VARIABLES v1_diagn_group
/METHOD=ENTER v1_sex v1_ageBL V1_age2 v1_ageBL*v1_sex PC1 PC2 PC3 PC4 PC5
/METHOD=ENTER ZPRS_0.5
/CONTRAST (v1_sex)=Indicator
/CONTRAST (v1_sex)=Indicator
/PRINT=CI(95)
/CRITERIA=PIN(0.05) POUT(0.10) ITERATE(20) CUT(0.5).
```

## Logistische Regression

### Warnungen

Kontrast für diese kategoriale Variable bereits angegeben. Der letzte Kontrast wird verwendet.

### Zusammenfassung der Fallverarbeitung

| Ungewichtete Fälle <sup>a</sup> |                       | N   | Prozent |
|---------------------------------|-----------------------|-----|---------|
| Ausgewählte Fälle               | Einbezogen in Analyse | 771 | 100,0   |
|                                 | Fehlende Fälle        | 0   | ,0      |
|                                 | Gesamt                | 771 | 100,0   |
| Nicht ausgewählte Fälle         |                       | 0   | ,0      |
| Gesamt                          |                       | 771 | 100,0   |

a. Wenn die Gewichtung wirksam ist, finden Sie die Gesamtzahl der Fälle in der Klassifizierungstabelle.

### Codierung abhängiger Variablen

| Ursprünglicher Wert | Interner Wert |
|---------------------|---------------|
| AFF                 | 0             |
| PSYCH               | 1             |

### Codierungen kategorialer Variablen

|        |   | Häufigkeit | Parametercodierung<br>(1) |
|--------|---|------------|---------------------------|
| v1_sex | F | 330        | 1,000                     |
|        | M | 441        | ,000                      |

## Block 0: Anfangsblock

### Klassifizierungstabelle<sup>a,b</sup>

| Beobachtet |                   |       | Vorhergesagt          |       | Prozentsatz der<br>Richtigen |
|------------|-------------------|-------|-----------------------|-------|------------------------------|
|            |                   |       | v1_diagn_group<br>AFF | PSYCH |                              |
| Schritt 0  | v1_diagn_group    | AFF   | 0                     | 329   | ,0                           |
|            |                   | PSYCH | 0                     | 442   | 100,0                        |
|            | Gesamtprozentsatz |       |                       |       | 57,3                         |

a. Konstante in das Modell einbezogen.

b. Der Trennwert lautet ,500

### Variablen in der Gleichung

|           |           | Regressionsko-<br>effizientB | Standardfehler | Wald   | df | Sig. | Exp(B) |
|-----------|-----------|------------------------------|----------------|--------|----|------|--------|
| Schritt 0 | Konstante | ,295                         | ,073           | 16,442 | 1  | ,000 | 1,343  |

### Variablen nicht in der Gleichung<sup>a</sup>

|           |           |                       | Wert   | df | Sig. |
|-----------|-----------|-----------------------|--------|----|------|
| Schritt 0 | Variablen | v1_sex(1)             | 5,672  | 1  | ,017 |
|           |           | v1_ageBL              | 24,553 | 1  | ,000 |
|           |           | V1_age <sup>2</sup>   | 26,804 | 1  | ,000 |
|           |           | v1_ageBL by v1_sex(1) | 7,161  | 1  | ,007 |
|           |           | PC1                   | 2,760  | 1  | ,097 |
|           |           | PC2                   | 3,051  | 1  | ,081 |
|           |           | PC3                   | ,485   | 1  | ,486 |
|           |           | PC4                   | 3,426  | 1  | ,064 |
|           |           | PC5                   | 2,437  | 1  | ,118 |

a. Chi-Quadrate der Residuen werden wegen Redundanzen nicht berechnet.

## Block 1: Methode = Einschluß

### Omnibus-Tests der Modellkoeffizienten

|           |         | Chi-Quadrat | df | Sig. |
|-----------|---------|-------------|----|------|
| Schritt 1 | Schritt | 53,870      | 9  | ,000 |
|           | Block   | 53,870      | 9  | ,000 |
|           | Modell  | 53,870      | 9  | ,000 |

### Modellzusammenfassung

| Schritt | -2 Log-Likelihood    | Cox & Snell R-Quadrat | Nagelkerkes R-Quadrat |
|---------|----------------------|-----------------------|-----------------------|
| 1       | 998,341 <sup>a</sup> | ,067                  | ,091                  |

a. Schätzung beendet bei Iteration Nummer 6, weil die Parameterschätzer sich um weniger als ,001 änderten.

### Klassifizierungstabelle<sup>a</sup>

|            |                   |       | Vorhergesagt   |     |                           |
|------------|-------------------|-------|----------------|-----|---------------------------|
| Beobachtet |                   |       | v1_diagn_group |     | Prozentsatz der Richtigen |
| Schritt 1  | v1_diagn_group    | AFF   | 109            | 220 | 33,1                      |
|            |                   | PSYCH | 76             | 366 | 82,8                      |
|            | Gesamtprozentsatz |       |                |     | 61,6                      |

a. Der Trennwert lautet ,500

### Variablen in der Gleichung

|                        |                       | Regressionsko-<br>effizientB | Standardfehler | Wald  | df |
|------------------------|-----------------------|------------------------------|----------------|-------|----|
| Schritt 1 <sup>a</sup> | v1_sex(1)             | -1,370                       | ,565           | 5,885 | 1  |
|                        | v1_ageBL              | ,026                         | ,037           | ,504  | 1  |
|                        | V1_age <sup>2</sup>   | -,001                        | ,000           | 3,123 | 1  |
|                        | v1_ageBL by v1_sex(1) | ,024                         | ,012           | 3,748 | 1  |
|                        | PC1                   | 3,160                        | 4,592          | ,474  | 1  |
|                        | PC2                   | 4,755                        | 2,431          | 3,828 | 1  |
|                        | PC3                   | -4,365                       | 3,213          | 1,845 | 1  |
|                        | PC4                   | 12,056                       | 4,446          | 7,353 | 1  |
|                        | PC5                   | 8,462                        | 3,484          | 5,898 | 1  |
|                        | Konstante             | ,789                         | ,783           | 1,014 | 1  |

### Variablen in der Gleichung

|                        |                       | Sig. | Exp(B)     | 95% Konfidenzintervall für EXP<br>(B) |             |
|------------------------|-----------------------|------|------------|---------------------------------------|-------------|
|                        |                       |      |            | Unterer Wert                          | Oberer Wert |
| Schritt 1 <sup>a</sup> | v1_sex(1)             | ,015 | ,254       | ,084                                  | ,769        |
|                        | v1_ageBL              | ,478 | 1,026      | ,955                                  | 1,103       |
|                        | V1_age <sup>2</sup>   | ,077 | ,999       | ,998                                  | 1,000       |
|                        | v1_ageBL by v1_sex(1) | ,053 | 1,024      | 1,000                                 | 1,049       |
|                        | PC1                   | ,491 | 23,572     | ,003                                  | 191107,252  |
|                        | PC2                   | ,050 | 116,217    | ,992                                  | 13621,106   |
|                        | PC3                   | ,174 | ,013       | ,000                                  | 6,907       |
|                        | PC4                   | ,007 | 172069,732 | 28,274                                | 1047189713  |
|                        | PC5                   | ,015 | 4730,085   | 5,117                                 | 4372272,224 |
|                        | Konstante             | ,314 | 2,200      |                                       |             |

a. In Schritt 1 eingegebene Variablen: v1\_sex, v1\_ageBL, V1\_age<sup>2</sup>, v1\_ageBL \* v1\_sex, PC1, PC2, PC3, PC4, PC5.

## Block 2: Methode = Einschluß

### Omnibus-Tests der Modellkoeffizienten

|           |         | Chi-Quadrat | df | Sig. |
|-----------|---------|-------------|----|------|
| Schritt 1 | Schritt | 7,207       | 1  | ,007 |
|           | Block   | 7,207       | 1  | ,007 |
|           | Modell  | 61,077      | 10 | ,000 |

## Modellzusammenfassung

| Schritt | -2 Log-Likelihood    | Cox & Snell R-Quadrat | Nagelkerkes R-Quadrat |
|---------|----------------------|-----------------------|-----------------------|
| 1       | 991,135 <sup>a</sup> | ,076                  | ,102                  |

a. Schätzung beendet bei Iteration Nummer 6, weil die Parameterschätzer sich um weniger als ,001 änderten.

## Klassifizierungstabelle<sup>a</sup>

|           |                   |                       | Vorhergesagt          |       | Prozentsatz der Richtigen |
|-----------|-------------------|-----------------------|-----------------------|-------|---------------------------|
|           |                   |                       | v1_diagn_group<br>AFF | PSYCH |                           |
| Schritt 1 | Beobachtet        | v1_diagn_group<br>AFF | 116                   | 213   | 35,3                      |
|           |                   | PSYCH                 | 82                    | 360   | 81,4                      |
|           | Gesamtprozentsatz |                       |                       |       | 61,7                      |

a. Der Trennwert lautet ,500

## Variablen in der Gleichung

|                        |                       | Regressionsko-<br>effizientB | Standardfehler | Wald  | df |
|------------------------|-----------------------|------------------------------|----------------|-------|----|
| Schritt 1 <sup>a</sup> | v1_sex(1)             | -1,371                       | ,568           | 5,832 | 1  |
|                        | v1_ageBL              | ,029                         | ,037           | ,626  | 1  |
|                        | V1_age <sup>2</sup>   | -,001                        | ,000           | 3,349 | 1  |
|                        | v1_ageBL by v1_sex(1) | ,024                         | ,012           | 3,648 | 1  |
|                        | PC1                   | 3,021                        | 4,766          | ,402  | 1  |
|                        | PC2                   | 5,806                        | 2,602          | 4,978 | 1  |
|                        | PC3                   | -5,589                       | 3,420          | 2,670 | 1  |
|                        | PC4                   | 14,217                       | 4,566          | 9,696 | 1  |
|                        | PC5                   | 9,776                        | 3,530          | 7,669 | 1  |
|                        | z-Faktorwert(PRS_0.5) | ,210                         | ,079           | 7,112 | 1  |
|                        | Konstante             | ,719                         | ,786           | ,836  | 1  |

### Variablen in der Gleichung

|                        |                       |      |             | 95% Konfidenzintervall für EXP (B) |             |
|------------------------|-----------------------|------|-------------|------------------------------------|-------------|
|                        |                       | Sig. | Exp(B)      | Unterer Wert                       | Oberer Wert |
| Schritt 1 <sup>a</sup> | v1_sex(1)             | ,016 | ,254        | ,083                               | ,772        |
|                        | v1_ageBL              | ,429 | 1,030       | ,958                               | 1,107       |
|                        | V1_age <sup>2</sup>   | ,067 | ,999        | ,998                               | 1,000       |
|                        | v1_ageBL by v1_sex(1) | ,056 | 1,024       | ,999                               | 1,049       |
|                        | PC1                   | ,526 | 20,504      | ,002                               | 233620,945  |
|                        | PC2                   | ,026 | 332,413     | 2,026                              | 54552,829   |
|                        | PC3                   | ,102 | ,004        | ,000                               | 3,047       |
|                        | PC4                   | ,002 | 1494261,362 | 194,129                            | 1,150E+10   |
|                        | PC5                   | ,006 | 17610,156   | 17,408                             | 17814960,42 |
|                        | z-Faktorwert(PRS_0.5) | ,008 | 1,234       | 1,057                              | 1,441       |
|                        | Konstante             | ,361 | 2,053       |                                    |             |

a. In Schritt 1 eingegebene Variablen: z-Faktorwert(PRS\_0.5).

```
LOGISTIC REGRESSION VARIABLES v1_diagn_group
/METHOD=ENTER v1_sex v1_ageBL V1_age2 v1_ageBL*v1_sex PC1 PC2 PC3 PC4 PC5
/METHOD=ENTER ZPRS_1
/CONTRAST (v1_sex)=Indicator
/CONTRAST (v1_sex)=Indicator
/PRINT=CI(95)
/CRITERIA=PIN(0.05) POUT(0.10) ITERATE(20) CUT(0.5).
```

## Logistische Regression

### Warnungen

Kontrast für diese kategoriale Variable bereits angegeben. Der letzte Kontrast wird verwendet.

### Zusammenfassung der Fallverarbeitung

| Ungewichtete Fälle <sup>a</sup> |                       | N   | Prozent |
|---------------------------------|-----------------------|-----|---------|
| Ausgewählte Fälle               | Einbezogen in Analyse | 771 | 100,0   |
|                                 | Fehlende Fälle        | 0   | ,0      |
|                                 | Gesamt                | 771 | 100,0   |
| Nicht ausgewählte Fälle         |                       | 0   | ,0      |
| Gesamt                          |                       | 771 | 100,0   |

a. Wenn die Gewichtung wirksam ist, finden Sie die Gesamtzahl der Fälle in der Klassifizierungstabelle.

### Codierung abhängiger Variablen

| Ursprünglicher Wert | Interner Wert |
|---------------------|---------------|
| AFF                 | 0             |
| PSYCH               | 1             |

### Codierungen kategorialer Variablen

|        |   | Häufigkeit | Parametercodierung<br>(1) |
|--------|---|------------|---------------------------|
| v1_sex | F | 330        | 1,000                     |
|        | M | 441        | ,000                      |

## Block 0: Anfangsblock

### Klassifizierungstabelle<sup>a,b</sup>

| Beobachtet |                   |       | Vorhergesagt          |       | Prozentsatz der<br>Richtigen |
|------------|-------------------|-------|-----------------------|-------|------------------------------|
|            |                   |       | v1_diagn_group<br>AFF | PSYCH |                              |
| Schritt 0  | v1_diagn_group    | AFF   | 0                     | 329   | ,0                           |
|            |                   | PSYCH | 0                     | 442   | 100,0                        |
|            | Gesamtprozentsatz |       |                       |       | 57,3                         |

a. Konstante in das Modell einbezogen.

b. Der Trennwert lautet ,500

### Variablen in der Gleichung

|           |           | Regressionsko-<br>effizientB | Standardfehler | Wald   | df | Sig. | Exp(B) |
|-----------|-----------|------------------------------|----------------|--------|----|------|--------|
| Schritt 0 | Konstante | ,295                         | ,073           | 16,442 | 1  | ,000 | 1,343  |

### Variablen nicht in der Gleichung<sup>a</sup>

|           |           |                       | Wert   | df | Sig. |
|-----------|-----------|-----------------------|--------|----|------|
| Schritt 0 | Variablen | v1_sex(1)             | 5,672  | 1  | ,017 |
|           |           | v1_ageBL              | 24,553 | 1  | ,000 |
|           |           | V1_age <sup>2</sup>   | 26,804 | 1  | ,000 |
|           |           | v1_ageBL by v1_sex(1) | 7,161  | 1  | ,007 |
|           |           | PC1                   | 2,760  | 1  | ,097 |
|           |           | PC2                   | 3,051  | 1  | ,081 |
|           |           | PC3                   | ,485   | 1  | ,486 |
|           |           | PC4                   | 3,426  | 1  | ,064 |
|           |           | PC5                   | 2,437  | 1  | ,118 |

a. Chi-Quadrate der Residuen werden wegen Redundanzen nicht berechnet.

## Block 1: Methode = Einschluß

### Omnibus-Tests der Modellkoeffizienten

|           |         | Chi-Quadrat | df | Sig. |
|-----------|---------|-------------|----|------|
| Schritt 1 | Schritt | 53,870      | 9  | ,000 |
|           | Block   | 53,870      | 9  | ,000 |
|           | Modell  | 53,870      | 9  | ,000 |

### Modellzusammenfassung

| Schritt | -2 Log-Likelihood    | Cox & Snell R-Quadrat | Nagelkerkes R-Quadrat |
|---------|----------------------|-----------------------|-----------------------|
| 1       | 998,341 <sup>a</sup> | ,067                  | ,091                  |

a. Schätzung beendet bei Iteration Nummer 6, weil die Parameterschätzer sich um weniger als ,001 änderten.

### Klassifizierungstabelle<sup>a</sup>

|           |                   | Vorhergesagt          |       | Prozentsatz der Richtigen |
|-----------|-------------------|-----------------------|-------|---------------------------|
|           |                   | v1_diagn_group<br>AFF | PSYCH |                           |
| Schritt 1 | Beobachtet        |                       |       |                           |
|           | v1_diagn_group    | AFF                   | PSYCH |                           |
|           |                   |                       |       |                           |
|           | AFF               | 109                   | 220   | 33,1                      |
|           | PSYCH             | 76                    | 366   | 82,8                      |
|           | Gesamtprozentsatz |                       |       | 61,6                      |

a. Der Trennwert lautet ,500



### Variablen in der Gleichung

|                        |                       | Regressionsko<br>effizientB | Standardfehler | Wald  | df |
|------------------------|-----------------------|-----------------------------|----------------|-------|----|
| Schritt 1 <sup>a</sup> | v1_sex(1)             | -1,370                      | ,565           | 5,885 | 1  |
|                        | v1_ageBL              | ,026                        | ,037           | ,504  | 1  |
|                        | V1_age <sup>2</sup>   | -,001                       | ,000           | 3,123 | 1  |
|                        | v1_ageBL by v1_sex(1) | ,024                        | ,012           | 3,748 | 1  |
|                        | PC1                   | 3,160                       | 4,592          | ,474  | 1  |
|                        | PC2                   | 4,755                       | 2,431          | 3,828 | 1  |
|                        | PC3                   | -4,365                      | 3,213          | 1,845 | 1  |
|                        | PC4                   | 12,056                      | 4,446          | 7,353 | 1  |
|                        | PC5                   | 8,462                       | 3,484          | 5,898 | 1  |
|                        | Konstante             | ,789                        | ,783           | 1,014 | 1  |

### Variablen in der Gleichung

|                        |                       | Sig. | Exp(B)     | 95% Konfidenzintervall für EXP<br>(B) |             |
|------------------------|-----------------------|------|------------|---------------------------------------|-------------|
|                        |                       |      |            | Unterer Wert                          | Oberer Wert |
| Schritt 1 <sup>a</sup> | v1_sex(1)             | ,015 | ,254       | ,084                                  | ,769        |
|                        | v1_ageBL              | ,478 | 1,026      | ,955                                  | 1,103       |
|                        | V1_age <sup>2</sup>   | ,077 | ,999       | ,998                                  | 1,000       |
|                        | v1_ageBL by v1_sex(1) | ,053 | 1,024      | 1,000                                 | 1,049       |
|                        | PC1                   | ,491 | 23,572     | ,003                                  | 191107,252  |
|                        | PC2                   | ,050 | 116,217    | ,992                                  | 13621,106   |
|                        | PC3                   | ,174 | ,013       | ,000                                  | 6,907       |
|                        | PC4                   | ,007 | 172069,732 | 28,274                                | 1047189713  |
|                        | PC5                   | ,015 | 4730,085   | 5,117                                 | 4372272,224 |
|                        | Konstante             | ,314 | 2,200      |                                       |             |

a. In Schritt 1 eingegebene Variablen: v1\_sex, v1\_ageBL, V1\_age<sup>2</sup>, v1\_ageBL \* v1\_sex, PC1, PC2, PC3, PC4, PC5.

## Block 2: Methode = Einschluß

### Omnibus-Tests der Modellkoeffizienten

|           |         | Chi-Quadrat | df | Sig. |
|-----------|---------|-------------|----|------|
| Schritt 1 | Schritt | 7,138       | 1  | ,008 |
|           | Block   | 7,138       | 1  | ,008 |
|           | Modell  | 61,008      | 10 | ,000 |

## Modellzusammenfassung

| Schritt | -2 Log-Likelihood    | Cox & Snell R-Quadrat | Nagelkerkes R-Quadrat |
|---------|----------------------|-----------------------|-----------------------|
| 1       | 991,203 <sup>a</sup> | ,076                  | ,102                  |

a. Schätzung beendet bei Iteration Nummer 6, weil die Parameterschätzer sich um weniger als ,001 änderten.

## Klassifizierungstabelle<sup>a</sup>

|           |                   |                       | Vorhergesagt          |       | Prozentsatz der Richtigen |
|-----------|-------------------|-----------------------|-----------------------|-------|---------------------------|
|           |                   |                       | v1_diagn_group<br>AFF | PSYCH |                           |
| Schritt 1 | Beobachtet        | v1_diagn_group<br>AFF | 115                   | 214   | 35,0                      |
|           |                   | PSYCH                 | 82                    | 360   | 81,4                      |
|           | Gesamtprozentsatz |                       |                       |       | 61,6                      |

a. Der Trennwert lautet ,500

## Variablen in der Gleichung

|                        |                       | Regressionsko-<br>effizientB | Standardfehler | Wald  | df |
|------------------------|-----------------------|------------------------------|----------------|-------|----|
| Schritt 1 <sup>a</sup> | v1_sex(1)             | -1,368                       | ,568           | 5,808 | 1  |
|                        | v1_ageBL              | ,029                         | ,037           | ,624  | 1  |
|                        | V1_age <sup>2</sup>   | -,001                        | ,000           | 3,336 | 1  |
|                        | v1_ageBL by v1_sex(1) | ,024                         | ,012           | 3,636 | 1  |
|                        | PC1                   | 3,057                        | 4,786          | ,408  | 1  |
|                        | PC2                   | 5,794                        | 2,600          | 4,967 | 1  |
|                        | PC3                   | -5,543                       | 3,415          | 2,634 | 1  |
|                        | PC4                   | 14,215                       | 4,567          | 9,690 | 1  |
|                        | PC5                   | 9,789                        | 3,533          | 7,677 | 1  |
|                        | z-Faktorwert(PRS_1)   | ,209                         | ,079           | 7,046 | 1  |
|                        | Konstante             | ,717                         | ,787           | ,832  | 1  |

### Variablen in der Gleichung

|                        |                       |      |             | 95% Konfidenzintervall für EXP (B) |             |
|------------------------|-----------------------|------|-------------|------------------------------------|-------------|
|                        |                       | Sig. | Exp(B)      | Unterer Wert                       | Oberer Wert |
| Schritt 1 <sup>a</sup> | v1_sex(1)             | ,016 | ,255        | ,084                               | ,775        |
|                        | v1_ageBL              | ,429 | 1,030       | ,958                               | 1,107       |
|                        | V1_age <sup>2</sup>   | ,068 | ,999        | ,998                               | 1,000       |
|                        | v1_ageBL by v1_sex(1) | ,057 | 1,024       | ,999                               | 1,049       |
|                        | PC1                   | ,523 | 21,258      | ,002                               | 251900,079  |
|                        | PC2                   | ,026 | 328,222     | 2,011                              | 53571,882   |
|                        | PC3                   | ,105 | ,004        | ,000                               | 3,161       |
|                        | PC4                   | ,002 | 1491102,863 | 193,378                            | 1,150E+10   |
|                        | PC5                   | ,006 | 17831,885   | 17,536                             | 18132542,72 |
|                        | z-Faktorwert(PRS_1)   | ,008 | 1,233       | 1,056                              | 1,438       |
|                        | Konstante             | ,362 | 2,049       |                                    |             |

a. In Schritt 1 eingegebene Variablen: z-Faktorwert(PRS\_1).

## **2. Analyses of follow-up study participation**

### 2.1 Preparation phenotype data

- Load “phenodata\_v1.1.2\_prep.sav” (N=891)
- Keep only subjects with a baseline visit before 19th of October 2014 (N=678)
- Save as “phenodata\_v1.1.2\_follow\_up.sav”
- Create *follow\_up\_dich* (= are follow up data available) by the following steps: recode *v2\_interv\_date*, *v3\_interv\_date* and *v4\_interv\_date* into *v2\_available*, *v3\_available* and *v4\_available*; sum these variables up (*follow\_up\_available*) and recode into *follow\_up\_dich* (if *follow\_up\_available* is 0, the subject is considered dropout)
- Dropout: N=202; Follow up: N=476

```

GET
  FILE='phenodata_v1.1.2prep.sav'.
DATASET NAME DataSet1 WINDOW=FRONT.

SAVE OUTFILE='phenodata_v1.1.2follow_up.sav'
  /COMPRESSED
SORT CASES BY v1_interv_date(A).

RECODE v2_interv_date (MISSING=0) (ELSE=1) INTO v2_available
VARIABLE LABELS v2_available 'v2_available'.
EXECUTE.
RECODE v3_interv_date (MISSING=0) (ELSE=1) INTO v3_available
VARIABLE LABELS v3_available 'v3_available'.
EXECUTE.
RECODE v4_interv_date (MISSING=0) (ELSE=1) INTO v4_available
VARIABLE LABELS v4_available 'v4_available'.
EXECUTE.
COMPUTE follow_up_available=v2_available + v3_available + v4_available
EXECUTE.
STRING follow_up_dich(A8).
RECODE follow_up_available(0='DROP') (ELSE='FOLLOW') INTO follow_up_dich
VARIABLE LABELS follow_up_dich 'follow_up_dich'.
EXECUTE.
DATASET ACTIVATE DataSet1.

SAVE OUTFILE='v1.1.2\phenodata_v1.1.2follow_up.sav'
  /COMPRESSED
FREQUENCIES VARIABLES=follow_up_dich
  /ORDER=ANALYSIS.

```

## Häufigkeiten

[DataSet1] phenodata\_v1.1.2follow\_up.sav

### Statistiken

follow\_up\_dich

| N | Gültig  | 678 |
|---|---------|-----|
|   | Fehlend | 0   |

### follow\_up\_dich

|        |        | Häufigkeit | Prozent | Gültige<br>Prozente | Kumulierte<br>Prozente |
|--------|--------|------------|---------|---------------------|------------------------|
| Gültig | DROP   | 202        | 29,8    | 29,8                | 29,8                   |
|        | FOLLOW | 476        | 70,2    | 70,2                | 100,0                  |
|        | Gesamt | 678        | 100,0   | 100,0               |                        |

```

GET
  FILE='phenodata_v1.1.2follow_up.sav'.
DATASET NAME DataSet1 WINDOW=FRONT.
DATASET ACTIVATE DataSet1.
LOGISTIC REGRESSION VARIABLES follow_up_dich
  /METHOD=ENTER v1_center v1_sex v1_ageBL v1_age2 v1_ageBL*v1_sex v1_diagn_
group v1_ed_status
  v1_cur_psy_trm_dich v1_dur_illness v1_panss_sum_pos v1_panss_sum_neg v1
_panss_sum_gen v1_idsc_sum
  v1_ymrs_sum v1_gaf
  /CONTRAST (v1_center)=Indicator
  /CONTRAST (v1_sex)=Indicator
  /CONTRAST (v1_sex)=Indicator
  /CONTRAST (v1_diagn_group)=Indicator
  /CONTRAST (v1_cur_psy_trm_dich)=Indicator
  /PRINT=CI(95)
  /CRITERIA=PIN(0.05) POUT(0.10) ITERATE(20) CUT(0.5).

```

## Logistische Regression

[DataSet1] phenodata\_v1.1.2follow\_up.sav

### Warnungen

Text: v1\_center Befehl: LOGISTIC REGRESSION  
 In dieser Prozedur können keine Zeichenfolgevariablen mit einer Länge von mehr als 8 Byte verwendet werden. Die Werte werden abgeschnitten.

Kontrast für diese kategoriale Variable bereits angegeben. Der letzte Kontrast wird verwendet.

### Zusammenfassung der Fallverarbeitung

| Ungewichtete Fälle <sup>a</sup> |                       | N   | Prozent |
|---------------------------------|-----------------------|-----|---------|
| Ausgewählte Fälle               | Einbezogen in Analyse | 498 | 73,5    |
|                                 | Fehlende Fälle        | 180 | 26,5    |
|                                 | Gesamt                | 678 | 100,0   |
| Nicht ausgewählte Fälle         |                       | 0   | ,0      |
| Gesamt                          |                       | 678 | 100,0   |

a. Wenn die Gewichtung wirksam ist, finden Sie die Gesamtzahl der Fälle in der Klassifizierungstabelle.

## Codierung abhängiger Variablen

| Ursprünglicher Wert | Interner Wert |
|---------------------|---------------|
| DROP                | 0             |
| FOLLOW              | 1             |

## Codierungen kategorialer Variablen

|                     |          |            | Parameterkodierung |       |       |       |
|---------------------|----------|------------|--------------------|-------|-------|-------|
|                     |          | Häufigkeit | (1)                | (2)   | (3)   | (4)   |
| v1_center           | Augsburg | 4          | 1,000              | ,000  | ,000  | ,000  |
|                     | Bad Zwis | 37         | ,000               | 1,000 | ,000  | ,000  |
|                     | Bochum   | 19         | ,000               | ,000  | 1,000 | ,000  |
|                     | Bremen O | 19         | ,000               | ,000  | ,000  | 1,000 |
|                     | Eschwege | 4          | ,000               | ,000  | ,000  | ,000  |
|                     | GÃ¶tti   | 5          | ,000               | ,000  | ,000  | ,000  |
|                     | GÃ¼nz    | 80         | ,000               | ,000  | ,000  | ,000  |
|                     | Graz     | 43         | ,000               | ,000  | ,000  | ,000  |
|                     | Hildeshe | 15         | ,000               | ,000  | ,000  | ,000  |
|                     | LÃ¼ne    | 21         | ,000               | ,000  | ,000  | ,000  |
|                     | Liebenbu | 7          | ,000               | ,000  | ,000  | ,000  |
|                     | LMU MÃ¼  | 47         | ,000               | ,000  | ,000  | ,000  |
|                     | OsnabrÃ¼ | 33         | ,000               | ,000  | ,000  | ,000  |
|                     | Rotenbur | 17         | ,000               | ,000  | ,000  | ,000  |
|                     | Tiefenbr | 5          | ,000               | ,000  | ,000  | ,000  |
|                     | UMG GÃ¼  | 130        | ,000               | ,000  | ,000  | ,000  |
|                     | Wilhelms | 12         | ,000               | ,000  | ,000  | ,000  |
| v1_cur_psy_trm_dich | HOSP     | 254        | 1,000              |       |       |       |
|                     | OUT      | 244        | ,000               |       |       |       |
| v1_diagn_group      | AFF      | 179        | 1,000              |       |       |       |
|                     | PSYCH    | 319        | ,000               |       |       |       |
| v1_sex              | F        | 230        | 1,000              |       |       |       |
|                     | M        | 268        | ,000               |       |       |       |



## Codierungen kategorialer Variablen

|                     |          | Parameterkodierung |       |       |       |       |
|---------------------|----------|--------------------|-------|-------|-------|-------|
|                     |          | (5)                | (6)   | (7)   | (8)   | (9)   |
| v1_center           | Augsburg | ,000               | ,000  | ,000  | ,000  | ,000  |
|                     | Bad Zwis | ,000               | ,000  | ,000  | ,000  | ,000  |
|                     | Bochum   | ,000               | ,000  | ,000  | ,000  | ,000  |
|                     | Bremen O | ,000               | ,000  | ,000  | ,000  | ,000  |
|                     | Eschwege | 1,000              | ,000  | ,000  | ,000  | ,000  |
|                     | GÄ¶tti   | ,000               | 1,000 | ,000  | ,000  | ,000  |
|                     | GÄ¶nzb   | ,000               | ,000  | 1,000 | ,000  | ,000  |
|                     | Graz     | ,000               | ,000  | ,000  | 1,000 | ,000  |
|                     | Hildeshe | ,000               | ,000  | ,000  | ,000  | 1,000 |
|                     | LÄ¶neb   | ,000               | ,000  | ,000  | ,000  | ,000  |
|                     | Liebenbu | ,000               | ,000  | ,000  | ,000  | ,000  |
|                     | LMU MÄ   | ,000               | ,000  | ,000  | ,000  | ,000  |
|                     | OsnabrÄ  | ,000               | ,000  | ,000  | ,000  | ,000  |
|                     | Rotenbur | ,000               | ,000  | ,000  | ,000  | ,000  |
|                     | Tiefenbr | ,000               | ,000  | ,000  | ,000  | ,000  |
|                     | UMG GÄ   | ,000               | ,000  | ,000  | ,000  | ,000  |
|                     | Wilhelms | ,000               | ,000  | ,000  | ,000  | ,000  |
| v1_cur_psy_trm_dich | HOSP     |                    |       |       |       |       |
|                     | OUT      |                    |       |       |       |       |
| v1_diagn_group      | AFF      |                    |       |       |       |       |
|                     | PSYCH    |                    |       |       |       |       |
| v1_sex              | F        |                    |       |       |       |       |
|                     | M        |                    |       |       |       |       |

## Codierungen kategorialer Variablen

|                     |          | Parameterkodierung |       |       |       |       |
|---------------------|----------|--------------------|-------|-------|-------|-------|
|                     |          | (10)               | (11)  | (12)  | (13)  | (14)  |
| v1_center           | Augsburg | ,000               | ,000  | ,000  | ,000  | ,000  |
|                     | Bad Zwis | ,000               | ,000  | ,000  | ,000  | ,000  |
|                     | Bochum   | ,000               | ,000  | ,000  | ,000  | ,000  |
|                     | Bremen O | ,000               | ,000  | ,000  | ,000  | ,000  |
|                     | Eschwege | ,000               | ,000  | ,000  | ,000  | ,000  |
|                     | GÄ¶tti   | ,000               | ,000  | ,000  | ,000  | ,000  |
|                     | GÄ¼nzb   | ,000               | ,000  | ,000  | ,000  | ,000  |
|                     | Graz     | ,000               | ,000  | ,000  | ,000  | ,000  |
|                     | Hildeshe | ,000               | ,000  | ,000  | ,000  | ,000  |
|                     | LÄ¼neb   | 1,000              | ,000  | ,000  | ,000  | ,000  |
|                     | Liebenbu | ,000               | 1,000 | ,000  | ,000  | ,000  |
|                     | LMU MÄ   | ,000               | ,000  | 1,000 | ,000  | ,000  |
|                     | OsnabrÄ  | ,000               | ,000  | ,000  | 1,000 | ,000  |
|                     | Rotenbur | ,000               | ,000  | ,000  | ,000  | 1,000 |
|                     | Tiefenbr | ,000               | ,000  | ,000  | ,000  | ,000  |
|                     | UMG GÄ   | ,000               | ,000  | ,000  | ,000  | ,000  |
|                     | Wilhelms | ,000               | ,000  | ,000  | ,000  | ,000  |
| v1_cur_psy_trm_dich | HOSP     |                    |       |       |       |       |
|                     | OUT      |                    |       |       |       |       |
| v1_diagn_group      | AFF      |                    |       |       |       |       |
|                     | PSYCH    |                    |       |       |       |       |
| v1_sex              | F        |                    |       |       |       |       |
|                     | M        |                    |       |       |       |       |

## Codierungen kategorialer Variablen

|                     |             | Parameterkodierung |       |
|---------------------|-------------|--------------------|-------|
|                     |             | (15)               | (16)  |
| v1_center           | Augsburg    | ,000               | ,000  |
|                     | Bad Zwis    | ,000               | ,000  |
|                     | Bochum      | ,000               | ,000  |
|                     | Bremen O    | ,000               | ,000  |
|                     | Eschwege    | ,000               | ,000  |
|                     | GÄttingen   | ,000               | ,000  |
|                     | Gießen      | ,000               | ,000  |
|                     | Graz        | ,000               | ,000  |
|                     | Hildesheim  | ,000               | ,000  |
|                     | Lüneburg    | ,000               | ,000  |
|                     | Liebenburg  | ,000               | ,000  |
|                     | LMU München | ,000               | ,000  |
|                     | Osnabrück   | ,000               | ,000  |
|                     | Rotenburg   | ,000               | ,000  |
|                     | Tiefenbrunn | 1,000              | ,000  |
|                     | UMG Gießen  | ,000               | 1,000 |
|                     | Wilhelms    | ,000               | ,000  |
| v1_cur_psy_trm_dich | HOSP        |                    |       |
|                     | OUT         |                    |       |
| v1_diagn_group      | AFF         |                    |       |
|                     | PSYCH       |                    |       |
| v1_sex              | F           |                    |       |
|                     | M           |                    |       |

## Block 0: Anfangsblock

### Klassifizierungstabelle<sup>a,b</sup>

|                   |                |        | Vorhergesagt           |        | Prozentsatz der<br>Richtigen |
|-------------------|----------------|--------|------------------------|--------|------------------------------|
| Beobachtet        |                |        | follow_up_dich<br>DROP | FOLLOW |                              |
| Schritt 0         | follow_up_dich | DROP   | 0                      | 152    | ,0                           |
|                   |                | FOLLOW | 0                      | 346    | 100,0                        |
| Gesamtprozentsatz |                |        |                        |        | 69,5                         |

a. Konstante in das Modell einbezogen.

b. Der Trennwert lautet ,500

### Variablen in der Gleichung

|           |           | Regressionsko<br>effizientB | Standardfehler | Wald   | df | Sig. | Exp(B) |
|-----------|-----------|-----------------------------|----------------|--------|----|------|--------|
| Schritt 0 | Konstante | ,823                        | ,097           | 71,454 | 1  | ,000 | 2,276  |

### Variablen nicht in der Gleichung<sup>a</sup>

|           |           |                        | Wert   | df | Sig. |
|-----------|-----------|------------------------|--------|----|------|
| Schritt 0 | Variablen | v1_center              | 56,493 | 16 | ,000 |
|           |           | v1_center(1)           | 1,771  | 1  | ,183 |
|           |           | v1_center(2)           | ,724   | 1  | ,395 |
|           |           | v1_center(3)           | 4,553  | 1  | ,033 |
|           |           | v1_center(4)           | ,835   | 1  | ,361 |
|           |           | v1_center(5)           | 1,771  | 1  | ,183 |
|           |           | v1_center(6)           | ,214   | 1  | ,644 |
|           |           | v1_center(7)           | 19,310 | 1  | ,000 |
|           |           | v1_center(8)           | ,092   | 1  | ,762 |
|           |           | v1_center(9)           | ,655   | 1  | ,418 |
|           |           | v1_center(10)          | ,082   | 1  | ,775 |
|           |           | v1_center(11)          | 3,119  | 1  | ,077 |
|           |           | v1_center(12)          | 8,298  | 1  | ,004 |
|           |           | v1_center(13)          | ,001   | 1  | ,977 |
|           |           | v1_center(14)          | 5,039  | 1  | ,025 |
|           |           | v1_center(15)          | ,264   | 1  | ,608 |
|           |           | v1_center(16)          | 12,067 | 1  | ,001 |
|           |           | v1_sex(1)              | ,550   | 1  | ,458 |
|           |           | v1_ageBL               | 28,004 | 1  | ,000 |
|           |           | V1_age <sup>2</sup>    | 25,254 | 1  | ,000 |
|           |           | v1_ageBL by v1_sex(1)  | ,580   | 1  | ,446 |
|           |           | v1_diagn_group(1)      | 1,306  | 1  | ,253 |
|           |           | v1_ed_status           | 2,043  | 1  | ,153 |
|           |           | v1_cur_psy_trm_dich(1) | 47,683 | 1  | ,000 |
|           |           | v1_dur_illness         | 12,468 | 1  | ,000 |
|           |           | v1_panss_sum_pos       | 12,228 | 1  | ,000 |
|           |           | v1_panss_sum_neg       | 4,890  | 1  | ,027 |
|           |           | v1_panss_sum_gen       | 10,808 | 1  | ,001 |
|           |           | v1_idsc_sum            | ,181   | 1  | ,671 |
|           |           | v1_ymrs_sum            | ,047   | 1  | ,829 |
|           |           | v1_gaf                 | 2,425  | 1  | ,119 |

a. Chi-Quadrate der Residuen werden wegen Redundanzen nicht berechnet.

## Block 1: Methode = Einschluß

### Omnibus-Tests der Modellkoeffizienten

|           |         | Chi-Quadrat | df | Sig. |
|-----------|---------|-------------|----|------|
| Schritt 1 | Schritt | 110,891     | 30 | ,000 |
|           | Block   | 110,891     | 30 | ,000 |
|           | Modell  | 110,891     | 30 | ,000 |

### Modellzusammenfassung

| Schritt | -2 Log-Likelihood    | Cox & Snell R-Quadrat | Nagelkerkes R-Quadrat |
|---------|----------------------|-----------------------|-----------------------|
| 1       | 501,871 <sup>a</sup> | ,200                  | ,282                  |

a. Schätzung beendet bei Iteration Nummer 20 weil die Höchstzahl der Iterationen erreicht wurde. Endlösung kann nicht gefunden werden.

### Klassifizierungstabelle<sup>a</sup>

|           |                   |        | Vorhergesagt           |        | Prozentsatz der Richtigen |
|-----------|-------------------|--------|------------------------|--------|---------------------------|
|           |                   |        | follow_up_dich<br>DROP | FOLLOW |                           |
| Schritt 1 | follow_up_dich    | DROP   | 60                     | 92     | 39,5                      |
|           |                   | FOLLOW | 40                     | 306    | 88,4                      |
|           | Gesamtprozentsatz |        |                        |        | 73,5                      |

a. Der Trennwert lautet ,500

### Variablen in der Gleichung

|                        |                        | Regressionsko<br>effizientB | Standardfehler | Wald   | df |
|------------------------|------------------------|-----------------------------|----------------|--------|----|
| Schritt 1 <sup>a</sup> | v1_center              |                             |                | 20,506 | 16 |
|                        | v1_center(1)           | 1,851                       | 21967,782      | ,000   | 1  |
|                        | v1_center(2)           | -19,389                     | 11440,497      | ,000   | 1  |
|                        | v1_center(3)           | -19,958                     | 11440,497      | ,000   | 1  |
|                        | v1_center(4)           | -19,063                     | 11440,497      | ,000   | 1  |
|                        | v1_center(5)           | ,554                        | 22526,837      | ,000   | 1  |
|                        | v1_center(6)           | -20,575                     | 11440,497      | ,000   | 1  |
|                        | v1_center(7)           | -20,216                     | 11440,497      | ,000   | 1  |
|                        | v1_center(8)           | -19,891                     | 11440,497      | ,000   | 1  |
|                        | v1_center(9)           | -20,439                     | 11440,497      | ,000   | 1  |
|                        | v1_center(10)          | -20,005                     | 11440,497      | ,000   | 1  |
|                        | v1_center(11)          | -,074                       | 18877,144      | ,000   | 1  |
|                        | v1_center(12)          | -19,930                     | 11440,497      | ,000   | 1  |
|                        | v1_center(13)          | -20,145                     | 11440,497      | ,000   | 1  |
|                        | v1_center(14)          | -18,140                     | 11440,497      | ,000   | 1  |
|                        | v1_center(15)          | -19,065                     | 11440,497      | ,000   | 1  |
|                        | v1_center(16)          | -18,847                     | 11440,497      | ,000   | 1  |
|                        | v1_sex(1)              | -2,089                      | ,845           | 6,119  | 1  |
|                        | v1_ageBL               | ,076                        | ,058           | 1,708  | 1  |
|                        | V1_age <sup>2</sup>    | -,001                       | ,001           | 1,037  | 1  |
|                        | v1_ageBL by v1_sex(1)  | ,038                        | ,019           | 3,866  | 1  |
|                        | v1_diagn_group(1)      | ,222                        | ,320           | ,482   | 1  |
|                        | v1_ed_status           | ,022                        | ,080           | ,075   | 1  |
|                        | v1_cur_psy_trm_dich(1) | -1,136                      | ,319           | 12,669 | 1  |
|                        | v1_dur_illness         | ,012                        | ,014           | ,778   | 1  |
|                        | v1_panss_sum_pos       | ,004                        | ,035           | ,016   | 1  |
|                        | v1_panss_sum_neg       | ,045                        | ,028           | 2,570  | 1  |
|                        | v1_panss_sum_gen       | -,004                       | ,026           | ,021   | 1  |
|                        | v1_idsc_sum            | -,010                       | ,015           | ,476   | 1  |
|                        | v1_ymrs_sum            | -,012                       | ,026           | ,201   | 1  |
|                        | v1_gaf                 | -,001                       | ,012           | ,016   | 1  |
|                        | Konstante              | 18,774                      | 11440,497      | ,000   | 1  |

### Variablen in der Gleichung

|                        |                        |       |             | 95% Konfidenzintervall für EXP<br>(B) |             |
|------------------------|------------------------|-------|-------------|---------------------------------------|-------------|
|                        |                        | Sig.  | Exp(B)      | Unterer Wert                          | Oberer Wert |
| Schritt 1 <sup>a</sup> | v1_center              | ,198  |             |                                       |             |
|                        | v1_center(1)           | 1,000 | 6,369       | ,000                                  | .           |
|                        | v1_center(2)           | ,999  | ,000        | ,000                                  | .           |
|                        | v1_center(3)           | ,999  | ,000        | ,000                                  | .           |
|                        | v1_center(4)           | ,999  | ,000        | ,000                                  | .           |
|                        | v1_center(5)           | 1,000 | 1,740       | ,000                                  | .           |
|                        | v1_center(6)           | ,999  | ,000        | ,000                                  | .           |
|                        | v1_center(7)           | ,999  | ,000        | ,000                                  | .           |
|                        | v1_center(8)           | ,999  | ,000        | ,000                                  | .           |
|                        | v1_center(9)           | ,999  | ,000        | ,000                                  | .           |
|                        | v1_center(10)          | ,999  | ,000        | ,000                                  | .           |
|                        | v1_center(11)          | 1,000 | ,929        | ,000                                  | .           |
|                        | v1_center(12)          | ,999  | ,000        | ,000                                  | .           |
|                        | v1_center(13)          | ,999  | ,000        | ,000                                  | .           |
|                        | v1_center(14)          | ,999  | ,000        | ,000                                  | .           |
|                        | v1_center(15)          | ,999  | ,000        | ,000                                  | .           |
|                        | v1_center(16)          | ,999  | ,000        | ,000                                  | .           |
|                        | v1_sex(1)              | ,013  | ,124        | ,024                                  | ,648        |
|                        | v1_ageBL               | ,191  | 1,079       | ,963                                  | 1,209       |
|                        | V1_age <sup>2</sup>    | ,308  | ,999        | ,998                                  | 1,001       |
|                        | v1_ageBL by v1_sex(1)  | ,049  | 1,038       | 1,000                                 | 1,078       |
|                        | v1_diagn_group(1)      | ,487  | 1,249       | ,667                                  | 2,338       |
|                        | v1_ed_status           | ,784  | 1,022       | ,874                                  | 1,196       |
|                        | v1_cur_psy_trm_dich(1) | ,000  | ,321        | ,172                                  | ,600        |
|                        | v1_dur_illness         | ,378  | 1,012       | ,985                                  | 1,040       |
|                        | v1_panss_sum_pos       | ,899  | 1,004       | ,937                                  | 1,076       |
|                        | v1_panss_sum_neg       | ,109  | 1,046       | ,990                                  | 1,105       |
|                        | v1_panss_sum_gen       | ,885  | ,996        | ,946                                  | 1,049       |
|                        | v1_idsc_sum            | ,490  | ,990        | ,961                                  | 1,019       |
|                        | v1_ymrs_sum            | ,654  | ,988        | ,939                                  | 1,041       |
|                        | v1_gaf                 | ,898  | ,999        | ,976                                  | 1,022       |
|                        | Konstante              | ,999  | 142312193,0 |                                       |             |

a. In Schritt 1 eingegebene Variablen: v1\_center, v1\_sex, v1\_ageBL, V1\_age<sup>2</sup>, v1\_ageBL \* v1\_sex , v1\_diagn\_group, v1\_ed\_status, v1\_cur\_psy\_trm\_dich, v1\_dur\_illness, v1\_panss\_sum\_pos, v1\_panss\_sum\_neg, v1\_panss\_sum\_gen, v1\_idsc\_sum, v1\_ymrs\_sum, v1\_gaf.

### 2.3 Preparation ancestry principal components (Outcome: follow-up study participation)

- Load data from PCA\_dropouts\_corrected\_id.xlsx and save datafile "PCA\_dropout.sav"
- merge data from "phenodata\_v1.1.2\_follow\_up.sav", "SZ\_PRS\_eleven.sav" and "PCA\_dropout.sav" by ID and select only subjects with SZ-PRS for new dataset "v1.1.2\_PRS\_follow\_up.sav" (N=617)
- test for normal distribution (Kolmogorov-Smirnov-Test)

### 2.4 SZ-PRS analyses of follow-up study participation

- Logistic regression; N = 613



```

GET
  FILE='phenodata_v1.1.2follow_up.sav'.
DATASET NAME DataSet1 WINDOW=FRONT.
GET
  FILE='SZ_PRS_eleven.sav'.
DATASET NAME DataSet2 WINDOW=FRONT.

GET DATA
  /TYPE=XLSX
  /FILE='PCA_Dropouts_corrected_id.xlsx
  /SHEET=name 'Sheet1'
  /CELLRANGE=FULL
  /READNAMES=ON
  /DATATYPEMINPERCENTAGE=95.0
  /HIDDEN IGNORE=YES.
EXECUTE.
DATASET NAME DataSet3 WINDOW=FRONT.

SAVE OUTFILE='PCA_dropout.sav'
  /COMPRESSED
DATASET ACTIVATE DataSet3.

SAVE OUTFILE='PCA_dropout.sav'
  /COMPRESSED
DATASET ACTIVATE DataSet1.
STAR JOIN
  /SELECT t0.v1_interv_date, t0.v1_center, t0.v1_tstlt, t0.v1_sex, t0.v1_age
eBL, t0.v1_age2,
  t0.v1_marital_stat, t0.v1_partner, t0.v1_liv_aln, t0.v1_school, t0.v1_p
rof_dgr, t0.v1_ed_status,
  t0.v1_curr_paid_empl, t0.v1_cur_psy_trm, t0.v1_cur_psy_trm_dich, t0.v1_
age_1st_out_trm,
  t0.v1_age_1st_inpat_trm, t0.v1_dur_illness, t0.v1_cat_daypat_outpat_trm
, t0.v1_scid_dsm_dx_cat,
  t0.v1_diagn_group, t0.v1_panss_p1, t0.v1_panss_p2, t0.v1_panss_p3, t0.v
1_panss_p4, t0.v1_panss_p5,
  t0.v1_panss_p6, t0.v1_panss_p7, t0.v1_panss_n1, t0.v1_panss_n2, t0.v1_p
anss_n3, t0.v1_panss_n4,
  t0.v1_panss_n5, t0.v1_panss_n6, t0.v1_panss_n7, t0.v1_panss_g1, t0.v1_p
anss_g2, t0.v1_panss_g3,
  t0.v1_panss_g4, t0.v1_panss_g5, t0.v1_panss_g6, t0.v1_panss_g7, t0.v1_p
anss_g8, t0.v1_panss_g9,
  t0.v1_panss_g10, t0.v1_panss_g11, t0.v1_panss_g12, t0.v1_panss_g13, t0.

```

```

v1_panss_g14,
    t0.v1_panss_g15, t0.v1_panss_g16, t0.v1_panss_sum_pos, t0.v1_panss_sum_
neg, t0.v1_panss_sum_gen,
    t0.v1_panss_sum_tot, t0.v1_idsc_itm1, t0.v1_idsc_itm2, t0.v1_idsc_itm3,
    t0.v1_idsc_itm4,
    t0.v1_idsc_itm5, t0.v1_idsc_itm6, t0.v1_idsc_itm7, t0.v1_idsc_itm8, t0.
v1_idsc_itm9,
    t0.v1_idsc_itm9a, t0.v1_idsc_itm9b, t0.v1_idsc_itm10, t0.v1_idsc_itm11,
    t0.v1_idsc_itm12,
    t0.v1_idsc_itm13, t0.v1_idsc_itm14, t0.v1_idsc_itm15, t0.v1_idsc_itm16,
    t0.v1_idsc_itm17,
    t0.v1_idsc_itm18, t0.v1_idsc_itm19, t0.v1_idsc_itm20, t0.v1_idsc_itm21,
    t0.v1_idsc_itm22,
    t0.v1_idsc_itm23, t0.v1_idsc_itm24, t0.v1_idsc_itm25, t0.v1_idsc_itm26,
    t0.v1_idsc_itm27,
    t0.v1_idsc_itm28, t0.v1_idsc_itm29, t0.v1_idsc_itm30, t0.v1_idsc_sum, t
0.v1_ymrs_itm1,
    t0.v1_ymrs_itm2, t0.v1_ymrs_itm3, t0.v1_ymrs_itm4, t0.v1_ymrs_itm5, t0.
v1_ymrs_itm6,
    t0.v1_ymrs_itm7, t0.v1_ymrs_itm8, t0.v1_ymrs_itm9, t0.v1_ymrs_itm10, t0
.v1_ymrs_itm11,
    t0.v1_ymrs_sum, t0.v1_gaf, t0.v2_interv_date, t0.v2_ill_ep_snc_lst, t0.
v2_gaf, t0.v3_interv_date,
    t0.v3_ill_ep_snc_lst, t0.v3_gaf, t0.v4_interv_date, t0.v4_ill_ep_snc_ls
t, t0.v4_gaf,
    t0.v2_available, t0.v3_available, t0.v4_available, t0.follow_up_availab
le, t0.follow_up_dich,
    t1.PRS_0.00000005, t1.PRS_0.0001, t1.PRS_0.001, t1.PRS_0.01, t1.PRS_0.0
5, t1.PRS_0.1, t1.PRS_0.2,
    t1.PRS_0.3, t1.PRS_0.4, t1.PRS_0.5, t1.PRS_1
/FROM * AS t0
/JOIN 'DataSet2' AS t1
    ON t0.id=t1.id
/OUTFILE FILE=*.
STAR JOIN
    /SELECT t0.v1_interv_date, t0.v1_center, t0.v1_tstlt, t0.v1_sex, t0.v1_ag
eBL, t0.v1_age2,
    t0.v1_marital_stat, t0.v1_partner, t0.v1_liv_aln, t0.v1_school, t0.v1_p
rof_dgr, t0.v1_ed_status,
    t0.v1_curr_paid_empl, t0.v1_cur_psy_trm, t0.v1_cur_psy_trm_dich, t0.v1_
age_1st_out_trm,
    t0.v1_age_1st_inpat_trm, t0.v1_dur_illness, t0.v1_cat_daypat_outpat_trm
, t0.v1_scid_dsm_dx_cat,
    t0.v1_diagn_group, t0.v1_panss_p1, t0.v1_panss_p2, t0.v1_panss_p3, t0.v
1_panss_p4, t0.v1_panss_p5,

```

```

t0.v1_panss_p6, t0.v1_panss_p7, t0.v1_panss_n1, t0.v1_panss_n2, t0.v1_p
anss_n3, t0.v1_panss_n4,
t0.v1_panss_n5, t0.v1_panss_n6, t0.v1_panss_n7, t0.v1_panss_g1, t0.v1_p
anss_g2, t0.v1_panss_g3,
t0.v1_panss_g4, t0.v1_panss_g5, t0.v1_panss_g6, t0.v1_panss_g7, t0.v1_p
anss_g8, t0.v1_panss_g9,
t0.v1_panss_g10, t0.v1_panss_g11, t0.v1_panss_g12, t0.v1_panss_g13, t0.
v1_panss_g14,
t0.v1_panss_g15, t0.v1_panss_g16, t0.v1_panss_sum_pos, t0.v1_panss_sum_
neg, t0.v1_panss_sum_gen,
t0.v1_panss_sum_tot, t0.v1_idsc_itm1, t0.v1_idsc_itm2, t0.v1_idsc_itm3,
t0.v1_idsc_itm4,
t0.v1_idsc_itm5, t0.v1_idsc_itm6, t0.v1_idsc_itm7, t0.v1_idsc_itm8, t0.
v1_idsc_itm9,
t0.v1_idsc_itm9a, t0.v1_idsc_itm9b, t0.v1_idsc_itm10, t0.v1_idsc_itm11,
t0.v1_idsc_itm12,
t0.v1_idsc_itm13, t0.v1_idsc_itm14, t0.v1_idsc_itm15, t0.v1_idsc_itm16,
t0.v1_idsc_itm17,
t0.v1_idsc_itm18, t0.v1_idsc_itm19, t0.v1_idsc_itm20, t0.v1_idsc_itm21,
t0.v1_idsc_itm22,
t0.v1_idsc_itm23, t0.v1_idsc_itm24, t0.v1_idsc_itm25, t0.v1_idsc_itm26,
t0.v1_idsc_itm27,
t0.v1_idsc_itm28, t0.v1_idsc_itm29, t0.v1_idsc_itm30, t0.v1_idsc_sum, t
0.v1_ymrs_itm1,
t0.v1_ymrs_itm2, t0.v1_ymrs_itm3, t0.v1_ymrs_itm4, t0.v1_ymrs_itm5, t0.
v1_ymrs_itm6,
t0.v1_ymrs_itm7, t0.v1_ymrs_itm8, t0.v1_ymrs_itm9, t0.v1_ymrs_itm10, t0
.v1_ymrs_itm11,
t0.v1_ymrs_sum, t0.v1_gaf, t0.v2_interv_date, t0.v2_ill_ep_snc_lst, t0.
v2_gaf, t0.v3_interv_date,
t0.v3_ill_ep_snc_lst, t0.v3_gaf, t0.v4_interv_date, t0.v4_ill_ep_snc_ls
t, t0.v4_gaf,
t0.v2_available, t0.v3_available, t0.v4_available, t0.follow_up_availab
le, t0.follow_up_dich,
t0.PRS_0.00000005, t0.PRS_0.0001, t0.PRS_0.001, t0.PRS_0.01, t0.PRS_0.0
5, t0.PRS_0.1, t0.PRS_0.2,
t0.PRS_0.3, t0.PRS_0.4, t0.PRS_0.5, t0.PRS_1, t1.PC1, t1.PC2, t1.PC3, t
1.PC4, t1.PC5, t1.PC6,
t1.PC7, t1.PC8, t1.PC9, t1.PC10, t1.PC11, t1.PC12, t1.PC13, t1.PC14, t1
.PC15, t1.PC16, t1.PC17,
t1.PC18, t1.PC19, t1.PC20
/FROM * AS t0
/JOIN 'DataSet3' AS t1
ON t0.id=t1.id
/OUTFILE FILE=*.

```

```

SAVE OUTFILE='v1.1.2_PRS_follow_up.sav'
/COMPRESSED
SORT CASES BY PRS_0.00000005(A).
SORT CASES BY PC1(A).
DATASET ACTIVATE DataSet1.

SAVE OUTFILE='v1.1.2_PRS_follow_up.sav'
/COMPRESSED
DATASET CLOSE DataSet2.
DATASET CLOSE DataSet3.
DESCRIPTIVES VARIABLES=PRS_0.00000005 PRS_0.0001 PRS_0.001 PRS_0.01 PRS_0.0
5 PRS_0.1 PRS_0.2
PRS_0.3 PRS_0.4 PRS_0.5 PRS_1
/SAVE
/STATISTICS=MEAN STDDEV MIN MAX.

```

## Deskriptive Statistik

Deskriptive Statistik

|                             | N   | Minimum     | Maximum     | Mittelwert  |
|-----------------------------|-----|-------------|-------------|-------------|
| PRS_0.00000005              | 617 | -,495331000 | ,2734380000 | -,052093295 |
| PRS_0.0001                  | 617 | -1,12710000 | ,8655940000 | -,070016555 |
| PRS_0.001                   | 617 | -2,13727000 | 1,023010000 | -,577020999 |
| PRS_0.01                    | 617 | -4,27742000 | ,9645150000 | -2,17844588 |
| PRS_0.05                    | 617 | -6,36176000 | ,8692340000 | -3,37381756 |
| PRS_0.1                     | 617 | -8,14688000 | ,1052410000 | -4,41608635 |
| PRS_0.2                     | 617 | -9,82038000 | -,659261000 | -5,56458477 |
| PRS_0.3                     | 617 | -10,3739000 | -,862606000 | -6,04619646 |
| PRS_0.4                     | 617 | -11,0241000 | -1,18485000 | -6,52689992 |
| PRS_0.5                     | 617 | -11,0369000 | -1,31570000 | -6,65389136 |
| PRS_1                       | 617 | -11,9026000 | -2,02100000 | -7,45132840 |
| Gültige Werte (Listenweise) | 617 |             |             |             |

## Deskriptive Statistik

|                             | Standardabweichung |
|-----------------------------|--------------------|
| PRS_0.00000005              | ,1165826094        |
| PRS_0.0001                  | ,3255235410        |
| PRS_0.001                   | ,4884630589        |
| PRS_0.01                    | ,7631075404        |
| PRS_0.05                    | 1,058628567        |
| PRS_0.1                     | 1,194021991        |
| PRS_0.2                     | 1,326841864        |
| PRS_0.3                     | 1,376693083        |
| PRS_0.4                     | 1,395063102        |
| PRS_0.5                     | 1,418850687        |
| PRS_1                       | 1,433039644        |
| Gültige Werte (Listenweise) |                    |

\*Nonparametric Tests: One Sample.

NPTESTS

```
/ONESAMPLE TEST (PRS_0.00000005 PRS_0.0001 PRS_0.001 PRS_0.01 PRS_0.05 PRS_0.1 PRS_0.2 PRS_0.3 PRS_0.4 PRS_0.5 PRS_1)
/MISSING SCOPE=ANALYSIS USERMISSING=EXCLUDE
/CRITERIA ALPHA=0.05 CILEVEL=95.
```

## Nicht parametrische Tests

### Hypothesentestübersicht

|    | Nullhypothese                                                                                                | Test                                         | Sig.                | Entscheidung              |
|----|--------------------------------------------------------------------------------------------------------------|----------------------------------------------|---------------------|---------------------------|
| 1  | Die Verteilung von PRS_0.00000005 ist normal mit Mittelwert -0,052093295408428 und Standardabweichung 0,117. | Kolmogorov-Smirnov-Test bei einer Stichprobe | ,200 <sup>1,2</sup> | Nullhypothese beibehalten |
| 2  | Die Verteilung von PRS_0.0001 ist normal mit Mittelwert -0,070016554619124 und Standardabweichung 0,326.     | Kolmogorov-Smirnov-Test bei einer Stichprobe | ,200 <sup>1,2</sup> | Nullhypothese beibehalten |
| 3  | Die Verteilung von PRS_0.001 ist normal mit Mittelwert -0,577020999481361 und Standardabweichung 0,488.      | Kolmogorov-Smirnov-Test bei einer Stichprobe | ,200 <sup>1,2</sup> | Nullhypothese beibehalten |
| 4  | Die Verteilung von PRS_0.01 ist normal mit Mittelwert -2,178445883306320 und Standardabweichung 0,763.       | Kolmogorov-Smirnov-Test bei einer Stichprobe | ,200 <sup>1,2</sup> | Nullhypothese beibehalten |
| 5  | Die Verteilung von PRS_0.05 ist normal mit Mittelwert -3,373817555915720 und Standardabweichung 1,059.       | Kolmogorov-Smirnov-Test bei einer Stichprobe | ,200 <sup>1,2</sup> | Nullhypothese beibehalten |
| 6  | Die Verteilung von PRS_0.1 ist normal mit Mittelwert -4,416086346839550 und Standardabweichung 1,194.        | Kolmogorov-Smirnov-Test bei einer Stichprobe | ,200 <sup>1,2</sup> | Nullhypothese beibehalten |
| 7  | Die Verteilung von PRS_0.2 ist normal mit Mittelwert -5,564584766612640 und Standardabweichung 1,327.        | Kolmogorov-Smirnov-Test bei einer Stichprobe | ,200 <sup>1,2</sup> | Nullhypothese beibehalten |
| 8  | Die Verteilung von PRS_0.3 ist normal mit Mittelwert -6,046196460291740 und Standardabweichung 1,377.        | Kolmogorov-Smirnov-Test bei einer Stichprobe | ,200 <sup>1,2</sup> | Nullhypothese beibehalten |
| 9  | Die Verteilung von PRS_0.4 ist normal mit Mittelwert -6,526899918962720 und Standardabweichung 1,395.        | Kolmogorov-Smirnov-Test bei einer Stichprobe | ,200 <sup>1,2</sup> | Nullhypothese beibehalten |
| 10 | Die Verteilung von PRS_0.5 ist normal mit Mittelwert -6,653891361426250 und Standardabweichung 1,419.        | Kolmogorov-Smirnov-Test bei einer Stichprobe | ,155 <sup>1</sup>   | Nullhypothese beibehalten |
| 11 | Die Verteilung von PRS_1 ist normal mit Mittelwert -7,451328395461910 und Standardabweichung 1,433.          | Kolmogorov-Smirnov-Test bei einer Stichprobe | ,200 <sup>1,2</sup> | Nullhypothese beibehalten |

Asymptotische Signifikanzen werden angezeigt. Das Signifikanzniveau ist ,05.

```
LOGISTIC REGRESSION VARIABLES follow_up_dich
  /METHOD=ENTER v1_sex v1_ageBL*v1_sex v1_cur_psy_trm_dich PC1 PC2 PC3 PC4
PC5
  /METHOD=ENTER ZPRS_0.00000005
  /CONTRAST (v1_sex)=Indicator
  /CONTRAST (v1_sex)=Indicator
  /CONTRAST (v1_cur_psy_trm_dich)=Indicator
  /PRINT=CI(95)
  /CRITERIA=PIN(0.05) POUT(0.10) ITERATE(20) CUT(0.5).
```

## Logistische Regression

### Warnungen

Kontrast für diese kategoriale Variable bereits angegeben. Der letzte Kontrast wird verwendet.

### Zusammenfassung der Fallverarbeitung

| Ungewichtete Fälle <sup>a</sup> |                       | N   | Prozent |
|---------------------------------|-----------------------|-----|---------|
| Ausgewählte Fälle               | Einbezogen in Analyse | 613 | 99,4    |
|                                 | Fehlende Fälle        | 4   | ,6      |
|                                 | Gesamt                | 617 | 100,0   |
| Nicht ausgewählte Fälle         |                       | 0   | ,0      |
| Gesamt                          |                       | 617 | 100,0   |

a. Wenn die Gewichtung wirksam ist, finden Sie die Gesamtzahl der Fälle in der Klassifizierungstabelle.

### Codierung abhängiger Variablen

| Ursprünglicher Wert | Interner Wert |
|---------------------|---------------|
| DROP                | 0             |
| FOLLOW              | 1             |

### Codierungen kategorialer Variablen

|                     |      |            | Parametercode-<br>rung<br>(1) |
|---------------------|------|------------|-------------------------------|
|                     |      | Häufigkeit |                               |
| v1_cur_psy_trm_dich | HOSP | 292        | 1,000                         |
|                     | OUT  | 321        | ,000                          |
| v1_sex              | F    | 277        | 1,000                         |
|                     | M    | 336        | ,000                          |

## Block 0: Anfangsblock

**Klassifizierungstabelle<sup>a,b</sup>**

|           |                   |        | Vorhergesagt           |        | Prozentsatz der<br>Richtigen |
|-----------|-------------------|--------|------------------------|--------|------------------------------|
|           |                   |        | follow_up_dich<br>DROP | FOLLOW |                              |
| Schritt 0 | follow_up_dich    | DROP   | 0                      | 172    | ,0                           |
|           |                   | FOLLOW | 0                      | 441    | 100,0                        |
|           | Gesamtprozentsatz |        |                        |        | 71,9                         |

a. Konstante in das Modell einbezogen.

b. Der Trennwert lautet ,500

### Variablen in der Gleichung

|           |           | Regressionsko<br>effizientB | Standardfehler | Wald    | df | Sig. | Exp(B) |
|-----------|-----------|-----------------------------|----------------|---------|----|------|--------|
| Schritt 0 | Konstante | ,942                        | ,090           | 109,697 | 1  | ,000 | 2,564  |

### Variablen nicht in der Gleichung

|           |                 |                        | Wert   | df | Sig. |
|-----------|-----------------|------------------------|--------|----|------|
| Schritt 0 | Variablen       | v1_sex(1)              | ,017   | 1  | ,896 |
|           |                 | v1_ageBL by v1_sex(1)  | 1,785  | 1  | ,182 |
|           |                 | v1_cur_psy_trm_dich(1) | 44,518 | 1  | ,000 |
|           |                 | PC1                    | ,127   | 1  | ,722 |
|           |                 | PC2                    | ,114   | 1  | ,736 |
|           |                 | PC3                    | 1,074  | 1  | ,300 |
|           |                 | PC4                    | ,093   | 1  | ,760 |
|           |                 | PC5                    | 2,643  | 1  | ,104 |
|           | Gesamtstatistik |                        | 56,690 | 8  | ,000 |

## Block 1: Methode = Einschluß

### Omnibus-Tests der Modellkoeffizienten

|           |         | Chi-Quadrat | df | Sig. |
|-----------|---------|-------------|----|------|
| Schritt 1 | Schritt | 58,714      | 8  | ,000 |
|           | Block   | 58,714      | 8  | ,000 |
|           | Modell  | 58,714      | 8  | ,000 |



## Modellzusammenfassung

| Schritt | -2 Log-Likelihood    | Cox & Snell R-Quadrat | Nagelkerkes R-Quadrat |
|---------|----------------------|-----------------------|-----------------------|
| 1       | 668,926 <sup>a</sup> | ,091                  | ,131                  |

a. Schätzung beendet bei Iteration Nummer 6, weil die Parameterschätzer sich um weniger als ,001 änderten.

## Klassifizierungstabelle<sup>a</sup>

| Beobachtet        |                | Vorhergesagt           |        | Prozentsatz der Richtigen |
|-------------------|----------------|------------------------|--------|---------------------------|
|                   |                | follow_up_dich<br>DROP | FOLLOW |                           |
| Schritt 1         | follow_up_dich |                        |        |                           |
|                   | DROP           | 20                     | 152    | 11,6                      |
|                   | FOLLOW         | 16                     | 425    | 96,4                      |
| Gesamtprozentsatz |                |                        |        | 72,6                      |

a. Der Trennwert lautet ,500

## Variablen in der Gleichung

|                        |                        | Regressionsko<br>effizientB | Standardfehler | Wald   | df |
|------------------------|------------------------|-----------------------------|----------------|--------|----|
| Schritt 1 <sup>a</sup> | v1_sex(1)              | -1,837                      | ,574           | 10,224 | 1  |
|                        | v1_ageBL by v1_sex(1)  | ,040                        | ,012           | 10,486 | 1  |
|                        | v1_cur_psy_trm_dich(1) | -1,233                      | ,196           | 39,741 | 1  |
|                        | PC1                    | ,411                        | 3,037          | ,018   | 1  |
|                        | PC2                    | 1,532                       | 3,959          | ,150   | 1  |
|                        | PC3                    | 3,493                       | 4,610          | ,574   | 1  |
|                        | PC4                    | -,769                       | 2,677          | ,083   | 1  |
|                        | PC5                    | ,753                        | 2,453          | ,094   | 1  |
|                        | Konstante              | 1,643                       | ,178           | 84,933 | 1  |

### Variablen in der Gleichung

|                        |                        |      |        | 95% Konfidenzintervall für EXP (B) |             |
|------------------------|------------------------|------|--------|------------------------------------|-------------|
|                        |                        | Sig. | Exp(B) | Unterer Wert                       | Oberer Wert |
| Schritt 1 <sup>a</sup> | v1_sex(1)              | ,001 | ,159   | ,052                               | ,491        |
|                        | v1_ageBL by v1_sex(1)  | ,001 | 1,041  | 1,016                              | 1,067       |
|                        | v1_cur_psy_trm_dich(1) | ,000 | ,291   | ,199                               | ,428        |
|                        | PC1                    | ,892 | 1,508  | ,004                               | 579,835     |
|                        | PC2                    | ,699 | 4,626  | ,002                               | 10845,660   |
|                        | PC3                    | ,449 | 32,896 | ,004                               | 276356,352  |
|                        | PC4                    | ,774 | ,463   | ,002                               | 88,017      |
|                        | PC5                    | ,759 | 2,123  | ,017                               | 259,945     |
|                        | Konstante              | ,000 | 5,170  |                                    |             |

a. In Schritt 1 eingegebene Variablen: v1\_sex, v1\_ageBL \* v1\_sex, v1\_cur\_psy\_trm\_dich, PC1, PC2, PC3, PC4, PC5.

## Block 2: Methode = Einschluß

### Omnibus-Tests der Modellkoeffizienten

|           |         | Chi-Quadrat | df | Sig. |
|-----------|---------|-------------|----|------|
| Schritt 1 | Schritt | ,143        | 1  | ,705 |
|           | Block   | ,143        | 1  | ,705 |
|           | Modell  | 58,857      | 9  | ,000 |

### Modellzusammenfassung

| Schritt | -2 Log-Likelihood    | Cox & Snell R-Quadrat | Nagelkerkes R-Quadrat |
|---------|----------------------|-----------------------|-----------------------|
| 1       | 668,783 <sup>a</sup> | ,092                  | ,132                  |

a. Schätzung beendet bei Iteration Nummer 6, weil die Parameterschätzer sich um weniger als ,001 änderten.

### Klassifizierungstabelle<sup>a</sup>

|                   |                | Vorhergesagt           |        | Prozentsatz der Richtigen |
|-------------------|----------------|------------------------|--------|---------------------------|
|                   |                | follow_up_dich<br>DROP | FOLLOW |                           |
| Schritt 1         | follow_up_dich |                        |        |                           |
|                   | DROP           | 21                     | 151    | 12,2                      |
|                   | FOLLOW         | 17                     | 424    | 96,1                      |
| Gesamtprozentsatz |                |                        |        | 72,6                      |

a. Der Trennwert lautet ,500

### Variablen in der Gleichung

|                        |                                  | Regressionsko<br>effizientB | Standardfehler | Wald   | df |
|------------------------|----------------------------------|-----------------------------|----------------|--------|----|
| Schritt 1 <sup>a</sup> | v1_sex(1)                        | -1,837                      | ,574           | 10,233 | 1  |
|                        | v1_ageBL by v1_sex(1)            | ,040                        | ,012           | 10,474 | 1  |
|                        | v1_cur_psy_trm_dich(1)           | -1,230                      | ,196           | 39,517 | 1  |
|                        | PC1                              | ,402                        | 3,047          | ,017   | 1  |
|                        | PC2                              | 1,465                       | 3,966          | ,136   | 1  |
|                        | PC3                              | 3,561                       | 4,617          | ,595   | 1  |
|                        | PC4                              | -,741                       | 2,683          | ,076   | 1  |
|                        | PC5                              | ,695                        | 2,458          | ,080   | 1  |
|                        | z-Faktorwert(PRS_0.<br>00000005) | -,036                       | ,094           | ,143   | 1  |
|                        | Konstante                        | 1,643                       | ,178           | 84,903 | 1  |

### Variablen in der Gleichung

|                        |                                  | Sig. | Exp(B) | 95% Konfidenzintervall für EXP<br>(B) |             |
|------------------------|----------------------------------|------|--------|---------------------------------------|-------------|
|                        |                                  |      |        | Unterer Wert                          | Oberer Wert |
| Schritt 1 <sup>a</sup> | v1_sex(1)                        | ,001 | ,159   | ,052                                  | ,491        |
|                        | v1_ageBL by v1_sex(1)            | ,001 | 1,041  | 1,016                                 | 1,067       |
|                        | v1_cur_psy_trm_dich(1)           | ,000 | ,292   | ,199                                  | ,429        |
|                        | PC1                              | ,895 | 1,494  | ,004                                  | 586,673     |
|                        | PC2                              | ,712 | 4,328  | ,002                                  | 10287,947   |
|                        | PC3                              | ,441 | 35,208 | ,004                                  | 299738,384  |
|                        | PC4                              | ,782 | ,477   | ,002                                  | 91,591      |
|                        | PC5                              | ,778 | 2,003  | ,016                                  | 247,637     |
|                        | z-Faktorwert(PRS_0.<br>00000005) | ,705 | ,965   | ,803                                  | 1,160       |
|                        | Konstante                        | ,000 | 5,171  |                                       |             |

a. In Schritt 1 eingegebene Variablen: z-Faktorwert(PRS\_0.00000005).

```
LOGISTIC REGRESSION VARIABLES follow_up_dich
/METHOD=ENTER v1_sex v1_ageBL*v1_sex v1_cur_psy_trm_dich PC1 PC2 PC3 PC4
PC5
/METHOD=ENTER ZPRS_0.0001
/CONTRAST (v1_sex)=Indicator
/CONTRAST (v1_sex)=Indicator
/CONTRAST (v1_cur_psy_trm_dich)=Indicator
/PRINT=CI(95)
/CRITERIA=PIN(0.05) POUT(0.10) ITERATE(20) CUT(0.5).
```

# Logistische Regression

## Warnungen

Kontrast für diese kategoriale Variable bereits angegeben. Der letzte Kontrast wird verwendet.

## Zusammenfassung der Fallverarbeitung

| Ungewichtete Fälle <sup>a</sup> |                       | N   | Prozent |
|---------------------------------|-----------------------|-----|---------|
| Ausgewählte Fälle               | Einbezogen in Analyse | 613 | 99,4    |
|                                 | Fehlende Fälle        | 4   | ,6      |
|                                 | Gesamt                | 617 | 100,0   |
| Nicht ausgewählte Fälle         |                       | 0   | ,0      |
| Gesamt                          |                       | 617 | 100,0   |

a. Wenn die Gewichtung wirksam ist, finden Sie die Gesamtzahl der Fälle in der Klassifizierungstabelle.

## Codierung abhängiger Variablen

| Ursprünglicher Wert | Interner Wert |
|---------------------|---------------|
| DROP                | 0             |
| FOLLOW              | 1             |

## Codierungen kategorialer Variablen

|                     |      | Häufigkeit | Parametercodierung<br>(1) |
|---------------------|------|------------|---------------------------|
| v1_cur_psy_trm_dich | HOSP | 292        | 1,000                     |
|                     | OUT  | 321        | ,000                      |
| v1_sex              | F    | 277        | 1,000                     |
|                     | M    | 336        | ,000                      |

## Block 0: Anfangsblock

### Klassifizierungstabelle<sup>a,b</sup>

|           |                   |        | Vorhergesagt           |        | Prozentsatz der<br>Richtigen |
|-----------|-------------------|--------|------------------------|--------|------------------------------|
|           |                   |        | follow_up_dich<br>DROP | FOLLOW |                              |
| Schritt 0 | follow_up_dich    | DROP   | 0                      | 172    | ,0                           |
|           |                   | FOLLOW | 0                      | 441    | 100,0                        |
|           | Gesamtprozentsatz |        |                        |        | 71,9                         |

a. Konstante in das Modell einbezogen.

b. Der Trennwert lautet ,500

### Variablen in der Gleichung

|           |           | Regressionsko<br>effizientB | Standardfehler | Wald    | df | Sig. | Exp(B) |
|-----------|-----------|-----------------------------|----------------|---------|----|------|--------|
| Schritt 0 | Konstante | ,942                        | ,090           | 109,697 | 1  | ,000 | 2,564  |

### Variablen nicht in der Gleichung

|           |                 |                        | Wert   | df | Sig. |
|-----------|-----------------|------------------------|--------|----|------|
| Schritt 0 | Variablen       | v1_sex(1)              | ,017   | 1  | ,896 |
|           |                 | v1_ageBL by v1_sex(1)  | 1,785  | 1  | ,182 |
|           |                 | v1_cur_psy_trm_dich(1) | 44,518 | 1  | ,000 |
|           |                 | PC1                    | ,127   | 1  | ,722 |
|           |                 | PC2                    | ,114   | 1  | ,736 |
|           |                 | PC3                    | 1,074  | 1  | ,300 |
|           |                 | PC4                    | ,093   | 1  | ,760 |
|           |                 | PC5                    | 2,643  | 1  | ,104 |
|           | Gesamtstatistik |                        | 56,690 | 8  | ,000 |

## Block 1: Methode = Einschluß

### Omnibus-Tests der Modellkoeffizienten

|           |         | Chi-Quadrat | df | Sig. |
|-----------|---------|-------------|----|------|
| Schritt 1 | Schritt | 58,714      | 8  | ,000 |
|           | Block   | 58,714      | 8  | ,000 |
|           | Modell  | 58,714      | 8  | ,000 |

## Modellzusammenfassung

| Schritt | -2 Log-Likelihood    | Cox & Snell R-Quadrat | Nagelkerkes R-Quadrat |
|---------|----------------------|-----------------------|-----------------------|
| 1       | 668,926 <sup>a</sup> | ,091                  | ,131                  |

a. Schätzung beendet bei Iteration Nummer 6, weil die Parameterschätzer sich um weniger als ,001 änderten.

## Klassifizierungstabelle<sup>a</sup>

| Beobachtet        |                | Vorhergesagt           |        | Prozentsatz der Richtigen |
|-------------------|----------------|------------------------|--------|---------------------------|
|                   |                | follow_up_dich<br>DROP | FOLLOW |                           |
| Schritt 1         | follow_up_dich |                        |        |                           |
|                   | DROP           | 20                     | 152    | 11,6                      |
|                   | FOLLOW         | 16                     | 425    | 96,4                      |
| Gesamtprozentsatz |                |                        |        | 72,6                      |

a. Der Trennwert lautet ,500

## Variablen in der Gleichung

|                        |                        | Regressionsko<br>effizientB | Standardfehler | Wald   | df |
|------------------------|------------------------|-----------------------------|----------------|--------|----|
| Schritt 1 <sup>a</sup> | v1_sex(1)              | -1,837                      | ,574           | 10,224 | 1  |
|                        | v1_ageBL by v1_sex(1)  | ,040                        | ,012           | 10,486 | 1  |
|                        | v1_cur_psy_trm_dich(1) | -1,233                      | ,196           | 39,741 | 1  |
|                        | PC1                    | ,411                        | 3,037          | ,018   | 1  |
|                        | PC2                    | 1,532                       | 3,959          | ,150   | 1  |
|                        | PC3                    | 3,493                       | 4,610          | ,574   | 1  |
|                        | PC4                    | -,769                       | 2,677          | ,083   | 1  |
|                        | PC5                    | ,753                        | 2,453          | ,094   | 1  |
|                        | Konstante              | 1,643                       | ,178           | 84,933 | 1  |

### Variablen in der Gleichung

|                        |                        |      |        | 95% Konfidenzintervall für EXP<br>(B) |             |
|------------------------|------------------------|------|--------|---------------------------------------|-------------|
|                        |                        | Sig. | Exp(B) | Unterer Wert                          | Oberer Wert |
| Schritt 1 <sup>a</sup> | v1_sex(1)              | ,001 | ,159   | ,052                                  | ,491        |
|                        | v1_ageBL by v1_sex(1)  | ,001 | 1,041  | 1,016                                 | 1,067       |
|                        | v1_cur_psy_trm_dich(1) | ,000 | ,291   | ,199                                  | ,428        |
|                        | PC1                    | ,892 | 1,508  | ,004                                  | 579,835     |
|                        | PC2                    | ,699 | 4,626  | ,002                                  | 10845,660   |
|                        | PC3                    | ,449 | 32,896 | ,004                                  | 276356,352  |
|                        | PC4                    | ,774 | ,463   | ,002                                  | 88,017      |
|                        | PC5                    | ,759 | 2,123  | ,017                                  | 259,945     |
|                        | Konstante              | ,000 | 5,170  |                                       |             |

a. In Schritt 1 eingegebene Variablen: v1\_sex, v1\_ageBL \* v1\_sex, v1\_cur\_psy\_trm\_dich, PC1, PC2, PC3, PC4, PC5.

## Block 2: Methode = Einschluß

### Omnibus-Tests der Modellkoeffizienten

|           |         | Chi-Quadrat | df | Sig. |
|-----------|---------|-------------|----|------|
| Schritt 1 | Schritt | 6,103       | 1  | ,013 |
|           | Block   | 6,103       | 1  | ,013 |
|           | Modell  | 64,817      | 9  | ,000 |

### Modellzusammenfassung

| Schritt | -2 Log-Likelihood    | Cox & Snell R-Quadrat | Nagelkerkes R-Quadrat |
|---------|----------------------|-----------------------|-----------------------|
| 1       | 662,823 <sup>a</sup> | ,100                  | ,144                  |

a. Schätzung beendet bei Iteration Nummer 6, weil die Parameterschätzer sich um weniger als ,001 änderten.

### Klassifizierungstabelle<sup>a</sup>

|           |                   | Vorhergesagt           |        | Prozentsatz der Richtigen |
|-----------|-------------------|------------------------|--------|---------------------------|
|           |                   | follow_up_dich<br>DROP | FOLLOW |                           |
| Schritt 1 | Beobachtet        |                        |        |                           |
|           | follow_up_dich    | DROP                   | FOLLOW |                           |
|           |                   |                        |        |                           |
|           | DROP              | 23                     | 149    | 13,4                      |
|           | FOLLOW            | 21                     | 420    | 95,2                      |
|           | Gesamtprozentsatz |                        |        | 72,3                      |

a. Der Trennwert lautet ,500

### Variablen in der Gleichung

|                        |                          | Regressionsko<br>effizientB | Standardfehler | Wald   | df |
|------------------------|--------------------------|-----------------------------|----------------|--------|----|
| Schritt 1 <sup>a</sup> | v1_sex(1)                | -1,859                      | ,574           | 10,501 | 1  |
|                        | v1_ageBL by v1_sex(1)    | ,040                        | ,012           | 10,406 | 1  |
|                        | v1_cur_psy_trm_dich(1)   | -1,248                      | ,197           | 40,118 | 1  |
|                        | PC1                      | -,072                       | 3,189          | ,001   | 1  |
|                        | PC2                      | 1,300                       | 4,121          | ,100   | 1  |
|                        | PC3                      | 3,864                       | 4,844          | ,636   | 1  |
|                        | PC4                      | -,269                       | 2,677          | ,010   | 1  |
|                        | PC5                      | -,235                       | 2,497          | ,009   | 1  |
|                        | z-Faktorwert(PRS_0.0001) | -,242                       | ,099           | 5,987  | 1  |
|                        | Konstante                | 1,678                       | ,181           | 85,851 | 1  |

### Variablen in der Gleichung

|                        |                          | Sig. | Exp(B) | 95% Konfidenzintervall für EXP<br>(B) |             |
|------------------------|--------------------------|------|--------|---------------------------------------|-------------|
|                        |                          |      |        | Unterer Wert                          | Oberer Wert |
| Schritt 1 <sup>a</sup> | v1_sex(1)                | ,001 | ,156   | ,051                                  | ,480        |
|                        | v1_ageBL by v1_sex(1)    | ,001 | 1,041  | 1,016                                 | 1,066       |
|                        | v1_cur_psy_trm_dich(1)   | ,000 | ,287   | ,195                                  | ,423        |
|                        | PC1                      | ,982 | ,931   | ,002                                  | 482,602     |
|                        | PC2                      | ,752 | 3,670  | ,001                                  | 11819,182   |
|                        | PC3                      | ,425 | 47,668 | ,004                                  | 632887,649  |
|                        | PC4                      | ,920 | ,764   | ,004                                  | 145,246     |
|                        | PC5                      | ,925 | ,791   | ,006                                  | 105,612     |
|                        | z-Faktorwert(PRS_0.0001) | ,014 | ,785   | ,646                                  | ,953        |
|                        | Konstante                | ,000 | 5,355  |                                       |             |

a. In Schritt 1 eingegebene Variablen: z-Faktorwert(PRS\_0.0001).

```
LOGISTIC REGRESSION VARIABLES follow_up_dich
/METHOD=ENTER v1_sex v1_ageBL*v1_sex v1_cur_psy_trm_dich PC1 PC2 PC3 PC4
PC5
/METHOD=ENTER ZPRS_0.001
/CONTRAST (v1_sex)=Indicator
/CONTRAST (v1_sex)=Indicator
/CONTRAST (v1_cur_psy_trm_dich)=Indicator
/PRINT=CI(95)
/CRITERIA=PIN(0.05) POUT(0.10) ITERATE(20) CUT(0.5).
```



# Logistische Regression

## Warnungen

Kontrast für diese kategoriale Variable bereits angegeben. Der letzte Kontrast wird verwendet.

## Zusammenfassung der Fallverarbeitung

| Ungewichtete Fälle <sup>a</sup> |                       | N   | Prozent |
|---------------------------------|-----------------------|-----|---------|
| Ausgewählte Fälle               | Einbezogen in Analyse | 613 | 99,4    |
|                                 | Fehlende Fälle        | 4   | ,6      |
|                                 | Gesamt                | 617 | 100,0   |
| Nicht ausgewählte Fälle         |                       | 0   | ,0      |
| Gesamt                          |                       | 617 | 100,0   |

a. Wenn die Gewichtung wirksam ist, finden Sie die Gesamtzahl der Fälle in der Klassifizierungstabelle.

## Codierung abhängiger Variablen

| Ursprünglicher Wert | Interner Wert |
|---------------------|---------------|
| DROP                | 0             |
| FOLLOW              | 1             |

## Codierungen kategorialer Variablen

|                     |      | Häufigkeit | Parametercodierung<br>(1) |
|---------------------|------|------------|---------------------------|
| v1_cur_psy_trm_dich | HOSP | 292        | 1,000                     |
|                     | OUT  | 321        | ,000                      |
| v1_sex              | F    | 277        | 1,000                     |
|                     | M    | 336        | ,000                      |

## Block 0: Anfangsblock

### Klassifizierungstabelle<sup>a,b</sup>

|            |                   |        | Vorhergesagt           |        | Prozentsatz der<br>Richtigen |
|------------|-------------------|--------|------------------------|--------|------------------------------|
| Beobachtet |                   |        | follow_up_dich<br>DROP | FOLLOW |                              |
| Schritt 0  | follow_up_dich    | DROP   | 0                      | 172    | ,0                           |
|            |                   | FOLLOW | 0                      | 441    | 100,0                        |
|            | Gesamtprozentsatz |        |                        |        | 71,9                         |

a. Konstante in das Modell einbezogen.

b. Der Trennwert lautet ,500

### Variablen in der Gleichung

|           |           | Regressionsko<br>effizientB | Standardfehler | Wald    | df | Sig. | Exp(B) |
|-----------|-----------|-----------------------------|----------------|---------|----|------|--------|
| Schritt 0 | Konstante | ,942                        | ,090           | 109,697 | 1  | ,000 | 2,564  |

### Variablen nicht in der Gleichung

|           |           |                        | Wert   | df | Sig. |
|-----------|-----------|------------------------|--------|----|------|
| Schritt 0 | Variablen | v1_sex(1)              | ,017   | 1  | ,896 |
|           |           | v1_ageBL by v1_sex(1)  | 1,785  | 1  | ,182 |
|           |           | v1_cur_psy_trm_dich(1) | 44,518 | 1  | ,000 |
|           |           | PC1                    | ,127   | 1  | ,722 |
|           |           | PC2                    | ,114   | 1  | ,736 |
|           |           | PC3                    | 1,074  | 1  | ,300 |
|           |           | PC4                    | ,093   | 1  | ,760 |
|           |           | PC5                    | 2,643  | 1  | ,104 |
|           |           | Gesamtstatistik        | 56,690 | 8  | ,000 |

## Block 1: Methode = Einschluß

### Omnibus-Tests der Modellkoeffizienten

|           |         | Chi-Quadrat | df | Sig. |
|-----------|---------|-------------|----|------|
| Schritt 1 | Schritt | 58,714      | 8  | ,000 |
|           | Block   | 58,714      | 8  | ,000 |
|           | Modell  | 58,714      | 8  | ,000 |

## Modellzusammenfassung

| Schritt | -2 Log-Likelihood    | Cox & Snell R-Quadrat | Nagelkerkes R-Quadrat |
|---------|----------------------|-----------------------|-----------------------|
| 1       | 668,926 <sup>a</sup> | ,091                  | ,131                  |

a. Schätzung beendet bei Iteration Nummer 6, weil die Parameterschätzer sich um weniger als ,001 änderten.

## Klassifizierungstabelle<sup>a</sup>

| Beobachtet        |                | Vorhergesagt           |        | Prozentsatz der Richtigen |
|-------------------|----------------|------------------------|--------|---------------------------|
|                   |                | follow_up_dich<br>DROP | FOLLOW |                           |
| Schritt 1         | follow_up_dich |                        |        |                           |
|                   | DROP           | 20                     | 152    | 11,6                      |
|                   | FOLLOW         | 16                     | 425    | 96,4                      |
| Gesamtprozentsatz |                |                        |        | 72,6                      |

a. Der Trennwert lautet ,500

## Variablen in der Gleichung

|                        |                        | Regressionsko<br>effizientB | Standardfehler | Wald   | df |
|------------------------|------------------------|-----------------------------|----------------|--------|----|
| Schritt 1 <sup>a</sup> | v1_sex(1)              | -1,837                      | ,574           | 10,224 | 1  |
|                        | v1_ageBL by v1_sex(1)  | ,040                        | ,012           | 10,486 | 1  |
|                        | v1_cur_psy_trm_dich(1) | -1,233                      | ,196           | 39,741 | 1  |
|                        | PC1                    | ,411                        | 3,037          | ,018   | 1  |
|                        | PC2                    | 1,532                       | 3,959          | ,150   | 1  |
|                        | PC3                    | 3,493                       | 4,610          | ,574   | 1  |
|                        | PC4                    | -,769                       | 2,677          | ,083   | 1  |
|                        | PC5                    | ,753                        | 2,453          | ,094   | 1  |
|                        | Konstante              | 1,643                       | ,178           | 84,933 | 1  |

### Variablen in der Gleichung

|                        |                        |      |        | 95% Konfidenzintervall für EXP<br>(B) |             |
|------------------------|------------------------|------|--------|---------------------------------------|-------------|
|                        |                        | Sig. | Exp(B) | Unterer Wert                          | Oberer Wert |
| Schritt 1 <sup>a</sup> | v1_sex(1)              | ,001 | ,159   | ,052                                  | ,491        |
|                        | v1_ageBL by v1_sex(1)  | ,001 | 1,041  | 1,016                                 | 1,067       |
|                        | v1_cur_psy_trm_dich(1) | ,000 | ,291   | ,199                                  | ,428        |
|                        | PC1                    | ,892 | 1,508  | ,004                                  | 579,835     |
|                        | PC2                    | ,699 | 4,626  | ,002                                  | 10845,660   |
|                        | PC3                    | ,449 | 32,896 | ,004                                  | 276356,352  |
|                        | PC4                    | ,774 | ,463   | ,002                                  | 88,017      |
|                        | PC5                    | ,759 | 2,123  | ,017                                  | 259,945     |
|                        | Konstante              | ,000 | 5,170  |                                       |             |

a. In Schritt 1 eingegebene Variablen: v1\_sex, v1\_ageBL \* v1\_sex, v1\_cur\_psy\_trm\_dich, PC1, PC2, PC3, PC4, PC5.

## Block 2: Methode = Einschluß

### Omnibus-Tests der Modellkoeffizienten

|           |         | Chi-Quadrat | df | Sig. |
|-----------|---------|-------------|----|------|
| Schritt 1 | Schritt | 5,997       | 1  | ,014 |
|           | Block   | 5,997       | 1  | ,014 |
|           | Modell  | 64,711      | 9  | ,000 |

### Modellzusammenfassung

| Schritt | -2 Log-Likelihood    | Cox & Snell R-Quadrat | Nagelkerkes R-Quadrat |
|---------|----------------------|-----------------------|-----------------------|
| 1       | 662,929 <sup>a</sup> | ,100                  | ,144                  |

a. Schätzung beendet bei Iteration Nummer 6, weil die Parameterschätzer sich um weniger als ,001 änderten.

### Klassifizierungstabelle<sup>a</sup>

|                   |                | Vorhergesagt           |        | Prozentsatz der Richtigen |
|-------------------|----------------|------------------------|--------|---------------------------|
|                   |                | follow_up_dich<br>DROP | FOLLOW |                           |
| Schritt 1         | follow_up_dich |                        |        |                           |
|                   | DROP           | 21                     | 151    | 12,2                      |
|                   | FOLLOW         | 20                     | 421    | 95,5                      |
| Gesamtprozentsatz |                |                        |        | 72,1                      |

a. Der Trennwert lautet ,500

### Variablen in der Gleichung

|                        |                         | Regressionsko<br>effizientB | Standardfehler | Wald   | df |
|------------------------|-------------------------|-----------------------------|----------------|--------|----|
| Schritt 1 <sup>a</sup> | v1_sex(1)               | -1,790                      | ,576           | 9,659  | 1  |
|                        | v1_ageBL by v1_sex(1)   | ,038                        | ,012           | 9,379  | 1  |
|                        | v1_cur_psy_trm_dich(1)  | -1,241                      | ,197           | 39,808 | 1  |
|                        | PC1                     | ,033                        | 3,131          | ,000   | 1  |
|                        | PC2                     | ,789                        | 4,133          | ,036   | 1  |
|                        | PC3                     | 4,165                       | 4,855          | ,736   | 1  |
|                        | PC4                     | -,474                       | 2,662          | ,032   | 1  |
|                        | PC5                     | -,304                       | 2,503          | ,015   | 1  |
|                        | z-Faktorwert(PRS_0.001) | -,244                       | ,100           | 5,892  | 1  |
|                        | Konstante               | 1,681                       | ,181           | 86,336 | 1  |

### Variablen in der Gleichung

|                        |                         | Sig. | Exp(B) | 95% Konfidenzintervall für EXP<br>(B) |             |
|------------------------|-------------------------|------|--------|---------------------------------------|-------------|
|                        |                         |      |        | Unterer Wert                          | Oberer Wert |
| Schritt 1 <sup>a</sup> | v1_sex(1)               | ,002 | ,167   | ,054                                  | ,516        |
|                        | v1_ageBL by v1_sex(1)   | ,002 | 1,039  | 1,014                                 | 1,065       |
|                        | v1_cur_psy_trm_dich(1)  | ,000 | ,289   | ,197                                  | ,425        |
|                        | PC1                     | ,992 | 1,034  | ,002                                  | 478,066     |
|                        | PC2                     | ,849 | 2,202  | ,001                                  | 7264,466    |
|                        | PC3                     | ,391 | 64,395 | ,005                                  | 874529,906  |
|                        | PC4                     | ,859 | ,622   | ,003                                  | 114,732     |
|                        | PC5                     | ,903 | ,738   | ,005                                  | 99,708      |
|                        | z-Faktorwert(PRS_0.001) | ,015 | ,784   | ,643                                  | ,954        |
|                        | Konstante               | ,000 | 5,369  |                                       |             |

a. In Schritt 1 eingegebene Variablen: z-Faktorwert(PRS\_0.001).

```
LOGISTIC REGRESSION VARIABLES follow_up_dich
/METHOD=ENTER v1_sex v1_ageBL*v1_sex v1_cur_psy_trm_dich PC1 PC2 PC3 PC4
PC5
/METHOD=ENTER ZPRS_0.01
/CONTRAST (v1_sex)=Indicator
/CONTRAST (v1_sex)=Indicator
/CONTRAST (v1_cur_psy_trm_dich)=Indicator
/PRINT=CI(95)
/CRITERIA=PIN(0.05) POUT(0.10) ITERATE(20) CUT(0.5).
```

## Logistische Regression

## Warnungen

Kontrast für diese kategoriale Variable bereits angegeben. Der letzte Kontrast wird verwendet.

## Zusammenfassung der Fallverarbeitung

| Ungewichtete Fälle <sup>a</sup> |                       | N   | Prozent |
|---------------------------------|-----------------------|-----|---------|
| Ausgewählte Fälle               | Einbezogen in Analyse | 613 | 99,4    |
|                                 | Fehlende Fälle        | 4   | ,6      |
|                                 | Gesamt                | 617 | 100,0   |
| Nicht ausgewählte Fälle         |                       | 0   | ,0      |
| Gesamt                          |                       | 617 | 100,0   |

a. Wenn die Gewichtung wirksam ist, finden Sie die Gesamtzahl der Fälle in der Klassifizierungstabelle.

## Codierung abhängiger Variablen

| Ursprünglicher Wert | Interner Wert |
|---------------------|---------------|
| DROP                | 0             |
| FOLLOW              | 1             |

## Codierungen kategorialer Variablen

|                     |      |            | Parametercodierung<br>(1) |
|---------------------|------|------------|---------------------------|
|                     |      | Häufigkeit |                           |
| v1_cur_psy_trm_dich | HOSP | 292        | 1,000                     |
|                     | OUT  | 321        | ,000                      |
| v1_sex              | F    | 277        | 1,000                     |
|                     | M    | 336        | ,000                      |

## Block 0: Anfangsblock

### Klassifizierungstabelle<sup>a,b</sup>

|           |                   |            | Vorhergesagt           |        | Prozentsatz der<br>Richtigen |
|-----------|-------------------|------------|------------------------|--------|------------------------------|
|           |                   | Beobachtet | follow_up_dich<br>DROP | FOLLOW |                              |
| Schritt 0 | follow_up_dich    | DROP       | 0                      | 172    | ,0                           |
|           |                   | FOLLOW     | 0                      | 441    | 100,0                        |
|           | Gesamtprozentsatz |            |                        |        | 71,9                         |

a. Konstante in das Modell einbezogen.

b. Der Trennwert lautet ,500

### Variablen in der Gleichung

|           |           | Regressionsko-<br>effizientB | Standardfehler | Wald    | df | Sig. | Exp(B) |
|-----------|-----------|------------------------------|----------------|---------|----|------|--------|
| Schritt 0 | Konstante | ,942                         | ,090           | 109,697 | 1  | ,000 | 2,564  |

### Variablen nicht in der Gleichung

|           |                 |                        | Wert   | df | Sig. |
|-----------|-----------------|------------------------|--------|----|------|
| Schritt 0 | Variablen       | v1_sex(1)              | ,017   | 1  | ,896 |
|           |                 | v1_ageBL by v1_sex(1)  | 1,785  | 1  | ,182 |
|           |                 | v1_cur_psy_trm_dich(1) | 44,518 | 1  | ,000 |
|           |                 | PC1                    | ,127   | 1  | ,722 |
|           |                 | PC2                    | ,114   | 1  | ,736 |
|           |                 | PC3                    | 1,074  | 1  | ,300 |
|           |                 | PC4                    | ,093   | 1  | ,760 |
|           |                 | PC5                    | 2,643  | 1  | ,104 |
|           | Gesamtstatistik |                        | 56,690 | 8  | ,000 |

## Block 1: Methode = Einschluß

### Omnibus-Tests der Modellkoeffizienten

|           |         | Chi-Quadrat | df | Sig. |
|-----------|---------|-------------|----|------|
| Schritt 1 | Schritt | 58,714      | 8  | ,000 |
|           | Block   | 58,714      | 8  | ,000 |
|           | Modell  | 58,714      | 8  | ,000 |

### Modellzusammenfassung

| Schritt | -2 Log-<br>Likelihood | Cox & Snell R-<br>Quadrat | Nagelkerkes R-<br>Quadrat |
|---------|-----------------------|---------------------------|---------------------------|
| 1       | 668,926 <sup>a</sup>  | ,091                      | ,131                      |

a. Schätzung beendet bei Iteration Nummer 6, weil die Parameterschätzer sich um weniger als ,001 änderten.

## Klassifizierungstabelle<sup>a</sup>

|           |                   |        | Vorhergesagt           |        | Prozentsatz der<br>Richtigen |
|-----------|-------------------|--------|------------------------|--------|------------------------------|
|           |                   |        | follow_up_dich<br>DROP | FOLLOW |                              |
| Schritt 1 | follow_up_dich    | DROP   | 20                     | 152    | 11,6                         |
|           |                   | FOLLOW | 16                     | 425    | 96,4                         |
|           | Gesamtprozentsatz |        |                        |        | 72,6                         |

a. Der Trennwert lautet ,500

## Variablen in der Gleichung

|                        |                        | Regressionsko<br>effizientB | Standardfehler | Wald   | df |
|------------------------|------------------------|-----------------------------|----------------|--------|----|
| Schritt 1 <sup>a</sup> | v1_sex(1)              | -1,837                      | ,574           | 10,224 | 1  |
|                        | v1_ageBL by v1_sex(1)  | ,040                        | ,012           | 10,486 | 1  |
|                        | v1_cur_psy_trm_dich(1) | -1,233                      | ,196           | 39,741 | 1  |
|                        | PC1                    | ,411                        | 3,037          | ,018   | 1  |
|                        | PC2                    | 1,532                       | 3,959          | ,150   | 1  |
|                        | PC3                    | 3,493                       | 4,610          | ,574   | 1  |
|                        | PC4                    | -,769                       | 2,677          | ,083   | 1  |
|                        | PC5                    | ,753                        | 2,453          | ,094   | 1  |
|                        | Konstante              | 1,643                       | ,178           | 84,933 | 1  |

## Variablen in der Gleichung

|                        |                        | Sig. | Exp(B) | 95% Konfidenzintervall für EXP<br>(B) |             |
|------------------------|------------------------|------|--------|---------------------------------------|-------------|
|                        |                        |      |        | Unterer Wert                          | Oberer Wert |
| Schritt 1 <sup>a</sup> | v1_sex(1)              | ,001 | ,159   | ,052                                  | ,491        |
|                        | v1_ageBL by v1_sex(1)  | ,001 | 1,041  | 1,016                                 | 1,067       |
|                        | v1_cur_psy_trm_dich(1) | ,000 | ,291   | ,199                                  | ,428        |
|                        | PC1                    | ,892 | 1,508  | ,004                                  | 579,835     |
|                        | PC2                    | ,699 | 4,626  | ,002                                  | 10845,660   |
|                        | PC3                    | ,449 | 32,896 | ,004                                  | 276356,352  |
|                        | PC4                    | ,774 | ,463   | ,002                                  | 88,017      |
|                        | PC5                    | ,759 | 2,123  | ,017                                  | 259,945     |
|                        | Konstante              | ,000 | 5,170  |                                       |             |

a. In Schritt 1 eingegebene Variablen: v1\_sex, v1\_ageBL \* v1\_sex, v1\_cur\_psy\_trm\_dich, PC1, PC2, PC3, PC4, PC5.

## Block 2: Methode = Einschluß



### Omnibus-Tests der Modellkoeffizienten

|           |         | Chi-Quadrat | df | Sig. |
|-----------|---------|-------------|----|------|
| Schritt 1 | Schritt | 3,812       | 1  | ,051 |
|           | Block   | 3,812       | 1  | ,051 |
|           | Modell  | 62,525      | 9  | ,000 |

### Modellzusammenfassung

| Schritt | -2 Log-Likelihood    | Cox & Snell R-Quadrat | Nagelkerkes R-Quadrat |
|---------|----------------------|-----------------------|-----------------------|
| 1       | 665,114 <sup>a</sup> | ,097                  | ,140                  |

a. Schätzung beendet bei Iteration Nummer 6, weil die Parameterschätzer sich um weniger als ,001 änderten.

### Klassifizierungstabelle<sup>a</sup>

|           |                   | Vorhergesagt           |                          | Prozentsatz der Richtigen |
|-----------|-------------------|------------------------|--------------------------|---------------------------|
|           |                   | follow_up_dich<br>DROP | follow_up_dich<br>FOLLOW |                           |
| Schritt 1 | Beobachtet        |                        |                          |                           |
|           | follow_up_dich    | DROP                   | FOLLOW                   |                           |
|           |                   |                        |                          |                           |
|           |                   | 21                     | 151                      | 12,2                      |
|           |                   | 20                     | 421                      | 95,5                      |
|           | Gesamtprozentsatz |                        |                          | 72,1                      |

a. Der Trennwert lautet ,500

### Variablen in der Gleichung

|                        |                        | Regressionsko<br>effizientB | Standardfehler | Wald   | df |
|------------------------|------------------------|-----------------------------|----------------|--------|----|
| Schritt 1 <sup>a</sup> | v1_sex(1)              | -1,815                      | ,574           | 9,982  | 1  |
|                        | v1_ageBL by v1_sex(1)  | ,039                        | ,012           | 9,917  | 1  |
|                        | v1_cur_psy_trm_dich(1) | -1,240                      | ,196           | 39,916 | 1  |
|                        | PC1                    | ,125                        | 3,085          | ,002   | 1  |
|                        | PC2                    | ,849                        | 4,035          | ,044   | 1  |
|                        | PC3                    | 3,811                       | 4,681          | ,663   | 1  |
|                        | PC4                    | -,476                       | 2,705          | ,031   | 1  |
|                        | PC5                    | -,320                       | 2,519          | ,016   | 1  |
|                        | z-Faktorwert(PRS_0.01) | -,192                       | ,099           | 3,766  | 1  |
|                        | Konstante              | 1,666                       | ,180           | 85,913 | 1  |

### Variablen in der Gleichung

|                        |                        |      |        | 95% Konfidenzintervall für EXP (B) |             |
|------------------------|------------------------|------|--------|------------------------------------|-------------|
|                        |                        | Sig. | Exp(B) | Unterer Wert                       | Oberer Wert |
| Schritt 1 <sup>a</sup> | v1_sex(1)              | ,002 | ,163   | ,053                               | ,502        |
|                        | v1_ageBL by v1_sex(1)  | ,002 | 1,040  | 1,015                              | 1,066       |
|                        | v1_cur_psy_trm_dich(1) | ,000 | ,289   | ,197                               | ,425        |
|                        | PC1                    | ,968 | 1,133  | ,003                               | 479,286     |
|                        | PC2                    | ,833 | 2,338  | ,001                               | 6357,673    |
|                        | PC3                    | ,416 | 45,215 | ,005                               | 436367,282  |
|                        | PC4                    | ,860 | ,621   | ,003                               | 124,555     |
|                        | PC5                    | ,899 | ,726   | ,005                               | 101,201     |
|                        | z-Faktorwert(PRS_0.01) | ,052 | ,825   | ,680                               | 1,002       |
|                        | Konstante              | ,000 | 5,291  |                                    |             |

a. In Schritt 1 eingegebene Variablen: z-Faktorwert(PRS\_0.01).

```
LOGISTIC REGRESSION VARIABLES follow_up_dich
  /METHOD=ENTER v1_sex v1_ageBL*v1_sex v1_cur_psy_trm_dich PC1 PC2 PC3 PC4
PC5
  /METHOD=ENTER ZPRS_0.05
  /CONTRAST (v1_sex)=Indicator
  /CONTRAST (v1_sex)=Indicator
  /CONTRAST (v1_cur_psy_trm_dich)=Indicator
  /PRINT=CI(95)
  /CRITERIA=PIN(0.05) POUT(0.10) ITERATE(20) CUT(0.5).
```

## Logistische Regression

### Warnungen

Kontrast für diese kategoriale Variable bereits angegeben. Der letzte Kontrast wird verwendet.

### Zusammenfassung der Fallverarbeitung

| Ungewichtete Fälle <sup>a</sup> |                       | N   | Prozent |
|---------------------------------|-----------------------|-----|---------|
| Ausgewählte Fälle               | Einbezogen in Analyse | 613 | 99,4    |
|                                 | Fehlende Fälle        | 4   | ,6      |
|                                 | Gesamt                | 617 | 100,0   |
| Nicht ausgewählte Fälle         |                       | 0   | ,0      |
| Gesamt                          |                       | 617 | 100,0   |

a. Wenn die Gewichtung wirksam ist, finden Sie die Gesamtzahl der Fälle in der Klassifizierungstabelle.

### Codierung abhängiger Variablen

| Ursprünglicher Wert | Interner Wert |
|---------------------|---------------|
| DROP                | 0             |
| FOLLOW              | 1             |

### Codierungen kategorialer Variablen

|                     |      | Häufigkeit | Parametercodierung<br>(1) |
|---------------------|------|------------|---------------------------|
| v1_cur_psy_trm_dich | HOSP | 292        | 1,000                     |
|                     | OUT  | 321        | ,000                      |
| v1_sex              | F    | 277        | 1,000                     |
|                     | M    | 336        | ,000                      |

### Block 0: Anfangsblock

#### Klassifizierungstabelle<sup>a,b</sup>

| Beobachtet |                   |        | Vorhergesagt           |        | Prozentsatz der<br>Richtigen |
|------------|-------------------|--------|------------------------|--------|------------------------------|
|            |                   |        | follow_up_dich<br>DROP | FOLLOW |                              |
| Schritt 0  | follow_up_dich    | DROP   | 0                      | 172    | ,0                           |
|            |                   | FOLLOW | 0                      | 441    | 100,0                        |
|            | Gesamtprozentsatz |        |                        |        | 71,9                         |

a. Konstante in das Modell einbezogen.

b. Der Trennwert lautet ,500

### Variablen in der Gleichung

|                     | Regressionsko<br>effizientB | Standardfehler | Wald    | df | Sig. | Exp(B) |
|---------------------|-----------------------------|----------------|---------|----|------|--------|
| Schritt 0 Konstante | ,942                        | ,090           | 109,697 | 1  | ,000 | 2,564  |

### Variablen nicht in der Gleichung

|           |                 |                        | Wert   | df | Sig. |
|-----------|-----------------|------------------------|--------|----|------|
| Schritt 0 | Variablen       | v1_sex(1)              | ,017   | 1  | ,896 |
|           |                 | v1_ageBL by v1_sex(1)  | 1,785  | 1  | ,182 |
|           |                 | v1_cur_psy_trm_dich(1) | 44,518 | 1  | ,000 |
|           |                 | PC1                    | ,127   | 1  | ,722 |
|           |                 | PC2                    | ,114   | 1  | ,736 |
|           |                 | PC3                    | 1,074  | 1  | ,300 |
|           |                 | PC4                    | ,093   | 1  | ,760 |
|           |                 | PC5                    | 2,643  | 1  | ,104 |
|           | Gesamtstatistik |                        | 56,690 | 8  | ,000 |

### Block 1: Methode = Einschluß

#### Omnibus-Tests der Modellkoeffizienten

|           |         | Chi-Quadrat | df | Sig. |
|-----------|---------|-------------|----|------|
| Schritt 1 | Schritt | 58,714      | 8  | ,000 |
|           | Block   | 58,714      | 8  | ,000 |
|           | Modell  | 58,714      | 8  | ,000 |

#### Modellzusammenfassung

| Schritt | -2 Log-Likelihood    | Cox & Snell R-Quadrat | Nagelkerkes R-Quadrat |
|---------|----------------------|-----------------------|-----------------------|
| 1       | 668,926 <sup>a</sup> | ,091                  | ,131                  |

a. Schätzung beendet bei Iteration Nummer 6, weil die Parameterschätzer sich um weniger als ,001 änderten.

### Klassifizierungstabelle<sup>a</sup>

|           |                   | Vorhergesagt           |        | Prozentsatz der Richtigen |
|-----------|-------------------|------------------------|--------|---------------------------|
|           |                   | follow_up_dich<br>DROP | FOLLOW |                           |
| Schritt 1 | Beobachtet        |                        |        |                           |
|           | follow_up_dich    |                        |        |                           |
|           | DROP              | 20                     | 152    | 11,6                      |
|           | FOLLOW            | 16                     | 425    | 96,4                      |
|           | Gesamtprozentsatz |                        |        | 72,6                      |

a. Der Trennwert lautet ,500

### Variablen in der Gleichung

|                        |                        | Regressionsko<br>effizientB | Standardfehler | Wald   | df |
|------------------------|------------------------|-----------------------------|----------------|--------|----|
| Schritt 1 <sup>a</sup> | v1_sex(1)              | -1,837                      | ,574           | 10,224 | 1  |
|                        | v1_ageBL by v1_sex(1)  | ,040                        | ,012           | 10,486 | 1  |
|                        | v1_cur_psy_trm_dich(1) | -1,233                      | ,196           | 39,741 | 1  |
|                        | PC1                    | ,411                        | 3,037          | ,018   | 1  |
|                        | PC2                    | 1,532                       | 3,959          | ,150   | 1  |
|                        | PC3                    | 3,493                       | 4,610          | ,574   | 1  |
|                        | PC4                    | -,769                       | 2,677          | ,083   | 1  |
|                        | PC5                    | ,753                        | 2,453          | ,094   | 1  |
|                        | Konstante              | 1,643                       | ,178           | 84,933 | 1  |

### Variablen in der Gleichung

|                        |                        | Sig. | Exp(B) | 95% Konfidenzintervall für EXP<br>(B) |             |
|------------------------|------------------------|------|--------|---------------------------------------|-------------|
|                        |                        |      |        | Unterer Wert                          | Oberer Wert |
| Schritt 1 <sup>a</sup> | v1_sex(1)              | ,001 | ,159   | ,052                                  | ,491        |
|                        | v1_ageBL by v1_sex(1)  | ,001 | 1,041  | 1,016                                 | 1,067       |
|                        | v1_cur_psy_trm_dich(1) | ,000 | ,291   | ,199                                  | ,428        |
|                        | PC1                    | ,892 | 1,508  | ,004                                  | 579,835     |
|                        | PC2                    | ,699 | 4,626  | ,002                                  | 10845,660   |
|                        | PC3                    | ,449 | 32,896 | ,004                                  | 276356,352  |
|                        | PC4                    | ,774 | ,463   | ,002                                  | 88,017      |
|                        | PC5                    | ,759 | 2,123  | ,017                                  | 259,945     |
|                        | Konstante              | ,000 | 5,170  |                                       |             |

a. In Schritt 1 eingegebene Variablen: v1\_sex, v1\_ageBL \* v1\_sex, v1\_cur\_psy\_trm\_dich, PC1, PC2, PC3, PC4, PC5.

## Block 2: Methode = Einschluß

### Omnibus-Tests der Modellkoeffizienten

|           |         | Chi-Quadrat | df | Sig. |
|-----------|---------|-------------|----|------|
| Schritt 1 | Schritt | 3,253       | 1  | ,071 |
|           | Block   | 3,253       | 1  | ,071 |
|           | Modell  | 61,967      | 9  | ,000 |

## Modellzusammenfassung

| Schritt | -2 Log-Likelihood    | Cox & Snell R-Quadrat | Nagelkerkes R-Quadrat |
|---------|----------------------|-----------------------|-----------------------|
| 1       | 665,673 <sup>a</sup> | ,096                  | ,138                  |

a. Schätzung beendet bei Iteration Nummer 6, weil die Parameterschätzer sich um weniger als ,001 änderten.

## Klassifizierungstabelle<sup>a</sup>

| Beobachtet        |                | Vorhergesagt           |        | Prozentsatz der Richtigen |
|-------------------|----------------|------------------------|--------|---------------------------|
|                   |                | follow_up_dich<br>DROP | FOLLOW |                           |
| Schritt 1         | follow_up_dich |                        |        |                           |
|                   | DROP           | 19                     | 153    | 11,0                      |
|                   | FOLLOW         | 17                     | 424    | 96,1                      |
| Gesamtprozentsatz |                |                        |        | 72,3                      |

a. Der Trennwert lautet ,500

## Variablen in der Gleichung

|                        |                        | Regressionsko<br>effizientB | Standardfehler | Wald   | df |
|------------------------|------------------------|-----------------------------|----------------|--------|----|
| Schritt 1 <sup>a</sup> | v1_sex(1)              | -1,824                      | ,574           | 10,104 | 1  |
|                        | v1_ageBL by v1_sex(1)  | ,040                        | ,012           | 10,192 | 1  |
|                        | v1_cur_psy_trm_dich(1) | -1,224                      | ,196           | 38,992 | 1  |
|                        | PC1                    | ,063                        | 3,092          | ,000   | 1  |
|                        | PC2                    | ,860                        | 3,962          | ,047   | 1  |
|                        | PC3                    | 3,632                       | 4,569          | ,632   | 1  |
|                        | PC4                    | -,551                       | 2,703          | ,042   | 1  |
|                        | PC5                    | -,342                       | 2,531          | ,018   | 1  |
|                        | z-Faktorwert(PRS_0.05) | -,179                       | ,100           | 3,216  | 1  |
|                        | Konstante              | 1,652                       | ,179           | 85,082 | 1  |

### Variablen in der Gleichung

|                        |                        |      |        | 95% Konfidenzintervall für EXP (B) |             |
|------------------------|------------------------|------|--------|------------------------------------|-------------|
|                        |                        | Sig. | Exp(B) | Unterer Wert                       | Oberer Wert |
| Schritt 1 <sup>a</sup> | v1_sex(1)              | ,001 | ,161   | ,052                               | ,497        |
|                        | v1_ageBL by v1_sex(1)  | ,001 | 1,040  | 1,015                              | 1,066       |
|                        | v1_cur_psy_trm_dich(1) | ,000 | ,294   | ,200                               | ,432        |
|                        | PC1                    | ,984 | 1,065  | ,002                               | 456,399     |
|                        | PC2                    | ,828 | 2,363  | ,001                               | 5565,149    |
|                        | PC3                    | ,427 | 37,783 | ,005                               | 292800,754  |
|                        | PC4                    | ,838 | ,576   | ,003                               | 115,259     |
|                        | PC5                    | ,892 | ,710   | ,005                               | 101,356     |
|                        | z-Faktorwert(PRS_0.05) | ,073 | ,837   | ,688                               | 1,017       |
|                        | Konstante              | ,000 | 5,217  |                                    |             |

a. In Schritt 1 eingegebene Variablen: z-Faktorwert(PRS\_0.05).

```
LOGISTIC REGRESSION VARIABLES follow_up_dich
  /METHOD=ENTER v1_sex v1_ageBL*v1_sex v1_cur_psy_trm_dich PC1 PC2 PC3 PC4
PC5
  /METHOD=ENTER ZPRS_0.1
  /CONTRAST (v1_sex)=Indicator
  /CONTRAST (v1_sex)=Indicator
  /CONTRAST (v1_cur_psy_trm_dich)=Indicator
  /PRINT=CI(95)
  /CRITERIA=PIN(0.05) POUT(0.10) ITERATE(20) CUT(0.5).
```

## Logistische Regression

### Warnungen

Kontrast für diese kategoriale Variable bereits angegeben. Der letzte Kontrast wird verwendet.

### Zusammenfassung der Fallverarbeitung

| Ungewichtete Fälle <sup>a</sup> |                       | N   | Prozent |
|---------------------------------|-----------------------|-----|---------|
| Ausgewählte Fälle               | Einbezogen in Analyse | 613 | 99,4    |
|                                 | Fehlende Fälle        | 4   | ,6      |
|                                 | Gesamt                | 617 | 100,0   |
| Nicht ausgewählte Fälle         |                       | 0   | ,0      |
| Gesamt                          |                       | 617 | 100,0   |

a. Wenn die Gewichtung wirksam ist, finden Sie die Gesamtzahl der Fälle in der Klassifizierungstabelle.

### Codierung abhängiger Variablen

| Ursprünglicher Wert | Interner Wert |
|---------------------|---------------|
| DROP                | 0             |
| FOLLOW              | 1             |

### Codierungen kategorialer Variablen

| Häufigkeit          |      |     | Parameterkodierung<br>(1) |
|---------------------|------|-----|---------------------------|
| v1_cur_psy_trm_dich | HOSP | 292 | 1,000                     |
|                     | OUT  | 321 | ,000                      |
| v1_sex              | F    | 277 | 1,000                     |
|                     | M    | 336 | ,000                      |

## Block 0: Anfangsblock

### Klassifizierungstabelle<sup>a,b</sup>

|           |                   |        | Vorhergesagt           |        | Prozentsatz der<br>Richtigen |
|-----------|-------------------|--------|------------------------|--------|------------------------------|
|           |                   |        | follow_up_dich<br>DROP | FOLLOW |                              |
| Schritt 0 | follow_up_dich    | DROP   | 0                      | 172    | ,0                           |
|           |                   | FOLLOW | 0                      | 441    | 100,0                        |
|           | Gesamtprozentsatz |        |                        |        | 71,9                         |

a. Konstante in das Modell einbezogen.

b. Der Trennwert lautet ,500

### Variablen in der Gleichung

|           |           | Regressionsko-<br>effizientB | Standardfehler | Wald    | df | Sig. | Exp(B) |
|-----------|-----------|------------------------------|----------------|---------|----|------|--------|
| Schritt 0 | Konstante | ,942                         | ,090           | 109,697 | 1  | ,000 | 2,564  |



### Variablen nicht in der Gleichung

|           |                 |                        | Wert   | df | Sig. |
|-----------|-----------------|------------------------|--------|----|------|
| Schritt 0 | Variablen       | v1_sex(1)              | ,017   | 1  | ,896 |
|           |                 | v1_ageBL by v1_sex(1)  | 1,785  | 1  | ,182 |
|           |                 | v1_cur_psy_trm_dich(1) | 44,518 | 1  | ,000 |
|           |                 | PC1                    | ,127   | 1  | ,722 |
|           |                 | PC2                    | ,114   | 1  | ,736 |
|           |                 | PC3                    | 1,074  | 1  | ,300 |
|           |                 | PC4                    | ,093   | 1  | ,760 |
|           |                 | PC5                    | 2,643  | 1  | ,104 |
|           | Gesamtstatistik |                        | 56,690 | 8  | ,000 |

### Block 1: Methode = Einschluß

#### Omnibus-Tests der Modellkoeffizienten

|           |         | Chi-Quadrat | df | Sig. |
|-----------|---------|-------------|----|------|
| Schritt 1 | Schritt | 58,714      | 8  | ,000 |
|           | Block   | 58,714      | 8  | ,000 |
|           | Modell  | 58,714      | 8  | ,000 |

#### Modellzusammenfassung

| Schritt | -2 Log-Likelihood    | Cox & Snell R-Quadrat | Nagelkerkes R-Quadrat |
|---------|----------------------|-----------------------|-----------------------|
| 1       | 668,926 <sup>a</sup> | ,091                  | ,131                  |

a. Schätzung beendet bei Iteration Nummer 6, weil die Parameterschätzer sich um weniger als ,001 änderten.

### Klassifizierungstabelle<sup>a</sup>

|           |                   | Vorhergesagt           |        | Prozentsatz der Richtigen |
|-----------|-------------------|------------------------|--------|---------------------------|
|           |                   | follow_up_dich<br>DROP | FOLLOW |                           |
| Schritt 1 | follow_up_dich    | DROP                   | 20     | 152                       |
|           |                   | FOLLOW                 | 16     | 425                       |
|           | Gesamtprozentsatz |                        |        |                           |
|           |                   |                        |        | 11,6                      |
|           |                   |                        |        | 96,4                      |
|           |                   |                        |        | 72,6                      |

a. Der Trennwert lautet ,500

### Variablen in der Gleichung

|                        |                        | Regressionsko<br>effizientB | Standardfehler | Wald   | df |
|------------------------|------------------------|-----------------------------|----------------|--------|----|
| Schritt 1 <sup>a</sup> | v1_sex(1)              | -1,837                      | ,574           | 10,224 | 1  |
|                        | v1_ageBL by v1_sex(1)  | ,040                        | ,012           | 10,486 | 1  |
|                        | v1_cur_psy_trm_dich(1) | -1,233                      | ,196           | 39,741 | 1  |
|                        | PC1                    | ,411                        | 3,037          | ,018   | 1  |
|                        | PC2                    | 1,532                       | 3,959          | ,150   | 1  |
|                        | PC3                    | 3,493                       | 4,610          | ,574   | 1  |
|                        | PC4                    | -,769                       | 2,677          | ,083   | 1  |
|                        | PC5                    | ,753                        | 2,453          | ,094   | 1  |
|                        | Konstante              | 1,643                       | ,178           | 84,933 | 1  |

### Variablen in der Gleichung

|                        |                        | Sig. | Exp(B) | 95% Konfidenzintervall für EXP<br>(B) |             |
|------------------------|------------------------|------|--------|---------------------------------------|-------------|
|                        |                        |      |        | Unterer Wert                          | Oberer Wert |
| Schritt 1 <sup>a</sup> | v1_sex(1)              | ,001 | ,159   | ,052                                  | ,491        |
|                        | v1_ageBL by v1_sex(1)  | ,001 | 1,041  | 1,016                                 | 1,067       |
|                        | v1_cur_psy_trm_dich(1) | ,000 | ,291   | ,199                                  | ,428        |
|                        | PC1                    | ,892 | 1,508  | ,004                                  | 579,835     |
|                        | PC2                    | ,699 | 4,626  | ,002                                  | 10845,660   |
|                        | PC3                    | ,449 | 32,896 | ,004                                  | 276356,352  |
|                        | PC4                    | ,774 | ,463   | ,002                                  | 88,017      |
|                        | PC5                    | ,759 | 2,123  | ,017                                  | 259,945     |
|                        | Konstante              | ,000 | 5,170  |                                       |             |

a. In Schritt 1 eingegebene Variablen: v1\_sex, v1\_ageBL \* v1\_sex, v1\_cur\_psy\_trm\_dich, PC1, PC2, PC3, PC4, PC5.

## Block 2: Methode = Einschluß

### Omnibus-Tests der Modellkoeffizienten

|           |         | Chi-Quadrat | df | Sig. |
|-----------|---------|-------------|----|------|
| Schritt 1 | Schritt | 2,705       | 1  | ,100 |
|           | Block   | 2,705       | 1  | ,100 |
|           | Modell  | 61,419      | 9  | ,000 |

## Modellzusammenfassung

| Schritt | -2 Log-Likelihood    | Cox & Snell R-Quadrat | Nagelkerkes R-Quadrat |
|---------|----------------------|-----------------------|-----------------------|
| 1       | 666,221 <sup>a</sup> | ,095                  | ,137                  |

a. Schätzung beendet bei Iteration Nummer 6, weil die Parameterschätzer sich um weniger als ,001 änderten.

## Klassifizierungstabelle<sup>a</sup>

| Beobachtet        |                | Vorhergesagt           |        | Prozentsatz der Richtigen |
|-------------------|----------------|------------------------|--------|---------------------------|
|                   |                | follow_up_dich<br>DROP | FOLLOW |                           |
| Schritt 1         | follow_up_dich |                        |        |                           |
|                   | DROP           | 19                     | 153    | 11,0                      |
|                   | FOLLOW         | 19                     | 422    | 95,7                      |
| Gesamtprozentsatz |                |                        |        | 71,9                      |

a. Der Trennwert lautet ,500

## Variablen in der Gleichung

|                        |                        | Regressionsko<br>effizientB | Standardfehler | Wald   | df |
|------------------------|------------------------|-----------------------------|----------------|--------|----|
| Schritt 1 <sup>a</sup> | v1_sex(1)              | -1,818                      | ,573           | 10,058 | 1  |
|                        | v1_ageBL by v1_sex(1)  | ,040                        | ,012           | 10,182 | 1  |
|                        | v1_cur_psy_trm_dich(1) | -1,231                      | ,196           | 39,445 | 1  |
|                        | PC1                    | ,223                        | 3,082          | ,005   | 1  |
|                        | PC2                    | ,909                        | 3,909          | ,054   | 1  |
|                        | PC3                    | 3,632                       | 4,489          | ,654   | 1  |
|                        | PC4                    | -,658                       | 2,699          | ,059   | 1  |
|                        | PC5                    | -,308                       | 2,538          | ,015   | 1  |
|                        | z-Faktorwert(PRS_0.1)  | -,163                       | ,099           | 2,677  | 1  |
|                        | Konstante              | 1,652                       | ,179           | 85,184 | 1  |

### Variablen in der Gleichung

|                        |                        |      |        | 95% Konfidenzintervall für EXP (B) |             |
|------------------------|------------------------|------|--------|------------------------------------|-------------|
|                        |                        | Sig. | Exp(B) | Unterer Wert                       | Oberer Wert |
| Schritt 1 <sup>a</sup> | v1_sex(1)              | ,002 | ,162   | ,053                               | ,499        |
|                        | v1_ageBL by v1_sex(1)  | ,001 | 1,040  | 1,015                              | 1,066       |
|                        | v1_cur_psy_trm_dich(1) | ,000 | ,292   | ,199                               | ,429        |
|                        | PC1                    | ,942 | 1,250  | ,003                               | 524,845     |
|                        | PC2                    | ,816 | 2,481  | ,001                               | 5276,661    |
|                        | PC3                    | ,419 | 37,782 | ,006                               | 250441,516  |
|                        | PC4                    | ,807 | ,518   | ,003                               | 102,730     |
|                        | PC5                    | ,903 | ,735   | ,005                               | 106,245     |
|                        | z-Faktorwert(PRS_0.1)  | ,102 | ,850   | ,699                               | 1,033       |
|                        | Konstante              | ,000 | 5,219  |                                    |             |

a. In Schritt 1 eingeebene Variablen: z-Faktorwert(PRS\_0.1).

```
LOGISTIC REGRESSION VARIABLES follow_up_dich
/METHOD=ENTER v1_sex v1_ageBL*v1_sex v1_cur_psy_trm_dich PC1 PC2 PC3 PC4
PC5
/METHOD=ENTER ZPRS_0.2
/CONTRAST (v1_sex)=Indicator
/CONTRAST (v1_sex)=Indicator
/CONTRAST (v1_cur_psy_trm_dich)=Indicator
/PRINT=CI(95)
/CRITERIA=PIN(0.05) POUT(0.10) ITERATE(20) CUT(0.5).
```

## Logistische Regression

### Warnungen

Kontrast für diese kategoriale Variable bereits angegeben. Der letzte Kontrast wird verwendet.

### Zusammenfassung der Fallverarbeitung

| Ungewichtete Fälle <sup>a</sup> |                       | N   | Prozent |
|---------------------------------|-----------------------|-----|---------|
| Ausgewählte Fälle               | Einbezogen in Analyse | 613 | 99,4    |
|                                 | Fehlende Fälle        | 4   | ,6      |
|                                 | Gesamt                | 617 | 100,0   |
| Nicht ausgewählte Fälle         |                       | 0   | ,0      |
| Gesamt                          |                       | 617 | 100,0   |

a. Wenn die Gewichtung wirksam ist, finden Sie die Gesamtzahl der Fälle in der Klassifizierungstabelle.

### Codierung abhängiger Variablen

| Ursprünglicher Wert | Interner Wert |
|---------------------|---------------|
| DROP                | 0             |
| FOLLOW              | 1             |

### Codierungen kategorialer Variablen

| Häufigkeit          |      |     | Parameterkodierung<br>(1) |
|---------------------|------|-----|---------------------------|
| v1_cur_psy_trm_dich | HOSP | 292 | 1,000                     |
|                     | OUT  | 321 | ,000                      |
| v1_sex              | F    | 277 | 1,000                     |
|                     | M    | 336 | ,000                      |

## Block 0: Anfangsblock

### Klassifizierungstabelle<sup>a,b</sup>

|           |                   |        | Vorhergesagt           |        | Prozentsatz der<br>Richtigen |
|-----------|-------------------|--------|------------------------|--------|------------------------------|
|           |                   |        | follow_up_dich<br>DROP | FOLLOW |                              |
| Schritt 0 | follow_up_dich    | DROP   | 0                      | 172    | ,0                           |
|           |                   | FOLLOW | 0                      | 441    | 100,0                        |
|           | Gesamtprozentsatz |        |                        |        | 71,9                         |

a. Konstante in das Modell einbezogen.

b. Der Trennwert lautet ,500

### Variablen in der Gleichung

|           |           | Regressionsko<br>effizientB | Standardfehler | Wald    | df | Sig. | Exp(B) |
|-----------|-----------|-----------------------------|----------------|---------|----|------|--------|
| Schritt 0 | Konstante | ,942                        | ,090           | 109,697 | 1  | ,000 | 2,564  |

### Variablen nicht in der Gleichung

|           |                 |                        | Wert   | df | Sig. |
|-----------|-----------------|------------------------|--------|----|------|
| Schritt 0 | Variablen       | v1_sex(1)              | ,017   | 1  | ,896 |
|           |                 | v1_ageBL by v1_sex(1)  | 1,785  | 1  | ,182 |
|           |                 | v1_cur_psy_trm_dich(1) | 44,518 | 1  | ,000 |
|           |                 | PC1                    | ,127   | 1  | ,722 |
|           |                 | PC2                    | ,114   | 1  | ,736 |
|           |                 | PC3                    | 1,074  | 1  | ,300 |
|           |                 | PC4                    | ,093   | 1  | ,760 |
|           |                 | PC5                    | 2,643  | 1  | ,104 |
|           | Gesamtstatistik |                        | 56,690 | 8  | ,000 |

### Block 1: Methode = Einschluß

#### Omnibus-Tests der Modellkoeffizienten

|           |         | Chi-Quadrat | df | Sig. |
|-----------|---------|-------------|----|------|
| Schritt 1 | Schritt | 58,714      | 8  | ,000 |
|           | Block   | 58,714      | 8  | ,000 |
|           | Modell  | 58,714      | 8  | ,000 |

#### Modellzusammenfassung

| Schritt | -2 Log-Likelihood    | Cox & Snell R-Quadrat | Nagelkerkes R-Quadrat |
|---------|----------------------|-----------------------|-----------------------|
| 1       | 668,926 <sup>a</sup> | ,091                  | ,131                  |

a. Schätzung beendet bei Iteration Nummer 6, weil die Parameterschätzer sich um weniger als ,001 änderten.

### Klassifizierungstabelle<sup>a</sup>

|           |                   | Vorhergesagt           |        | Prozentsatz der Richtigen |
|-----------|-------------------|------------------------|--------|---------------------------|
|           |                   | follow_up_dich<br>DROP | FOLLOW |                           |
| Schritt 1 | follow_up_dich    | DROP                   | 20     | 152                       |
|           |                   | FOLLOW                 | 16     | 425                       |
|           | Gesamtprozentsatz |                        |        |                           |
|           |                   |                        |        | 11,6                      |
|           |                   |                        |        | 96,4                      |
|           |                   |                        |        | 72,6                      |

a. Der Trennwert lautet ,500

### Variablen in der Gleichung

|                        |                        | Regressionsko<br>effizientB | Standardfehler | Wald   | df |
|------------------------|------------------------|-----------------------------|----------------|--------|----|
| Schritt 1 <sup>a</sup> | v1_sex(1)              | -1,837                      | ,574           | 10,224 | 1  |
|                        | v1_ageBL by v1_sex(1)  | ,040                        | ,012           | 10,486 | 1  |
|                        | v1_cur_psy_trm_dich(1) | -1,233                      | ,196           | 39,741 | 1  |
|                        | PC1                    | ,411                        | 3,037          | ,018   | 1  |
|                        | PC2                    | 1,532                       | 3,959          | ,150   | 1  |
|                        | PC3                    | 3,493                       | 4,610          | ,574   | 1  |
|                        | PC4                    | -,769                       | 2,677          | ,083   | 1  |
|                        | PC5                    | ,753                        | 2,453          | ,094   | 1  |
|                        | Konstante              | 1,643                       | ,178           | 84,933 | 1  |

### Variablen in der Gleichung

|                        |                        | Sig. | Exp(B) | 95% Konfidenzintervall für EXP<br>(B) |             |
|------------------------|------------------------|------|--------|---------------------------------------|-------------|
|                        |                        |      |        | Unterer Wert                          | Oberer Wert |
| Schritt 1 <sup>a</sup> | v1_sex(1)              | ,001 | ,159   | ,052                                  | ,491        |
|                        | v1_ageBL by v1_sex(1)  | ,001 | 1,041  | 1,016                                 | 1,067       |
|                        | v1_cur_psy_trm_dich(1) | ,000 | ,291   | ,199                                  | ,428        |
|                        | PC1                    | ,892 | 1,508  | ,004                                  | 579,835     |
|                        | PC2                    | ,699 | 4,626  | ,002                                  | 10845,660   |
|                        | PC3                    | ,449 | 32,896 | ,004                                  | 276356,352  |
|                        | PC4                    | ,774 | ,463   | ,002                                  | 88,017      |
|                        | PC5                    | ,759 | 2,123  | ,017                                  | 259,945     |
|                        | Konstante              | ,000 | 5,170  |                                       |             |

a. In Schritt 1 eingegebene Variablen: v1\_sex, v1\_ageBL \* v1\_sex, v1\_cur\_psy\_trm\_dich, PC1, PC2, PC3, PC4, PC5.

## Block 2: Methode = Einschluß

### Omnibus-Tests der Modellkoeffizienten

|           |         | Chi-Quadrat | df | Sig. |
|-----------|---------|-------------|----|------|
| Schritt 1 | Schritt | 2,065       | 1  | ,151 |
|           | Block   | 2,065       | 1  | ,151 |
|           | Modell  | 60,779      | 9  | ,000 |

## Modellzusammenfassung

| Schritt | -2 Log-Likelihood    | Cox & Snell R-Quadrat | Nagelkerkes R-Quadrat |
|---------|----------------------|-----------------------|-----------------------|
| 1       | 666,861 <sup>a</sup> | ,094                  | ,136                  |

a. Schätzung beendet bei Iteration Nummer 6, weil die Parameterschätzer sich um weniger als ,001 änderten.

## Klassifizierungstabelle<sup>a</sup>

| Beobachtet        |                | Vorhergesagt           |        | Prozentsatz der Richtigen |
|-------------------|----------------|------------------------|--------|---------------------------|
|                   |                | follow_up_dich<br>DROP | FOLLOW |                           |
| Schritt 1         | follow_up_dich |                        |        |                           |
|                   | DROP           | 20                     | 152    | 11,6                      |
|                   | FOLLOW         | 18                     | 423    | 95,9                      |
| Gesamtprozentsatz |                |                        |        | 72,3                      |

a. Der Trennwert lautet ,500

## Variablen in der Gleichung

|                        |                        | Regressionsko<br>effizientB | Standardfehler | Wald   | df |
|------------------------|------------------------|-----------------------------|----------------|--------|----|
| Schritt 1 <sup>a</sup> | v1_sex(1)              | -1,828                      | ,573           | 10,163 | 1  |
|                        | v1_ageBL by v1_sex(1)  | ,040                        | ,012           | 10,339 | 1  |
|                        | v1_cur_psy_trm_dich(1) | -1,227                      | ,196           | 39,241 | 1  |
|                        | PC1                    | ,285                        | 3,069          | ,009   | 1  |
|                        | PC2                    | ,993                        | 3,892          | ,065   | 1  |
|                        | PC3                    | 3,623                       | 4,456          | ,661   | 1  |
|                        | PC4                    | -,683                       | 2,685          | ,065   | 1  |
|                        | PC5                    | -,222                       | 2,545          | ,008   | 1  |
|                        | z-Faktorwert(PRS_0.2)  | -,142                       | ,099           | 2,050  | 1  |
|                        | Konstante              | 1,647                       | ,179           | 84,974 | 1  |



### Variablen in der Gleichung

|                        |                        |      |        | 95% Konfidenzintervall für EXP (B) |             |
|------------------------|------------------------|------|--------|------------------------------------|-------------|
|                        |                        | Sig. | Exp(B) | Unterer Wert                       | Oberer Wert |
| Schritt 1 <sup>a</sup> | v1_sex(1)              | ,001 | ,161   | ,052                               | ,495        |
|                        | v1_ageBL by v1_sex(1)  | ,001 | 1,041  | 1,016                              | 1,066       |
|                        | v1_cur_psy_trm_dich(1) | ,000 | ,293   | ,200                               | ,430        |
|                        | PC1                    | ,926 | 1,329  | ,003                               | 544,357     |
|                        | PC2                    | ,799 | 2,698  | ,001                               | 5550,935    |
|                        | PC3                    | ,416 | 37,462 | ,006                               | 232634,651  |
|                        | PC4                    | ,799 | ,505   | ,003                               | 97,586      |
|                        | PC5                    | ,930 | ,801   | ,005                               | 117,447     |
|                        | z-Faktorwert(PRS_0.2)  | ,152 | ,868   | ,714                               | 1,054       |
|                        | Konstante              | ,000 | 5,191  |                                    |             |

a. In Schritt 1 eingegebene Variablen: z-Faktorwert(PRS\_0.2).

```
LOGISTIC REGRESSION VARIABLES follow_up_dich
/METHOD=ENTER v1_sex v1_ageBL*v1_sex v1_cur_psy_trm_dich PC1 PC2 PC3 PC4
PC5
/METHOD=ENTER ZPRS_0.3
/CONTRAST (v1_sex)=Indicator
/CONTRAST (v1_sex)=Indicator
/CONTRAST (v1_cur_psy_trm_dich)=Indicator
/PRINT=CI(95)
/CRITERIA=PIN(0.05) POUT(0.10) ITERATE(20) CUT(0.5).
```

## Logistische Regression

### Warnungen

Kontrast für diese kategoriale Variable bereits angegeben. Der letzte Kontrast wird verwendet.

### Zusammenfassung der Fallverarbeitung

| Ungewichtete Fälle <sup>a</sup> |                       | N   | Prozent |
|---------------------------------|-----------------------|-----|---------|
| Ausgewählte Fälle               | Einbezogen in Analyse | 613 | 99,4    |
|                                 | Fehlende Fälle        | 4   | ,6      |
|                                 | Gesamt                | 617 | 100,0   |
| Nicht ausgewählte Fälle         |                       | 0   | ,0      |
| Gesamt                          |                       | 617 | 100,0   |

a. Wenn die Gewichtung wirksam ist, finden Sie die Gesamtzahl der Fälle in der Klassifizierungstabelle.

### Codierung abhängiger Variablen

| Ursprünglicher Wert | Interner Wert |
|---------------------|---------------|
| DROP                | 0             |
| FOLLOW              | 1             |

### Codierungen kategorialer Variablen

| Häufigkeit          |      |     | Parameterkodierung<br>(1) |
|---------------------|------|-----|---------------------------|
| v1_cur_psy_trm_dich | HOSP | 292 | 1,000                     |
|                     | OUT  | 321 | ,000                      |
| v1_sex              | F    | 277 | 1,000                     |
|                     | M    | 336 | ,000                      |

### Block 0: Anfangsblock

#### Klassifizierungstabelle<sup>a,b</sup>

| Beobachtet |                   |        | Vorhergesagt           |        | Prozentsatz der<br>Richtigen |
|------------|-------------------|--------|------------------------|--------|------------------------------|
|            |                   |        | follow_up_dich<br>DROP | FOLLOW |                              |
| Schritt 0  | follow_up_dich    | DROP   | 0                      | 172    | ,0                           |
|            |                   | FOLLOW | 0                      | 441    | 100,0                        |
|            | Gesamtprozentsatz |        |                        |        | 71,9                         |

a. Konstante in das Modell einbezogen.

b. Der Trennwert lautet ,500

### Variablen in der Gleichung

|           |           | Regressionsko-<br>effizientB | Standardfehler | Wald    | df | Sig. | Exp(B) |
|-----------|-----------|------------------------------|----------------|---------|----|------|--------|
| Schritt 0 | Konstante | ,942                         | ,090           | 109,697 | 1  | ,000 | 2,564  |

### Variablen nicht in der Gleichung

|           |                 |                        | Wert   | df | Sig. |
|-----------|-----------------|------------------------|--------|----|------|
| Schritt 0 | Variablen       | v1_sex(1)              | ,017   | 1  | ,896 |
|           |                 | v1_ageBL by v1_sex(1)  | 1,785  | 1  | ,182 |
|           |                 | v1_cur_psy_trm_dich(1) | 44,518 | 1  | ,000 |
|           |                 | PC1                    | ,127   | 1  | ,722 |
|           |                 | PC2                    | ,114   | 1  | ,736 |
|           |                 | PC3                    | 1,074  | 1  | ,300 |
|           |                 | PC4                    | ,093   | 1  | ,760 |
|           |                 | PC5                    | 2,643  | 1  | ,104 |
|           | Gesamtstatistik |                        | 56,690 | 8  | ,000 |

## Block 1: Methode = Einschluß

### Omnibus-Tests der Modellkoeffizienten

|           |         | Chi-Quadrat | df | Sig. |
|-----------|---------|-------------|----|------|
| Schritt 1 | Schritt | 58,714      | 8  | ,000 |
|           | Block   | 58,714      | 8  | ,000 |
|           | Modell  | 58,714      | 8  | ,000 |

### Modellzusammenfassung

| Schritt | -2 Log-Likelihood    | Cox & Snell R-Quadrat | Nagelkerkes R-Quadrat |
|---------|----------------------|-----------------------|-----------------------|
| 1       | 668,926 <sup>a</sup> | ,091                  | ,131                  |

a. Schätzung beendet bei Iteration Nummer 6, weil die Parameterschätzer sich um weniger als ,001 änderten.

### Klassifizierungstabelle<sup>a</sup>

|           |                   | Vorhergesagt           |        | Prozentsatz der Richtigen |
|-----------|-------------------|------------------------|--------|---------------------------|
|           |                   | follow_up_dich<br>DROP | FOLLOW |                           |
| Schritt 1 | follow_up_dich    | DROP                   | 20     | 152                       |
|           |                   | FOLLOW                 | 16     | 425                       |
|           | Gesamtprozentsatz |                        |        |                           |
|           |                   |                        |        | 11,6                      |
|           |                   |                        |        | 96,4                      |
|           |                   |                        |        | 72,6                      |

a. Der Trennwert lautet ,500

### Variablen in der Gleichung

|                        |                        | Regressionsko-<br>effizientB | Standardfehler | Wald   | df |
|------------------------|------------------------|------------------------------|----------------|--------|----|
| Schritt 1 <sup>a</sup> | v1_sex(1)              | -1,837                       | ,574           | 10,224 | 1  |
|                        | v1_ageBL by v1_sex(1)  | ,040                         | ,012           | 10,486 | 1  |
|                        | v1_cur_psy_trm_dich(1) | -1,233                       | ,196           | 39,741 | 1  |
|                        | PC1                    | ,411                         | 3,037          | ,018   | 1  |
|                        | PC2                    | 1,532                        | 3,959          | ,150   | 1  |
|                        | PC3                    | 3,493                        | 4,610          | ,574   | 1  |
|                        | PC4                    | -,769                        | 2,677          | ,083   | 1  |
|                        | PC5                    | ,753                         | 2,453          | ,094   | 1  |
|                        | Konstante              | 1,643                        | ,178           | 84,933 | 1  |

### Variablen in der Gleichung

|                        |                        | Sig. | Exp(B) | 95% Konfidenzintervall für EXP<br>(B) |             |
|------------------------|------------------------|------|--------|---------------------------------------|-------------|
|                        |                        |      |        | Unterer Wert                          | Oberer Wert |
| Schritt 1 <sup>a</sup> | v1_sex(1)              | ,001 | ,159   | ,052                                  | ,491        |
|                        | v1_ageBL by v1_sex(1)  | ,001 | 1,041  | 1,016                                 | 1,067       |
|                        | v1_cur_psy_trm_dich(1) | ,000 | ,291   | ,199                                  | ,428        |
|                        | PC1                    | ,892 | 1,508  | ,004                                  | 579,835     |
|                        | PC2                    | ,699 | 4,626  | ,002                                  | 10845,660   |
|                        | PC3                    | ,449 | 32,896 | ,004                                  | 276356,352  |
|                        | PC4                    | ,774 | ,463   | ,002                                  | 88,017      |
|                        | PC5                    | ,759 | 2,123  | ,017                                  | 259,945     |
|                        | Konstante              | ,000 | 5,170  |                                       |             |

a. In Schritt 1 eingegebene Variablen: v1\_sex, v1\_ageBL \* v1\_sex, v1\_cur\_psy\_trm\_dich, PC1, PC2, PC3, PC4, PC5.

## Block 2: Methode = Einschluß

### Omnibus-Tests der Modellkoeffizienten

|           |         | Chi-Quadrat | df | Sig. |
|-----------|---------|-------------|----|------|
| Schritt 1 | Schritt | 2,001       | 1  | ,157 |
|           | Block   | 2,001       | 1  | ,157 |
|           | Modell  | 60,714      | 9  | ,000 |

## Modellzusammenfassung

| Schritt | -2 Log-Likelihood    | Cox & Snell R-Quadrat | Nagelkerkes R-Quadrat |
|---------|----------------------|-----------------------|-----------------------|
| 1       | 666,925 <sup>a</sup> | ,094                  | ,136                  |

a. Schätzung beendet bei Iteration Nummer 6, weil die Parameterschätzer sich um weniger als ,001 änderten.

## Klassifizierungstabelle<sup>a</sup>

| Beobachtet |                     | Vorhergesagt        |        | Prozentsatz der Richtigen |
|------------|---------------------|---------------------|--------|---------------------------|
|            |                     | follow_up_dich DROP | FOLLOW |                           |
| Schritt 1  | follow_up_dich DROP | 19                  | 153    | 11,0                      |
|            | FOLLOW              | 18                  | 423    | 95,9                      |
|            | Gesamtprozentsatz   |                     |        | 72,1                      |

a. Der Trennwert lautet ,500

## Variablen in der Gleichung

|                        |                        | Regressionsko<br>effizientB | Standardfehler | Wald   | df |
|------------------------|------------------------|-----------------------------|----------------|--------|----|
| Schritt 1 <sup>a</sup> | v1_sex(1)              | -1,824                      | ,573           | 10,124 | 1  |
|                        | v1_ageBL by v1_sex(1)  | ,040                        | ,012           | 10,328 | 1  |
|                        | v1_cur_psy_trm_dich(1) | -1,226                      | ,196           | 39,173 | 1  |
|                        | PC1                    | ,267                        | 3,067          | ,008   | 1  |
|                        | PC2                    | 1,029                       | 3,905          | ,069   | 1  |
|                        | PC3                    | 3,645                       | 4,479          | ,662   | 1  |
|                        | PC4                    | -,669                       | 2,694          | ,062   | 1  |
|                        | PC5                    | -,254                       | 2,555          | ,010   | 1  |
|                        | z-Faktorwert(PRS_0.3)  | -,140                       | ,100           | 1,987  | 1  |
|                        | Konstante              | 1,645                       | ,179           | 84,875 | 1  |

### Variablen in der Gleichung

|                        |                        |      |        | 95% Konfidenzintervall für EXP (B) |             |
|------------------------|------------------------|------|--------|------------------------------------|-------------|
|                        |                        | Sig. | Exp(B) | Unterer Wert                       | Oberer Wert |
| Schritt 1 <sup>a</sup> | v1_sex(1)              | ,001 | ,161   | ,052                               | ,496        |
|                        | v1_ageBL by v1_sex(1)  | ,001 | 1,041  | 1,016                              | 1,066       |
|                        | v1_cur_psy_trm_dich(1) | ,000 | ,293   | ,200                               | ,431        |
|                        | PC1                    | ,931 | 1,306  | ,003                               | 532,653     |
|                        | PC2                    | ,792 | 2,799  | ,001                               | 5904,180    |
|                        | PC3                    | ,416 | 38,274 | ,006                               | 248619,235  |
|                        | PC4                    | ,804 | ,512   | ,003                               | 100,606     |
|                        | PC5                    | ,921 | ,776   | ,005                               | 115,901     |
|                        | z-Faktorwert(PRS_0.3)  | ,159 | ,869   | ,715                               | 1,056       |
|                        | Konstante              | ,000 | 5,183  |                                    |             |

a. In Schritt 1 eingegebene Variablen: z-Faktorwert(PRS\_0.3).

```
LOGISTIC REGRESSION VARIABLES follow_up_dich
  /METHOD=ENTER v1_sex v1_ageBL*v1_sex v1_cur_psy_trm_dich PC1 PC2 PC3 PC4
PC5
  /METHOD=ENTER ZPRS_0.4
  /CONTRAST (v1_sex)=Indicator
  /CONTRAST (v1_sex)=Indicator
  /CONTRAST (v1_cur_psy_trm_dich)=Indicator
  /PRINT=CI(95)
  /CRITERIA=PIN(0.05) POUT(0.10) ITERATE(20) CUT(0.5).
```

## Logistische Regression

### Warnungen

Kontrast für diese kategoriale Variable bereits angegeben. Der letzte Kontrast wird verwendet.

### Zusammenfassung der Fallverarbeitung

| Ungewichtete Fälle <sup>a</sup> |                       | N   | Prozent |
|---------------------------------|-----------------------|-----|---------|
| Ausgewählte Fälle               | Einbezogen in Analyse | 613 | 99,4    |
|                                 | Fehlende Fälle        | 4   | ,6      |
|                                 | Gesamt                | 617 | 100,0   |
| Nicht ausgewählte Fälle         |                       | 0   | ,0      |
| Gesamt                          |                       | 617 | 100,0   |

a. Wenn die Gewichtung wirksam ist, finden Sie die Gesamtzahl der Fälle in der Klassifizierungstabelle.

### Codierung abhängiger Variablen

| Ursprünglicher Wert | Interner Wert |
|---------------------|---------------|
| DROP                | 0             |
| FOLLOW              | 1             |

### Codierungen kategorialer Variablen

|                     |      | Häufigkeit | Parameterkodierung<br>(1) |
|---------------------|------|------------|---------------------------|
| v1_cur_psy_trm_dich | HOSP | 292        | 1,000                     |
|                     | OUT  | 321        | ,000                      |
| v1_sex              | F    | 277        | 1,000                     |
|                     | M    | 336        | ,000                      |

## Block 0: Anfangsblock

### Klassifizierungstabelle<sup>a,b</sup>

|           |                   |        | Vorhergesagt           |        | Prozentsatz der<br>Richtigen |
|-----------|-------------------|--------|------------------------|--------|------------------------------|
|           |                   |        | follow_up_dich<br>DROP | FOLLOW |                              |
| Schritt 0 | follow_up_dich    | DROP   | 0                      | 172    | ,0                           |
|           |                   | FOLLOW | 0                      | 441    | 100,0                        |
|           | Gesamtprozentsatz |        |                        |        | 71,9                         |

a. Konstante in das Modell einbezogen.

b. Der Trennwert lautet ,500

### Variablen in der Gleichung

|                     | Regressionsko<br>effizientB | Standardfehler | Wald    | df | Sig. | Exp(B) |
|---------------------|-----------------------------|----------------|---------|----|------|--------|
| Schritt 0 Konstante | ,942                        | ,090           | 109,697 | 1  | ,000 | 2,564  |

### Variablen nicht in der Gleichung

|           |                 |                        | Wert   | df | Sig. |
|-----------|-----------------|------------------------|--------|----|------|
| Schritt 0 | Variablen       | v1_sex(1)              | ,017   | 1  | ,896 |
|           |                 | v1_ageBL by v1_sex(1)  | 1,785  | 1  | ,182 |
|           |                 | v1_cur_psy_trm_dich(1) | 44,518 | 1  | ,000 |
|           |                 | PC1                    | ,127   | 1  | ,722 |
|           |                 | PC2                    | ,114   | 1  | ,736 |
|           |                 | PC3                    | 1,074  | 1  | ,300 |
|           |                 | PC4                    | ,093   | 1  | ,760 |
|           |                 | PC5                    | 2,643  | 1  | ,104 |
|           | Gesamtstatistik |                        | 56,690 | 8  | ,000 |

### Block 1: Methode = Einschluß

#### Omnibus-Tests der Modellkoeffizienten

|           |         | Chi-Quadrat | df | Sig. |
|-----------|---------|-------------|----|------|
| Schritt 1 | Schritt | 58,714      | 8  | ,000 |
|           | Block   | 58,714      | 8  | ,000 |
|           | Modell  | 58,714      | 8  | ,000 |

#### Modellzusammenfassung

| Schritt | -2 Log-Likelihood    | Cox & Snell R-Quadrat | Nagelkerkes R-Quadrat |
|---------|----------------------|-----------------------|-----------------------|
| 1       | 668,926 <sup>a</sup> | ,091                  | ,131                  |

a. Schätzung beendet bei Iteration Nummer 6, weil die Parameterschätzer sich um weniger als ,001 änderten.

### Klassifizierungstabelle<sup>a</sup>

|           |                   |                | Vorhergesagt           |        | Prozentsatz der Richtigen |      |
|-----------|-------------------|----------------|------------------------|--------|---------------------------|------|
|           |                   |                | follow_up_dich<br>DROP | FOLLOW |                           |      |
| Schritt 1 | Beobachtet        | follow_up_dich | DROP                   | 20     | 152                       | 11,6 |
|           |                   |                | FOLLOW                 | 16     | 425                       | 96,4 |
|           | Gesamtprozentsatz |                |                        |        |                           |      |

a. Der Trennwert lautet ,500



### Variablen in der Gleichung

|                        |                        | Regressionsko<br>effizientB | Standardfehler | Wald   | df |
|------------------------|------------------------|-----------------------------|----------------|--------|----|
| Schritt 1 <sup>a</sup> | v1_sex(1)              | -1,837                      | ,574           | 10,224 | 1  |
|                        | v1_ageBL by v1_sex(1)  | ,040                        | ,012           | 10,486 | 1  |
|                        | v1_cur_psy_trm_dich(1) | -1,233                      | ,196           | 39,741 | 1  |
|                        | PC1                    | ,411                        | 3,037          | ,018   | 1  |
|                        | PC2                    | 1,532                       | 3,959          | ,150   | 1  |
|                        | PC3                    | 3,493                       | 4,610          | ,574   | 1  |
|                        | PC4                    | -,769                       | 2,677          | ,083   | 1  |
|                        | PC5                    | ,753                        | 2,453          | ,094   | 1  |
|                        | Konstante              | 1,643                       | ,178           | 84,933 | 1  |

### Variablen in der Gleichung

|                        |                        | Sig. | Exp(B) | 95% Konfidenzintervall für EXP<br>(B) |             |
|------------------------|------------------------|------|--------|---------------------------------------|-------------|
|                        |                        |      |        | Unterer Wert                          | Oberer Wert |
| Schritt 1 <sup>a</sup> | v1_sex(1)              | ,001 | ,159   | ,052                                  | ,491        |
|                        | v1_ageBL by v1_sex(1)  | ,001 | 1,041  | 1,016                                 | 1,067       |
|                        | v1_cur_psy_trm_dich(1) | ,000 | ,291   | ,199                                  | ,428        |
|                        | PC1                    | ,892 | 1,508  | ,004                                  | 579,835     |
|                        | PC2                    | ,699 | 4,626  | ,002                                  | 10845,660   |
|                        | PC3                    | ,449 | 32,896 | ,004                                  | 276356,352  |
|                        | PC4                    | ,774 | ,463   | ,002                                  | 88,017      |
|                        | PC5                    | ,759 | 2,123  | ,017                                  | 259,945     |
|                        | Konstante              | ,000 | 5,170  |                                       |             |

a. In Schritt 1 eingegebene Variablen: v1\_sex, v1\_ageBL \* v1\_sex, v1\_cur\_psy\_trm\_dich, PC1, PC2, PC3, PC4, PC5.

## Block 2: Methode = Einschluß

### Omnibus-Tests der Modellkoeffizienten

|           |         | Chi-Quadrat | df | Sig. |
|-----------|---------|-------------|----|------|
| Schritt 1 | Schritt | 2,003       | 1  | ,157 |
|           | Block   | 2,003       | 1  | ,157 |
|           | Modell  | 60,717      | 9  | ,000 |

## Modellzusammenfassung

| Schritt | -2 Log-Likelihood    | Cox & Snell R-Quadrat | Nagelkerkes R-Quadrat |
|---------|----------------------|-----------------------|-----------------------|
| 1       | 666,923 <sup>a</sup> | ,094                  | ,136                  |

a. Schätzung beendet bei Iteration Nummer 6, weil die Parameterschätzer sich um weniger als ,001 änderten.

## Klassifizierungstabelle<sup>a</sup>

| Beobachtet        |                | Vorhergesagt           |        | Prozentsatz der Richtigen |
|-------------------|----------------|------------------------|--------|---------------------------|
|                   |                | follow_up_dich<br>DROP | FOLLOW |                           |
| Schritt 1         | follow_up_dich |                        |        |                           |
|                   | DROP           | 19                     | 153    | 11,0                      |
|                   | FOLLOW         | 18                     | 423    | 95,9                      |
| Gesamtprozentsatz |                |                        |        | 72,1                      |

a. Der Trennwert lautet ,500

## Variablen in der Gleichung

|                        |                        | Regressionsko<br>effizientB | Standardfehler | Wald   | df |
|------------------------|------------------------|-----------------------------|----------------|--------|----|
| Schritt 1 <sup>a</sup> | v1_sex(1)              | -1,823                      | ,573           | 10,102 | 1  |
|                        | v1_ageBL by v1_sex(1)  | ,040                        | ,012           | 10,329 | 1  |
|                        | v1_cur_psy_trm_dich(1) | -1,226                      | ,196           | 39,144 | 1  |
|                        | PC1                    | ,234                        | 3,065          | ,006   | 1  |
|                        | PC2                    | 1,058                       | 3,914          | ,073   | 1  |
|                        | PC3                    | 3,651                       | 4,498          | ,659   | 1  |
|                        | PC4                    | -,697                       | 2,693          | ,067   | 1  |
|                        | PC5                    | -,249                       | 2,555          | ,010   | 1  |
|                        | z-Faktorwert(PRS_0.4)  | -,140                       | ,099           | 1,990  | 1  |
|                        | Konstante              | 1,644                       | ,179           | 84,778 | 1  |

### Variablen in der Gleichung

|                        |                        |      |        | 95% Konfidenzintervall für EXP (B) |             |
|------------------------|------------------------|------|--------|------------------------------------|-------------|
|                        |                        | Sig. | Exp(B) | Unterer Wert                       | Oberer Wert |
| Schritt 1 <sup>a</sup> | v1_sex(1)              | ,001 | ,162   | ,053                               | ,497        |
|                        | v1_ageBL by v1_sex(1)  | ,001 | 1,041  | 1,016                              | 1,066       |
|                        | v1_cur_psy_trm_dich(1) | ,000 | ,294   | ,200                               | ,431        |
|                        | PC1                    | ,939 | 1,264  | ,003                               | 514,030     |
|                        | PC2                    | ,787 | 2,881  | ,001                               | 6177,925    |
|                        | PC3                    | ,417 | 38,520 | ,006                               | 259493,334  |
|                        | PC4                    | ,796 | ,498   | ,003                               | 97,734      |
|                        | PC5                    | ,922 | ,779   | ,005                               | 116,518     |
|                        | z-Faktorwert(PRS_0.4)  | ,158 | ,869   | ,715                               | 1,056       |
|                        | Konstante              | ,000 | 5,177  |                                    |             |

a. In Schritt 1 eingegebene Variablen: z-Faktorwert(PRS\_0.4).

```
LOGISTIC REGRESSION VARIABLES follow_up_dich
  /METHOD=ENTER v1_sex v1_ageBL*v1_sex v1_cur_psy_trm_dich PC1 PC2 PC3 PC4
PC5
  /METHOD=ENTER ZPRS_0.5
  /CONTRAST (v1_sex)=Indicator
  /CONTRAST (v1_sex)=Indicator
  /CONTRAST (v1_cur_psy_trm_dich)=Indicator
  /PRINT=CI(95)
  /CRITERIA=PIN(0.05) POUT(0.10) ITERATE(20) CUT(0.5).
```

## Logistische Regression

### Warnungen

Kontrast für diese kategoriale Variable bereits angegeben. Der letzte Kontrast wird verwendet.

### Zusammenfassung der Fallverarbeitung

| Ungewichtete Fälle <sup>a</sup> |                       | N   | Prozent |
|---------------------------------|-----------------------|-----|---------|
| Ausgewählte Fälle               | Einbezogen in Analyse | 613 | 99,4    |
|                                 | Fehlende Fälle        | 4   | ,6      |
|                                 | Gesamt                | 617 | 100,0   |
| Nicht ausgewählte Fälle         |                       | 0   | ,0      |
| Gesamt                          |                       | 617 | 100,0   |

a. Wenn die Gewichtung wirksam ist, finden Sie die Gesamtzahl der Fälle in der Klassifizierungstabelle.

### Codierung abhängiger Variablen

| Ursprünglicher Wert | Interner Wert |
|---------------------|---------------|
| DROP                | 0             |
| FOLLOW              | 1             |

### Codierungen kategorialer Variablen

|                     |      | Häufigkeit | Parameterkodierung<br>(1) |
|---------------------|------|------------|---------------------------|
| v1_cur_psy_trm_dich | HOSP | 292        | 1,000                     |
|                     | OUT  | 321        | ,000                      |
| v1_sex              | F    | 277        | 1,000                     |
|                     | M    | 336        | ,000                      |

## Block 0: Anfangsblock

### Klassifizierungstabelle<sup>a,b</sup>

|           |                   |        | Vorhergesagt           |        | Prozentsatz der<br>Richtigen |
|-----------|-------------------|--------|------------------------|--------|------------------------------|
|           |                   |        | follow_up_dich<br>DROP | FOLLOW |                              |
| Schritt 0 | follow_up_dich    | DROP   | 0                      | 172    | ,0                           |
|           |                   | FOLLOW | 0                      | 441    | 100,0                        |
|           | Gesamtprozentsatz |        |                        |        | 71,9                         |

a. Konstante in das Modell einbezogen.

b. Der Trennwert lautet ,500

### Variablen in der Gleichung

|                     | Regressionsko<br>effizientB | Standardfehler | Wald    | df | Sig. | Exp(B) |
|---------------------|-----------------------------|----------------|---------|----|------|--------|
| Schritt 0 Konstante | ,942                        | ,090           | 109,697 | 1  | ,000 | 2,564  |

### Variablen nicht in der Gleichung

|           |                 |                        | Wert   | df | Sig. |
|-----------|-----------------|------------------------|--------|----|------|
| Schritt 0 | Variablen       | v1_sex(1)              | ,017   | 1  | ,896 |
|           |                 | v1_ageBL by v1_sex(1)  | 1,785  | 1  | ,182 |
|           |                 | v1_cur_psy_trm_dich(1) | 44,518 | 1  | ,000 |
|           |                 | PC1                    | ,127   | 1  | ,722 |
|           |                 | PC2                    | ,114   | 1  | ,736 |
|           |                 | PC3                    | 1,074  | 1  | ,300 |
|           |                 | PC4                    | ,093   | 1  | ,760 |
|           |                 | PC5                    | 2,643  | 1  | ,104 |
|           | Gesamtstatistik |                        | 56,690 | 8  | ,000 |

### Block 1: Methode = Einschluß

#### Omnibus-Tests der Modellkoeffizienten

|           |         | Chi-Quadrat | df | Sig. |
|-----------|---------|-------------|----|------|
| Schritt 1 | Schritt | 58,714      | 8  | ,000 |
|           | Block   | 58,714      | 8  | ,000 |
|           | Modell  | 58,714      | 8  | ,000 |

#### Modellzusammenfassung

| Schritt | -2 Log-Likelihood    | Cox & Snell R-Quadrat | Nagelkerkes R-Quadrat |
|---------|----------------------|-----------------------|-----------------------|
| 1       | 668,926 <sup>a</sup> | ,091                  | ,131                  |

a. Schätzung beendet bei Iteration Nummer 6, weil die Parameterschätzer sich um weniger als ,001 änderten.

### Klassifizierungstabelle<sup>a</sup>

|           |                   | Vorhergesagt           |        | Prozentsatz der Richtigen |
|-----------|-------------------|------------------------|--------|---------------------------|
|           |                   | follow_up_dich<br>DROP | FOLLOW |                           |
| Schritt 1 | follow_up_dich    | DROP                   | 20     | 152                       |
|           |                   | FOLLOW                 | 16     | 425                       |
|           | Gesamtprozentsatz |                        |        |                           |
|           |                   |                        |        | 11,6                      |
|           |                   |                        |        | 96,4                      |
|           |                   |                        |        | 72,6                      |

a. Der Trennwert lautet ,500

### Variablen in der Gleichung

|                        |                        | Regressionsko<br>effizientB | Standardfehler | Wald   | df |
|------------------------|------------------------|-----------------------------|----------------|--------|----|
| Schritt 1 <sup>a</sup> | v1_sex(1)              | -1,837                      | ,574           | 10,224 | 1  |
|                        | v1_ageBL by v1_sex(1)  | ,040                        | ,012           | 10,486 | 1  |
|                        | v1_cur_psy_trm_dich(1) | -1,233                      | ,196           | 39,741 | 1  |
|                        | PC1                    | ,411                        | 3,037          | ,018   | 1  |
|                        | PC2                    | 1,532                       | 3,959          | ,150   | 1  |
|                        | PC3                    | 3,493                       | 4,610          | ,574   | 1  |
|                        | PC4                    | -,769                       | 2,677          | ,083   | 1  |
|                        | PC5                    | ,753                        | 2,453          | ,094   | 1  |
|                        | Konstante              | 1,643                       | ,178           | 84,933 | 1  |

### Variablen in der Gleichung

|                        |                        | Sig. | Exp(B) | 95% Konfidenzintervall für EXP<br>(B) |             |
|------------------------|------------------------|------|--------|---------------------------------------|-------------|
|                        |                        |      |        | Unterer Wert                          | Oberer Wert |
| Schritt 1 <sup>a</sup> | v1_sex(1)              | ,001 | ,159   | ,052                                  | ,491        |
|                        | v1_ageBL by v1_sex(1)  | ,001 | 1,041  | 1,016                                 | 1,067       |
|                        | v1_cur_psy_trm_dich(1) | ,000 | ,291   | ,199                                  | ,428        |
|                        | PC1                    | ,892 | 1,508  | ,004                                  | 579,835     |
|                        | PC2                    | ,699 | 4,626  | ,002                                  | 10845,660   |
|                        | PC3                    | ,449 | 32,896 | ,004                                  | 276356,352  |
|                        | PC4                    | ,774 | ,463   | ,002                                  | 88,017      |
|                        | PC5                    | ,759 | 2,123  | ,017                                  | 259,945     |
|                        | Konstante              | ,000 | 5,170  |                                       |             |

a. In Schritt 1 eingegebene Variablen: v1\_sex, v1\_ageBL \* v1\_sex, v1\_cur\_psy\_trm\_dich, PC1, PC2, PC3, PC4, PC5.

## Block 2: Methode = Einschluß

### Omnibus-Tests der Modellkoeffizienten

|           |         | Chi-Quadrat | df | Sig. |
|-----------|---------|-------------|----|------|
| Schritt 1 | Schritt | 2,080       | 1  | ,149 |
|           | Block   | 2,080       | 1  | ,149 |
|           | Modell  | 60,793      | 9  | ,000 |

## Modellzusammenfassung

| Schritt | -2 Log-Likelihood    | Cox & Snell R-Quadrat | Nagelkerkes R-Quadrat |
|---------|----------------------|-----------------------|-----------------------|
| 1       | 666,846 <sup>a</sup> | ,094                  | ,136                  |

a. Schätzung beendet bei Iteration Nummer 6, weil die Parameterschätzer sich um weniger als ,001 änderten.

## Klassifizierungstabelle<sup>a</sup>

| Beobachtet |                     | Vorhergesagt        |        | Prozentsatz der Richtigen |
|------------|---------------------|---------------------|--------|---------------------------|
|            |                     | follow_up_dich DROP | FOLLOW |                           |
| Schritt 1  | follow_up_dich DROP | 19                  | 153    | 11,0                      |
|            | FOLLOW              | 18                  | 423    | 95,9                      |
|            | Gesamtprozentsatz   |                     |        | 72,1                      |

a. Der Trennwert lautet ,500

## Variablen in der Gleichung

|                        |                        | Regressionsko<br>effizientB | Standardfehler | Wald   | df |
|------------------------|------------------------|-----------------------------|----------------|--------|----|
| Schritt 1 <sup>a</sup> | v1_sex(1)              | -1,823                      | ,573           | 10,106 | 1  |
|                        | v1_ageBL by v1_sex(1)  | ,040                        | ,012           | 10,349 | 1  |
|                        | v1_cur_psy_trm_dich(1) | -1,225                      | ,196           | 39,085 | 1  |
|                        | PC1                    | ,229                        | 3,068          | ,006   | 1  |
|                        | PC2                    | 1,043                       | 3,921          | ,071   | 1  |
|                        | PC3                    | 3,669                       | 4,506          | ,663   | 1  |
|                        | PC4                    | -,699                       | 2,695          | ,067   | 1  |
|                        | PC5                    | -,273                       | 2,556          | ,011   | 1  |
|                        | z-Faktorwert(PRS_0.5)  | -,143                       | ,099           | 2,065  | 1  |
|                        | Konstante              | 1,643                       | ,179           | 84,709 | 1  |

### Variablen in der Gleichung

|                        |                        |      |        | 95% Konfidenzintervall für EXP (B) |             |
|------------------------|------------------------|------|--------|------------------------------------|-------------|
|                        |                        | Sig. | Exp(B) | Unterer Wert                       | Oberer Wert |
| Schritt 1 <sup>a</sup> | v1_sex(1)              | ,001 | ,162   | ,053                               | ,497        |
|                        | v1_ageBL by v1_sex(1)  | ,001 | 1,041  | 1,016                              | 1,066       |
|                        | v1_cur_psy_trm_dich(1) | ,000 | ,294   | ,200                               | ,431        |
|                        | PC1                    | ,941 | 1,257  | ,003                               | 514,154     |
|                        | PC2                    | ,790 | 2,838  | ,001                               | 6169,540    |
|                        | PC3                    | ,416 | 39,205 | ,006                               | 268706,146  |
|                        | PC4                    | ,795 | ,497   | ,003                               | 97,873      |
|                        | PC5                    | ,915 | ,761   | ,005                               | 114,113     |
|                        | z-Faktorwert(PRS_0.5)  | ,151 | ,867   | ,713                               | 1,053       |
|                        | Konstante              | ,000 | 5,173  |                                    |             |

a. In Schritt 1 eingegebene Variablen: z-Faktorwert(PRS\_0.5).

```
LOGISTIC REGRESSION VARIABLES follow_up_dich
  /METHOD=ENTER v1_sex v1_ageBL*v1_sex v1_cur_psy_trm_dich PC1 PC2 PC3 PC4
PC5
  /METHOD=ENTER ZPRS_1
  /CONTRAST (v1_sex)=Indicator
  /CONTRAST (v1_sex)=Indicator
  /CONTRAST (v1_cur_psy_trm_dich)=Indicator
  /PRINT=CI(95)
  /CRITERIA=PIN(0.05) POUT(0.10) ITERATE(20) CUT(0.5).
```

## Logistische Regression

### Warnungen

Kontrast für diese kategoriale Variable bereits angegeben. Der letzte Kontrast wird verwendet.

### Zusammenfassung der Fallverarbeitung

| Ungewichtete Fälle <sup>a</sup> |                       | N   | Prozent |
|---------------------------------|-----------------------|-----|---------|
| Ausgewählte Fälle               | Einbezogen in Analyse | 613 | 99,4    |
|                                 | Fehlende Fälle        | 4   | ,6      |
|                                 | Gesamt                | 617 | 100,0   |
| Nicht ausgewählte Fälle         |                       | 0   | ,0      |
| Gesamt                          |                       | 617 | 100,0   |

a. Wenn die Gewichtung wirksam ist, finden Sie die Gesamtzahl der Fälle in der Klassifizierungstabelle.



### Codierung abhängiger Variablen

| Ursprünglicher Wert | Interner Wert |
|---------------------|---------------|
| DROP                | 0             |
| FOLLOW              | 1             |

### Codierungen kategorialer Variablen

| Häufigkeit          |      |     | Parameterkodierung<br>(1) |
|---------------------|------|-----|---------------------------|
| v1_cur_psy_trm_dich | HOSP | 292 | 1,000                     |
|                     | OUT  | 321 | ,000                      |
| v1_sex              | F    | 277 | 1,000                     |
|                     | M    | 336 | ,000                      |

### Block 0: Anfangsblock

#### Klassifizierungstabelle<sup>a,b</sup>

|           |                   |        | Vorhergesagt           |        | Prozentsatz der<br>Richtigen |
|-----------|-------------------|--------|------------------------|--------|------------------------------|
|           |                   |        | follow_up_dich<br>DROP | FOLLOW |                              |
| Schritt 0 | follow_up_dich    | DROP   | 0                      | 172    | ,0                           |
|           |                   | FOLLOW | 0                      | 441    | 100,0                        |
|           | Gesamtprozentsatz |        |                        |        | 71,9                         |

a. Konstante in das Modell einbezogen.

b. Der Trennwert lautet ,500

### Variablen in der Gleichung

|           |           | Regressionsko-<br>effizientB | Standardfehler | Wald    | df | Sig. | Exp(B) |
|-----------|-----------|------------------------------|----------------|---------|----|------|--------|
| Schritt 0 | Konstante | ,942                         | ,090           | 109,697 | 1  | ,000 | 2,564  |

### Variablen nicht in der Gleichung

|           |                 |                        | Wert   | df | Sig. |
|-----------|-----------------|------------------------|--------|----|------|
| Schritt 0 | Variablen       | v1_sex(1)              | ,017   | 1  | ,896 |
|           |                 | v1_ageBL by v1_sex(1)  | 1,785  | 1  | ,182 |
|           |                 | v1_cur_psy_trm_dich(1) | 44,518 | 1  | ,000 |
|           |                 | PC1                    | ,127   | 1  | ,722 |
|           |                 | PC2                    | ,114   | 1  | ,736 |
|           |                 | PC3                    | 1,074  | 1  | ,300 |
|           |                 | PC4                    | ,093   | 1  | ,760 |
|           |                 | PC5                    | 2,643  | 1  | ,104 |
|           | Gesamtstatistik |                        | 56,690 | 8  | ,000 |

### Block 1: Methode = Einschluß

#### Omnibus-Tests der Modellkoeffizienten

|           |         | Chi-Quadrat | df | Sig. |
|-----------|---------|-------------|----|------|
| Schritt 1 | Schritt | 58,714      | 8  | ,000 |
|           | Block   | 58,714      | 8  | ,000 |
|           | Modell  | 58,714      | 8  | ,000 |

#### Modellzusammenfassung

| Schritt | -2 Log-Likelihood    | Cox & Snell R-Quadrat | Nagelkerkes R-Quadrat |
|---------|----------------------|-----------------------|-----------------------|
| 1       | 668,926 <sup>a</sup> | ,091                  | ,131                  |

a. Schätzung beendet bei Iteration Nummer 6, weil die Parameterschätzer sich um weniger als ,001 änderten.

### Klassifizierungstabelle<sup>a</sup>

|           |                   |                | Vorhergesagt           |        | Prozentsatz der Richtigen |
|-----------|-------------------|----------------|------------------------|--------|---------------------------|
|           |                   |                | follow_up_dich<br>DROP | FOLLOW |                           |
| Schritt 1 | Beobachtet        | follow_up_dich | DROP                   | FOLLOW |                           |
|           |                   |                |                        |        |                           |
|           | Gesamtprozentsatz |                |                        |        |                           |

a. Der Trennwert lautet ,500

### Variablen in der Gleichung

|                        |                        | Regressionsko<br>effizientB | Standardfehler | Wald   | df |
|------------------------|------------------------|-----------------------------|----------------|--------|----|
| Schritt 1 <sup>a</sup> | v1_sex(1)              | -1,837                      | ,574           | 10,224 | 1  |
|                        | v1_ageBL by v1_sex(1)  | ,040                        | ,012           | 10,486 | 1  |
|                        | v1_cur_psy_trm_dich(1) | -1,233                      | ,196           | 39,741 | 1  |
|                        | PC1                    | ,411                        | 3,037          | ,018   | 1  |
|                        | PC2                    | 1,532                       | 3,959          | ,150   | 1  |
|                        | PC3                    | 3,493                       | 4,610          | ,574   | 1  |
|                        | PC4                    | -,769                       | 2,677          | ,083   | 1  |
|                        | PC5                    | ,753                        | 2,453          | ,094   | 1  |
|                        | Konstante              | 1,643                       | ,178           | 84,933 | 1  |

### Variablen in der Gleichung

|                        |                        | Sig. | Exp(B) | 95% Konfidenzintervall für EXP<br>(B) |             |
|------------------------|------------------------|------|--------|---------------------------------------|-------------|
|                        |                        |      |        | Unterer Wert                          | Oberer Wert |
| Schritt 1 <sup>a</sup> | v1_sex(1)              | ,001 | ,159   | ,052                                  | ,491        |
|                        | v1_ageBL by v1_sex(1)  | ,001 | 1,041  | 1,016                                 | 1,067       |
|                        | v1_cur_psy_trm_dich(1) | ,000 | ,291   | ,199                                  | ,428        |
|                        | PC1                    | ,892 | 1,508  | ,004                                  | 579,835     |
|                        | PC2                    | ,699 | 4,626  | ,002                                  | 10845,660   |
|                        | PC3                    | ,449 | 32,896 | ,004                                  | 276356,352  |
|                        | PC4                    | ,774 | ,463   | ,002                                  | 88,017      |
|                        | PC5                    | ,759 | 2,123  | ,017                                  | 259,945     |
|                        | Konstante              | ,000 | 5,170  |                                       |             |

a. In Schritt 1 eingegebene Variablen: v1\_sex, v1\_ageBL \* v1\_sex, v1\_cur\_psy\_trm\_dich, PC1, PC2, PC3, PC4, PC5.

## Block 2: Methode = Einschluß

### Omnibus-Tests der Modellkoeffizienten

|           |         | Chi-Quadrat | df | Sig. |
|-----------|---------|-------------|----|------|
| Schritt 1 | Schritt | 2,174       | 1  | ,140 |
|           | Block   | 2,174       | 1  | ,140 |
|           | Modell  | 60,888      | 9  | ,000 |

## Modellzusammenfassung

| Schritt | -2 Log-Likelihood    | Cox & Snell R-Quadrat | Nagelkerkes R-Quadrat |
|---------|----------------------|-----------------------|-----------------------|
| 1       | 666,752 <sup>a</sup> | ,095                  | ,136                  |

a. Schätzung beendet bei Iteration Nummer 6, weil die Parameterschätzer sich um weniger als ,001 änderten.

## Klassifizierungstabelle<sup>a</sup>

| Beobachtet        |                | Vorhergesagt           |        | Prozentsatz der Richtigen |
|-------------------|----------------|------------------------|--------|---------------------------|
|                   |                | follow_up_dich<br>DROP | FOLLOW |                           |
| Schritt 1         | follow_up_dich |                        |        |                           |
|                   | DROP           | 19                     | 153    | 11,0                      |
|                   | FOLLOW         | 18                     | 423    | 95,9                      |
| Gesamtprozentsatz |                |                        |        | 72,1                      |

a. Der Trennwert lautet ,500

## Variablen in der Gleichung

|                        |                        | Regressionsko<br>effizientB | Standardfehler | Wald   | df |
|------------------------|------------------------|-----------------------------|----------------|--------|----|
| Schritt 1 <sup>a</sup> | v1_sex(1)              | -1,823                      | ,573           | 10,105 | 1  |
|                        | v1_ageBL by v1_sex(1)  | ,040                        | ,012           | 10,344 | 1  |
|                        | v1_cur_psy_trm_dich(1) | -1,224                      | ,196           | 39,055 | 1  |
|                        | PC1                    | ,237                        | 3,071          | ,006   | 1  |
|                        | PC2                    | 1,037                       | 3,917          | ,070   | 1  |
|                        | PC3                    | 3,635                       | 4,501          | ,652   | 1  |
|                        | PC4                    | -,712                       | 2,699          | ,070   | 1  |
|                        | PC5                    | -,299                       | 2,557          | ,014   | 1  |
|                        | z-Faktorwert(PRS_1)    | -,146                       | ,099           | 2,158  | 1  |
|                        | Konstante              | 1,644                       | ,179           | 84,706 | 1  |

### Variablen in der Gleichung

|                        |                        |      |        | 95% Konfidenzintervall für EXP<br>(B) |             |
|------------------------|------------------------|------|--------|---------------------------------------|-------------|
|                        |                        | Sig. | Exp(B) | Unterer Wert                          | Oberer Wert |
| Schritt 1 <sup>a</sup> | v1_sex(1)              | ,001 | ,162   | ,053                                  | ,497        |
|                        | v1_ageBL by v1_sex(1)  | ,001 | 1,041  | 1,016                                 | 1,066       |
|                        | v1_cur_psy_trm_dich(1) | ,000 | ,294   | ,200                                  | ,432        |
|                        | PC1                    | ,938 | 1,268  | ,003                                  | 521,205     |
|                        | PC2                    | ,791 | 2,821  | ,001                                  | 6085,161    |
|                        | PC3                    | ,419 | 37,912 | ,006                                  | 257090,491  |
|                        | PC4                    | ,792 | ,491   | ,002                                  | 97,256      |
|                        | PC5                    | ,907 | ,741   | ,005                                  | 111,303     |
|                        | z-Faktorwert(PRS_1)    | ,142 | ,864   | ,711                                  | 1,050       |
|                        | Konstante              | ,000 | 5,174  |                                       |             |

a. In Schritt 1 eingegebene Variablen: z-Faktorwert(PRS\_1).
